# Supplementary material for: Evolutionary and phylogenetic insights from a nuclear genome sequence of the extinct, giant, “subfossil” koala lemur Megaladapis edwardsi
Source: PubMed Central journal article supplement — Proc Natl Acad Sci U S A. 2021 Jun 23;118(26):e2022117118. doi: 10.1073/pnas.2022117118 (PMC8255780; doi:10.1073/pnas.2022117118), 2021-06-23
Supplement: pnas.2022117118.sapp.pdf [file pnas.2022117118.sapp.pdf]

## Supplementary Information for

### **Evolutionary and phylogenetic insights from a nuclear genome sequence of the extinct, giant 'subfossil' koala lemur *Megaladapis edwardsi*.**

Stephanie Marciniak (1), Mehreen R. Mughal (2), Laurie R. Godfrey (3), Richard J. Bankoff (1), Heritiana Randrianatoandro (1,4), Brooke E. Crowley (5), Christina M. Bergey (1,6,7), Kathleen M. Muldoon (8), Jeannot Randrianasy (4), Brigitte M. Raharivololona (4), Stephan C. Schuster (9), Ripan S. Malhi (10), Anne D. Yoder (11), Edward E. Louis Jr. (12)\*, Logan Kistler (13)\*, George H. Perry (1,2,6,14)\*

1. Department of Anthropology, Pennsylvania State University
2. Bioinformatics and Genomics Intercollege Graduate Program, Pennsylvania State University
3. Department of Anthropology, University of Massachusetts, Amherst
4. Mention Anthropobiologie et Développement Durable, Faculté des Sciences, Université d'Antananarivo
5. Departments of Geology and Anthropology, University of Cincinnati
6. Department of Biology, Pennsylvania State University
7. Department of Genetics, Rutgers University
8. Department of Anatomy, Midwestern University
9. Singapore Centre for Environmental Life Sciences Engineering, Nanyang Technological University
10. Departments of Anthropology and Ecology, Evolution and Behavior, Carl R. Woese Institute for Genomic Biology, University of Illinois Urbana-Champaign
11. Departments of Biology and Evolutionary Anthropology, Duke University
12. Department of Conservation Genetics, Omaha's Henry Doorly Zoo and Aquarium
13. Department of Anthropology, National Museum of Natural History, Smithsonian Institution
14. Huck Institutes of the Life Sciences, Pennsylvania State University

\*Corresponding authors: George H. Perry, Logan Kistler, Edward E. Louis Jr.

**Email:** ghp3@psu.edu, KistlerL@si.edu, edlo@omahazoo.com

**This PDF file includes:**

Figures S1 to S11

Tables S1 to S5

SI References

## SUPPLEMENTARY MATERIALS

**Supplementary Figure 1:** Pre- and post-processed read counts for *Megaladapis edwardsi* libraries

**Supplementary Figure 2:** Trimmed and merged read length distributions for *Megaladapis edwardsi* libraries

**Supplementary Figure 3:** *Megaladapis edwardsi* unique read length distributions

**Supplementary Figure 4:** Read length distribution, DNA fragmentation patterns and frequency of nucleotide misincorporation for a subset of *Megaladapis edwardsi* sequence reads

**Supplementary Figure 5:** Proportion of sites reconstructed per gene in the 2X coverage *Megaladapis edwardsi* damage-masked and damage-unmasked nucleotide dataset

**Supplementary Figure 6:** Mean bootstrap support across independent gene trees

**Supplementary Figure 7:** Phylogenetic analyses for tree topology discordance

**Supplementary Figure 8:** Lineage-specific  $d_N/d_S$  ratios for *GHR* and *SULT1C2* (full alignment)

**Supplementary Figure 9:** Phylogenetic relationships of species used in genomic convergence analyses

**Supplementary Figure 10:** *Megaladapis edwardsi* genomic convergence results with *R. roxellana* and *E. equus caballus* (*P. diadema* outgroup)

**Supplementary Figure 11:** *Post-hoc* support for genomic convergence results

**Supplementary Table 1:** Sequence metrics and accession information

**Supplementary Table 2:** Contamination estimates per sequence library

**Supplementary Table 3:** Proportion of genes covered in the 2X damage-masked and no-masked *Megaladapis edwardsi* data set

**Supplementary Table 4:** Full set of genes (n=53) in *M. edwardsi* with  $d_N/d_{S_{genome}} > 1.5$

**Supplementary Table 5:** *Post-hoc* support for *Megaladapis edwardsi* genomic convergence results with *R. roxellana* and *E. equus caballus*.

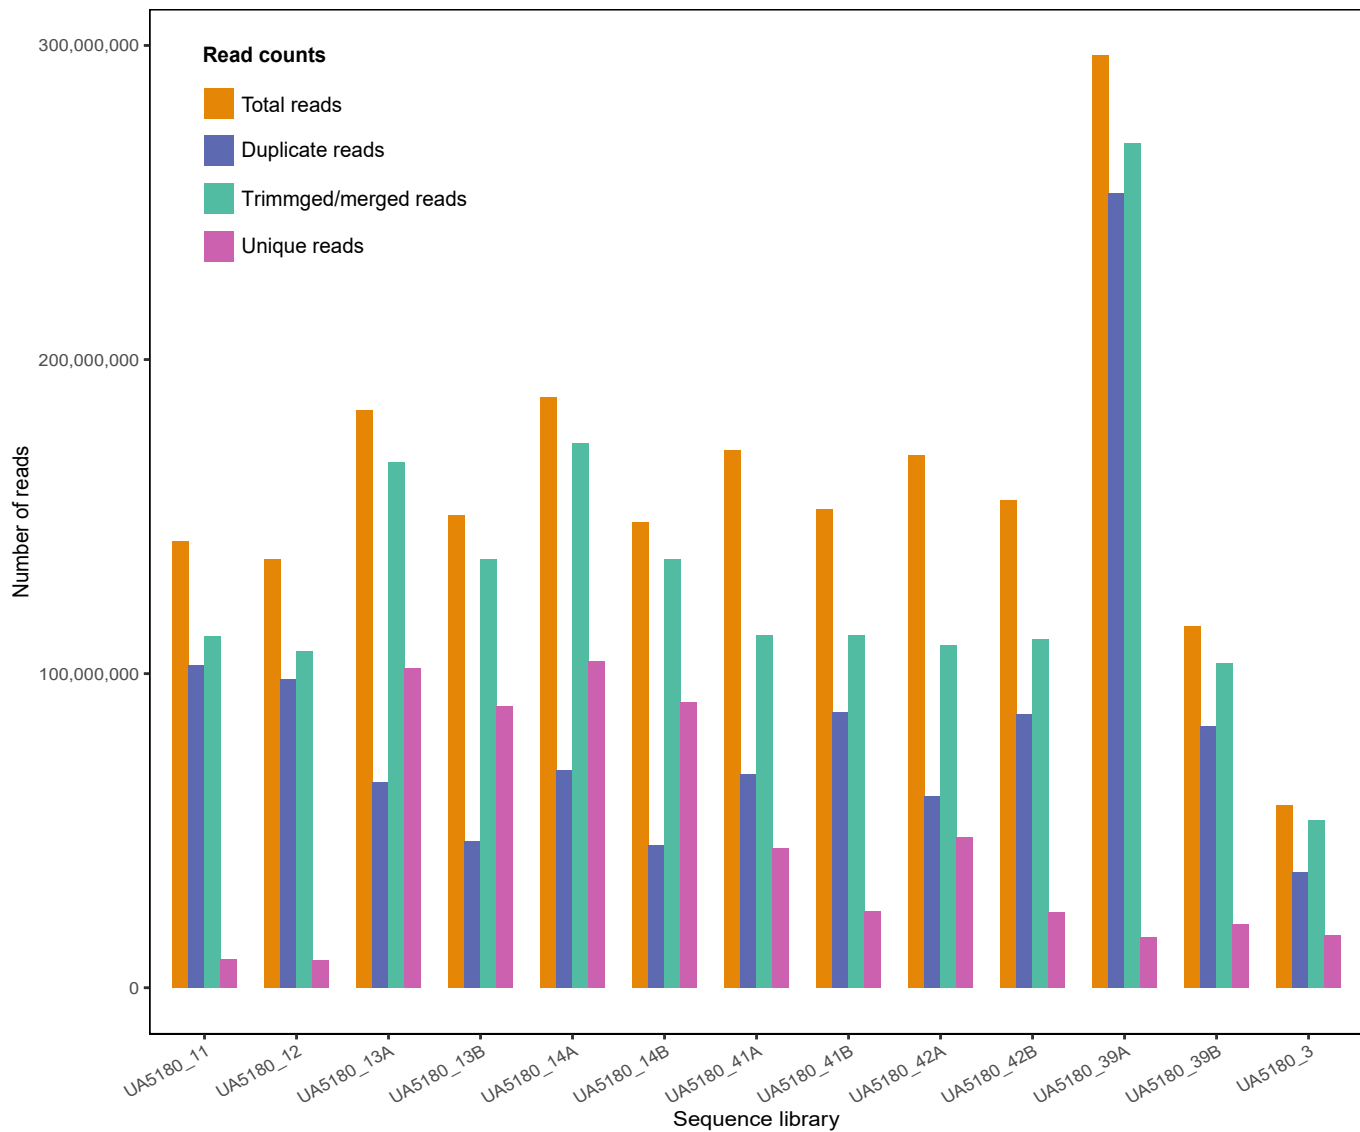

**Fig. S1.** Pre- and post-processed read counts for *Megaladapis edwardsi* libraries. The total counts of pre- and post-processed reads for each *Megaladapis edwardsi* library prepared from sample UA5180. “Total reads” are the raw unprocessed sequence reads; “Duplicate reads” are redundant reads based on the number of trimmed and merged reads per sequencing library; “Trimmed/merged reads” are adaptor-trimmed and merged paired-end reads; “Unique reads” are reads filtered to a minimum of 20 bp and base quality of 20 with duplicates removed.

*Megaladapis edwardsi* UA5180 sequence libraries

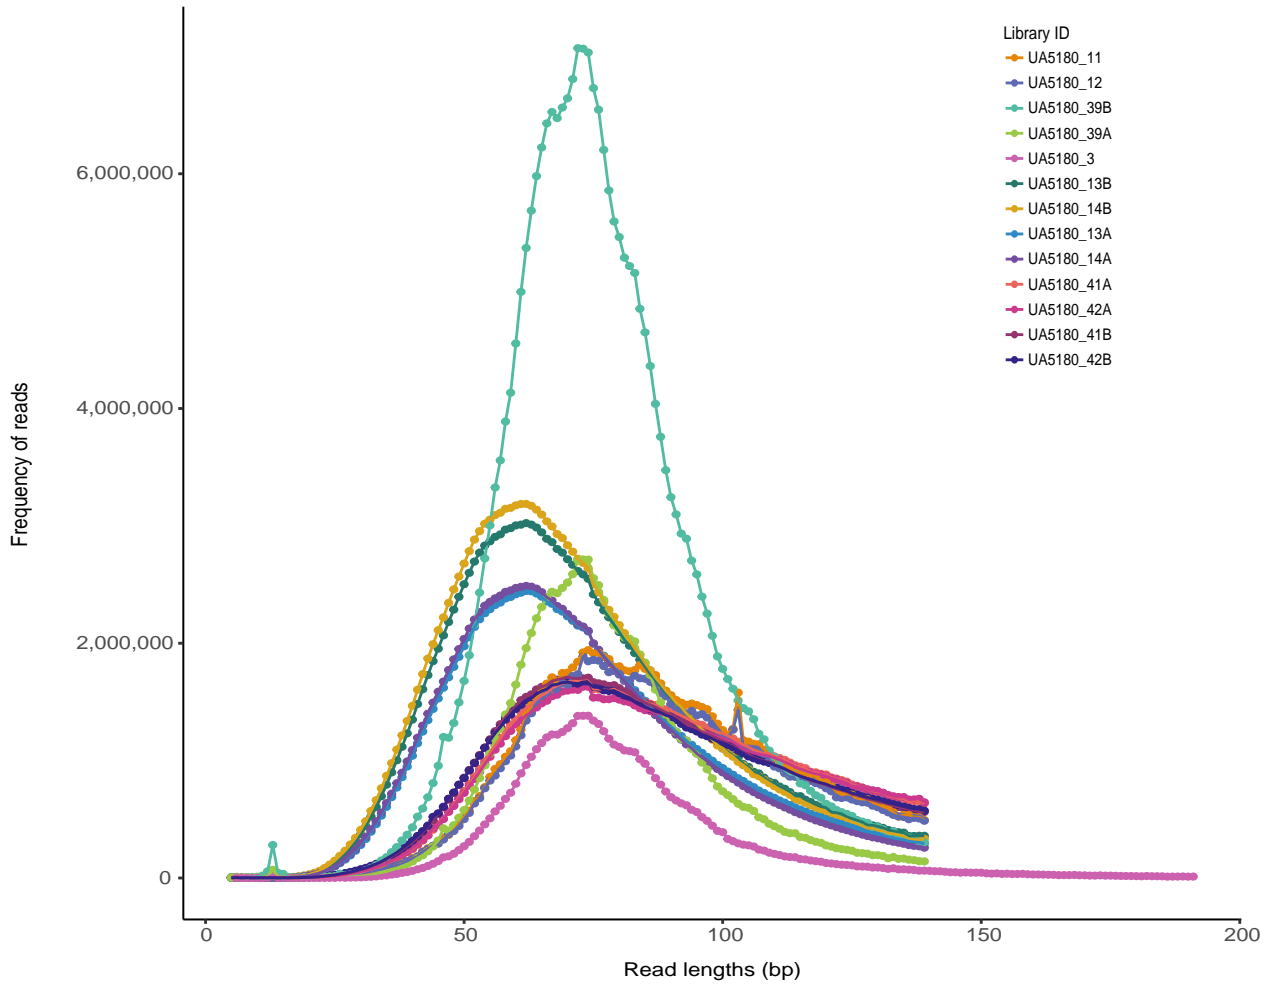

**Fig. S2.** Trimmed and merged read length distributions for *Megaladapis edwardsi* libraries. Read length distributions for trimmed/merged libraries without duplicate removal in each separately sequenced *M. edwardsi* library (n=9 libraries, A and B indicate those libraries sequenced twice).

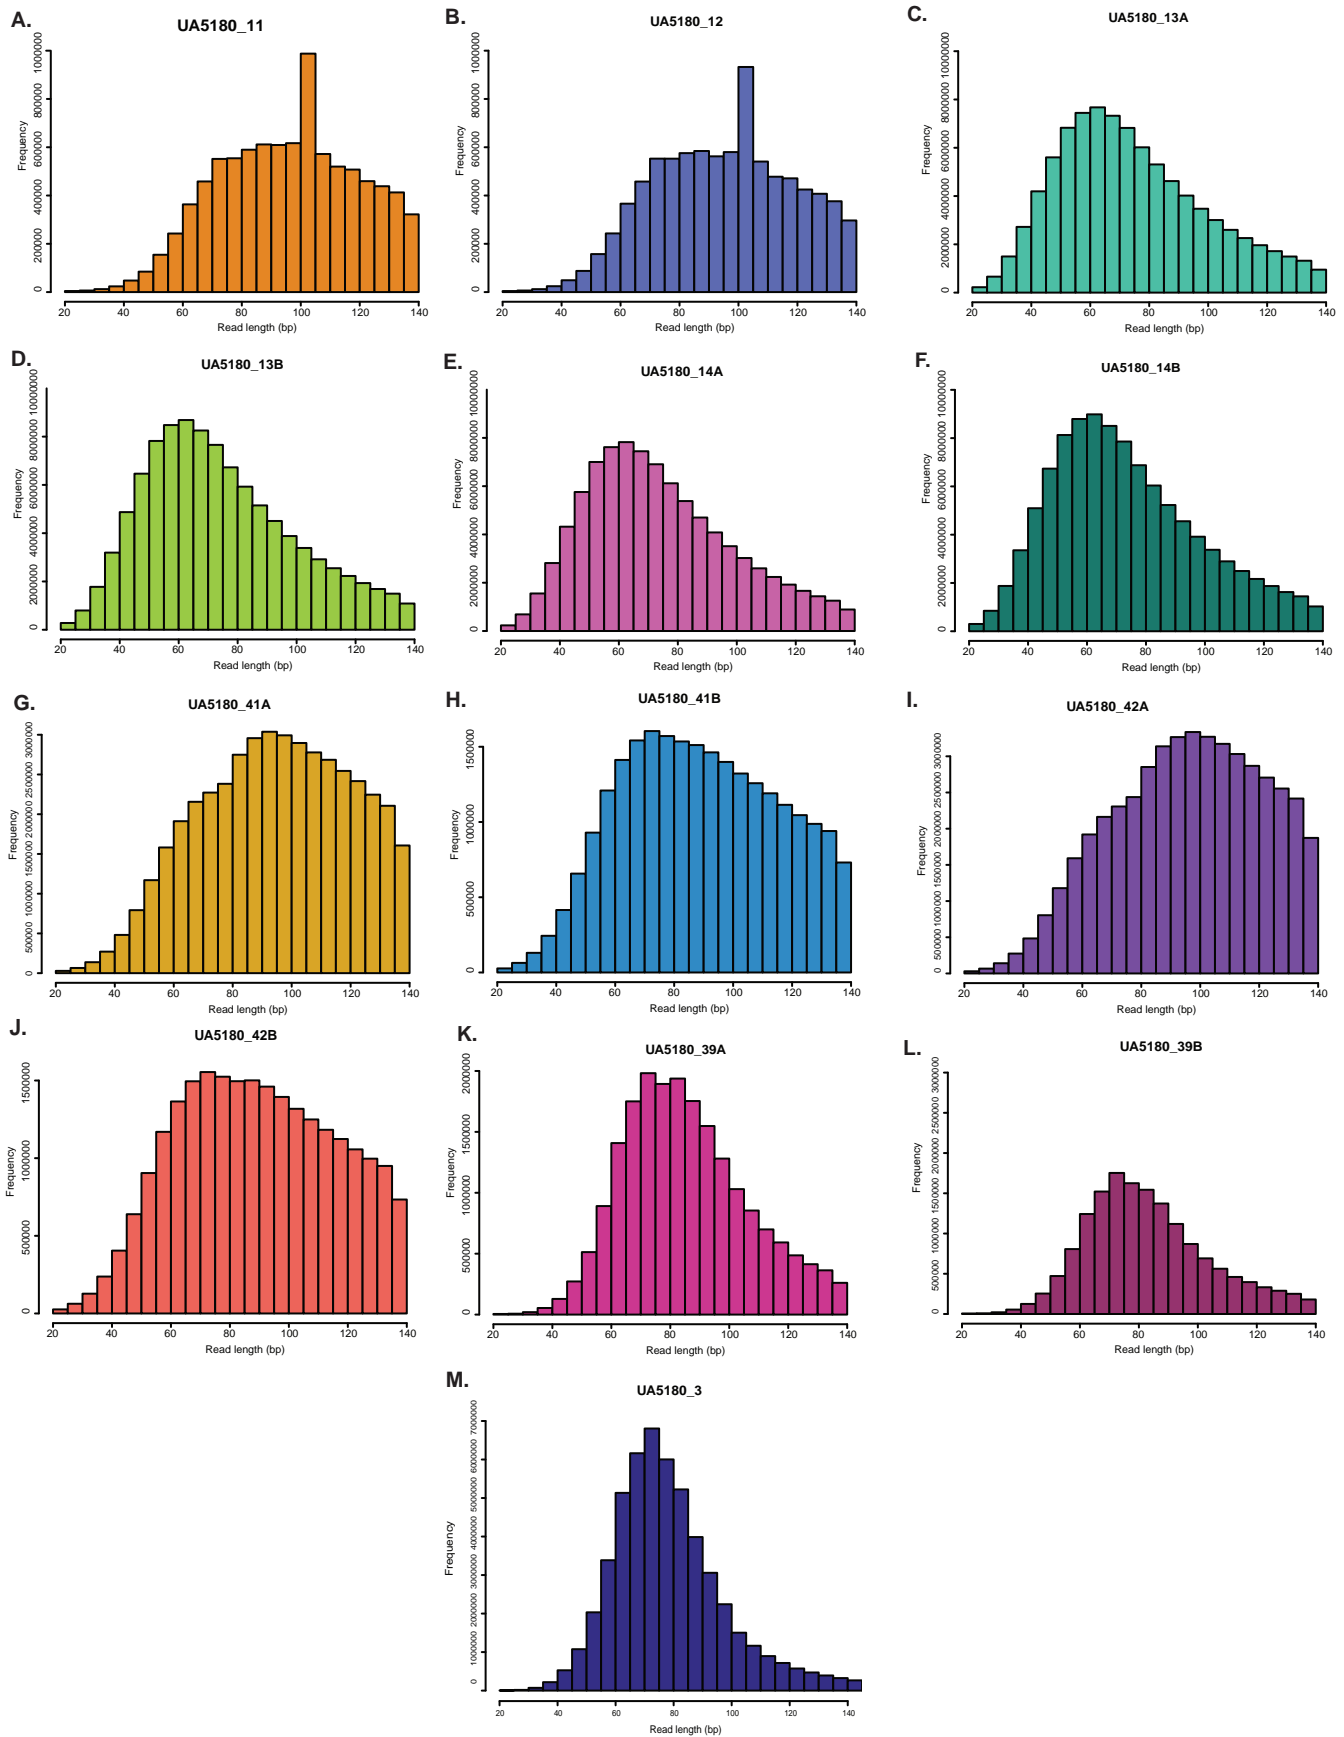

**Fig. S3.** Individual read length distributions for *Megaladapis edwardsi* libraries. Read length distributions (A to M) for quality filtered reads (min. 20bp and quality 20) in each separately sequenced *M. edwardsi* library (n=9 libraries, A and B indicate those libraries sequenced twice).

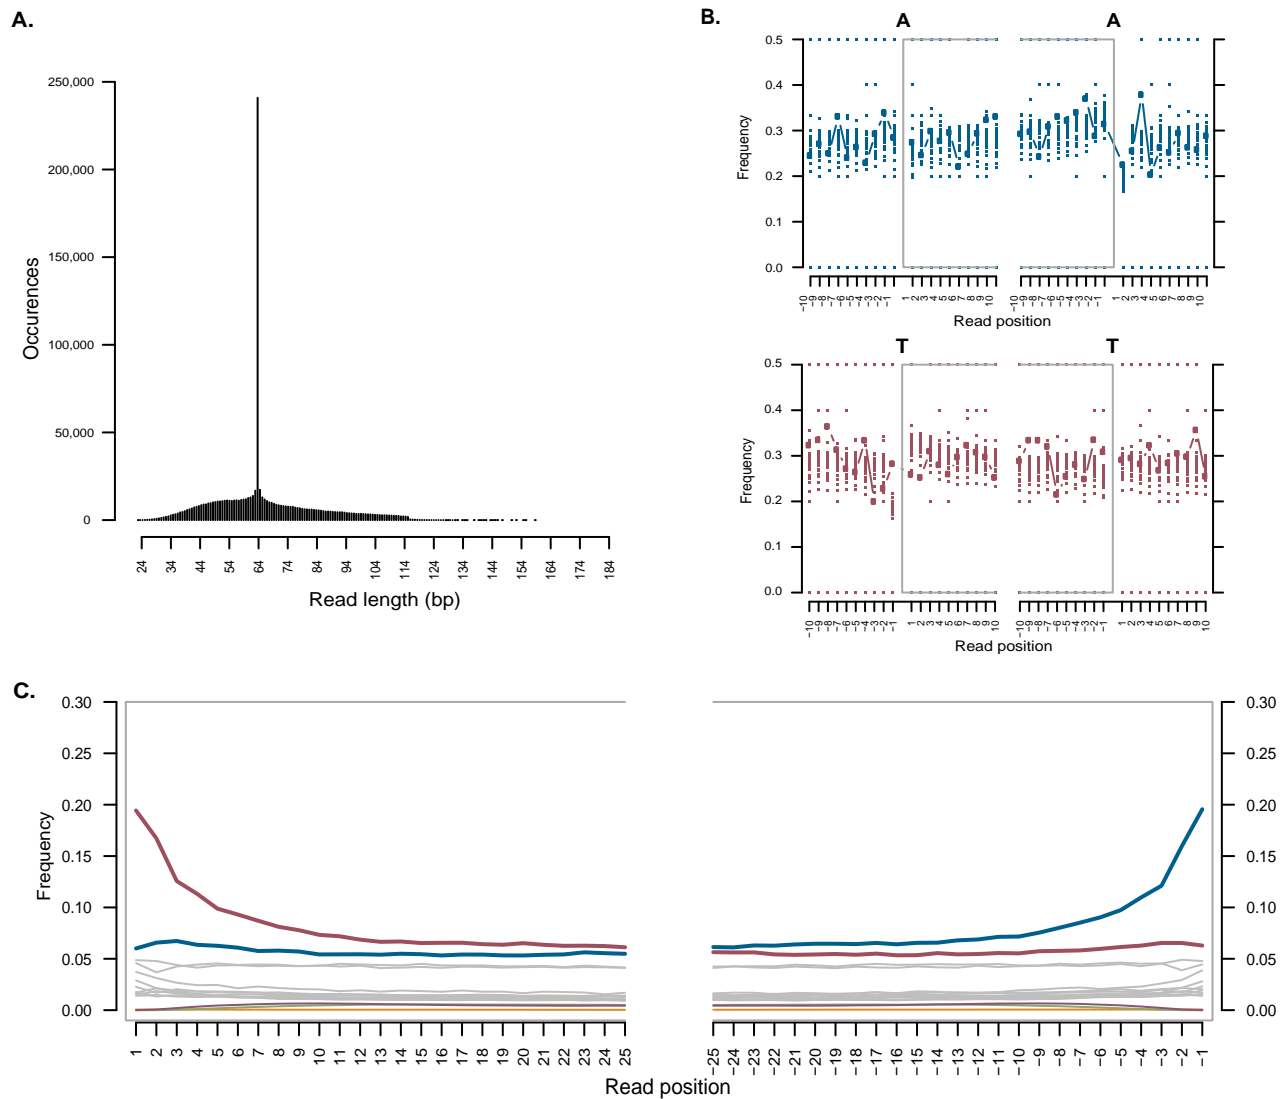

**Fig. S4.** Read length distribution, DNA fragmentation patterns and frequency of nucleotide misincorporation for a subset of *Megaladapis edwardsi* sequence reads. Estimates of post-mortem damage for *Megaladapis edwardsi* were generated from a BAM file of the lastZ1 alignment mapped to a modified version of hg19 (non-exons masked) using mapDamage<sup>2</sup>. A) Histogram of single-end read length distribution. Note, the peak at 64 bp in the fragment size distribution is due to the presence of untrimmed 64 bp single-stranded reads remaining after trimming and merging with an 11 bp overlap. B) Base frequency DNA fragmentation patterns within the read (contained in the grey box) and outside of the read. C) The frequency of nucleotide misincorporation patterns are indicated from the 5' start (left, positive read position numbers) and 3' end (right, negative read position numbers), showing position-specific substitutions: G>A (maroon), C>T (teal), and all other substitutions (grey).

**A.**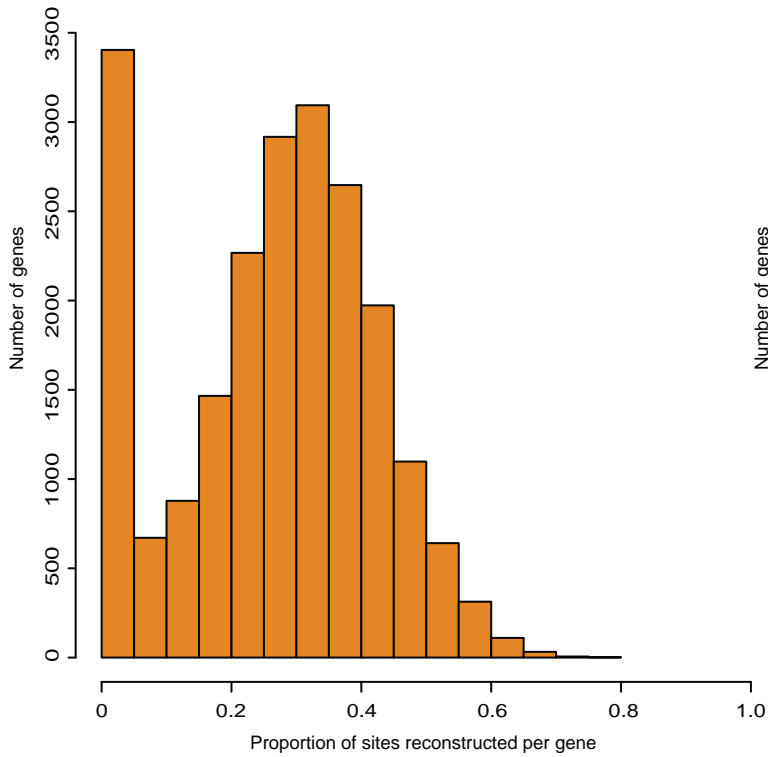**B.**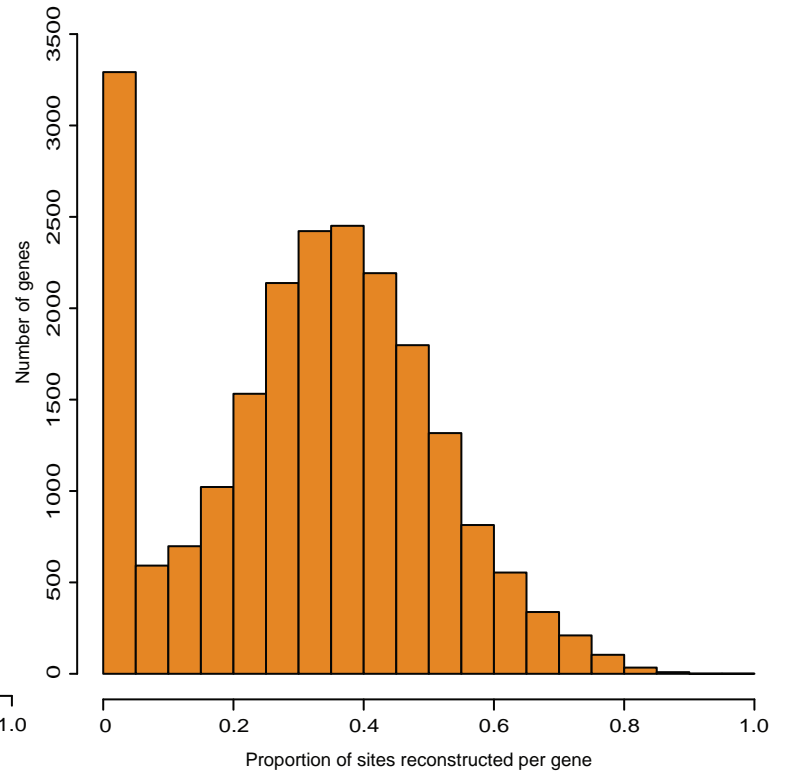

**Fig. S5.** Proportion of sites reconstructed per gene in the 2X coverage *Megaladapis edwardsi* damage-masked and damage-unmasked nucleotide dataset. *Megaladapis edwardsi* genes were called in damage-masked and damage-unmasked 2X coverage exon sets, containing 21,519 genes total. Genes were called at: A) a median of 28.60% of sites in the damage-masked (17,448 genes called at greater than 10% of sites) and, B) median of 33.11% in the damage-unmasked (17,636 genes called at greater than 10% of sites).



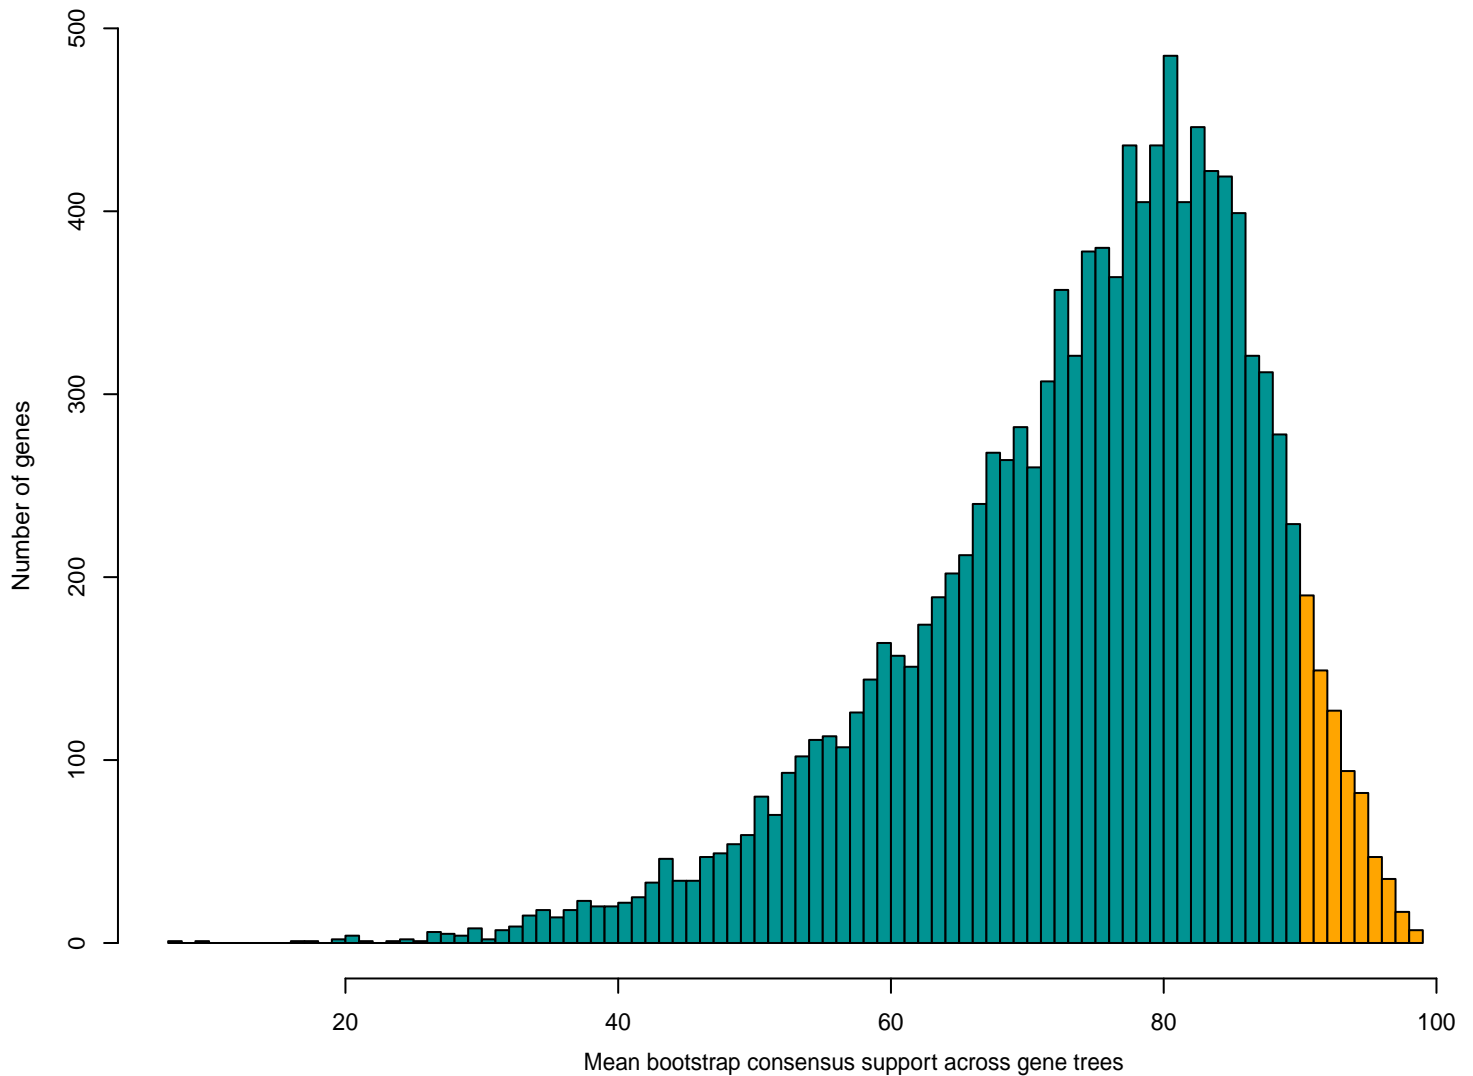

**Fig. S6. Mean bootstrap support across independent gene trees.** Using a database of 11,944 genes with aligned nucleotides present across at least 20% of sites, we estimated independent gene trees (100 bootstrap replicates) using the same model as the full species tree in Figure 1A. The mean level of bootstrap support across all branch bipartitions was calculated as a measure of gene tree phylogenetic signal<sup>3</sup>. The overall average mean bootstrap support value was 74.10% (s.d. = 12.65%; range = 7.69% to 98.85%). Highlighted in orange is the mean bootstrap support that exceeds 90%, representing 771 “strong phylogenetic signal” gene trees.

A.

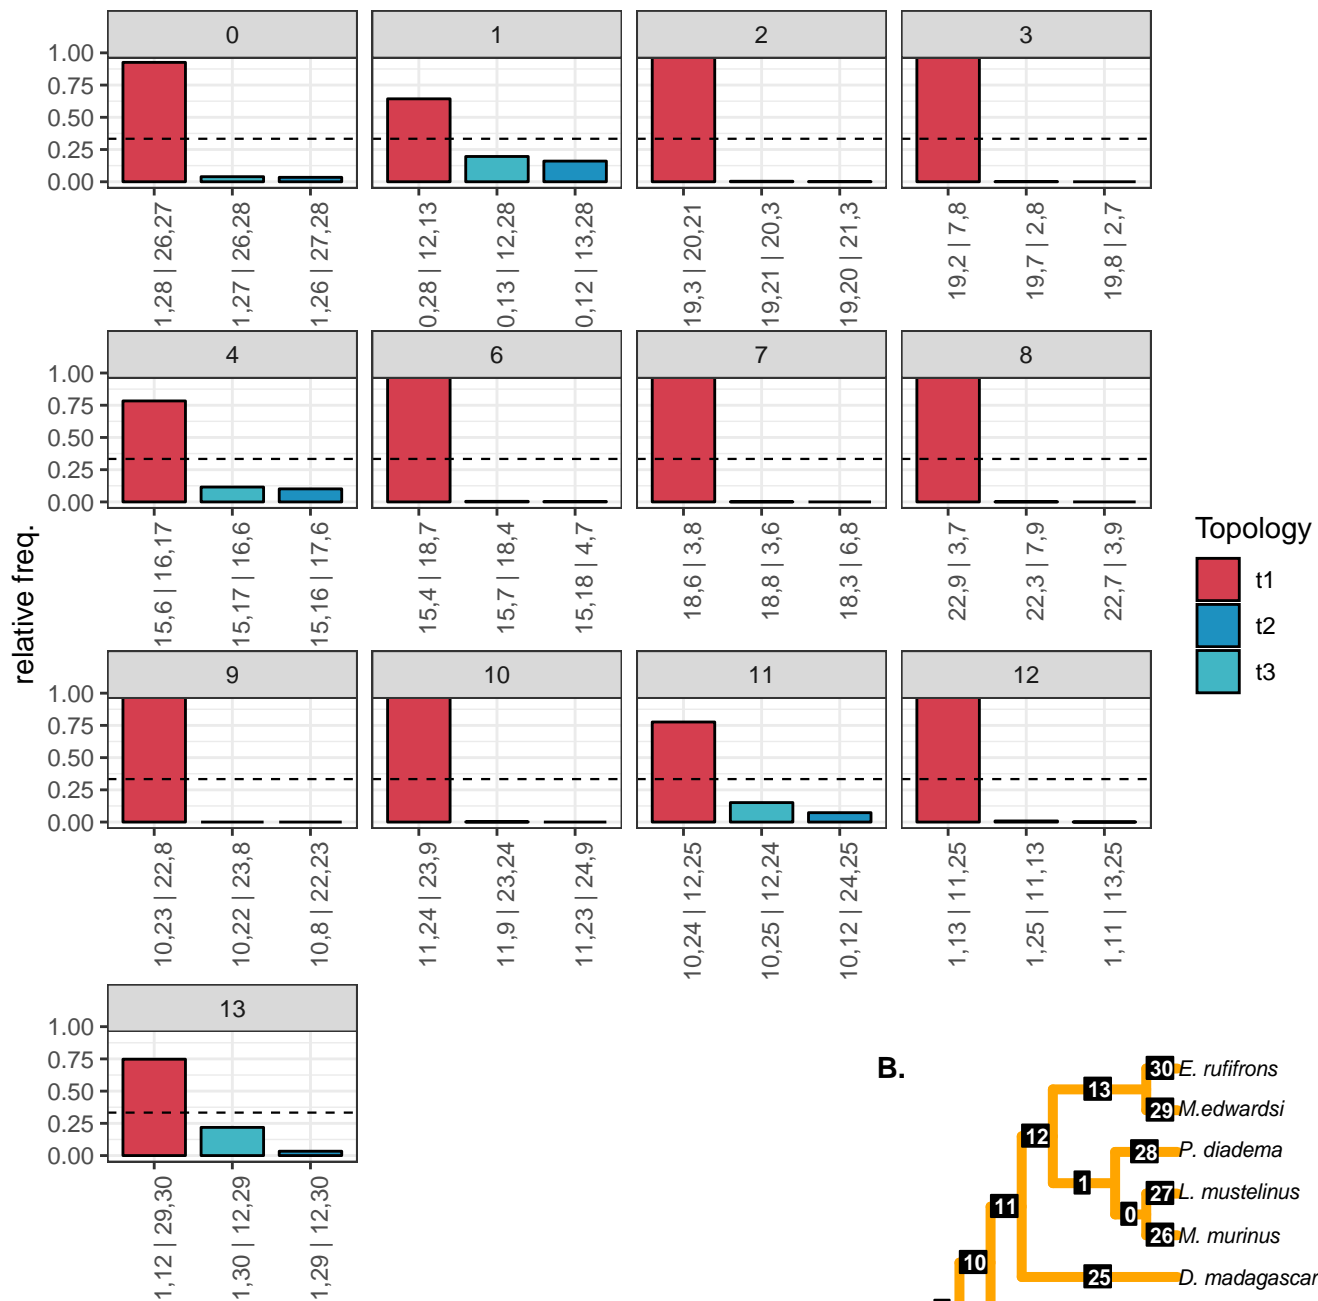

B.

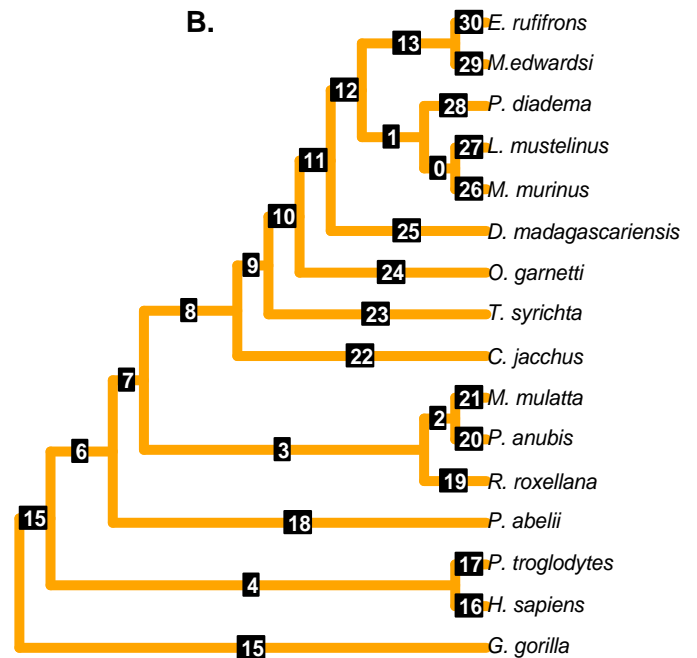

**Fig. S7.** Phylogenetic analyses for tree topology discordance. ASTRAL-II<sup>4</sup> and DiscoVista<sup>5</sup> relative frequency analysis of gene tree discordance. A) Gene-tree quartet configurations reflecting each focal internal branch with the main topology indicated in red and two alternative topologies in blue and, B) Tree topology generated by ASTRAL-II using DiscoVista.

**A.** *GHR* lineage-specific  $d_N/d_{S_{genome}}$  ratios

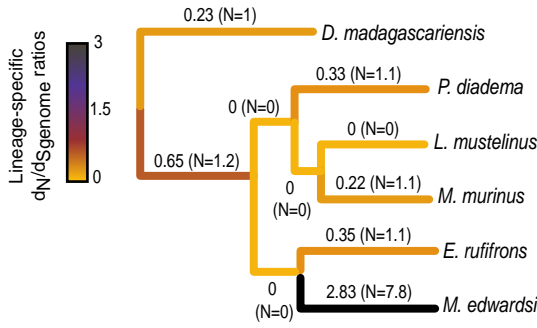

**GHR variable amino acid positions**

|                            | 5 | 6 | 8 | 9 | 10 | 41 | 43 | 45 | 62 | 63 | 70 | 71 | 72 | 73 | 74 | 76 | 77 | 78 | 80 | 81 |
|----------------------------|---|---|---|---|----|----|----|----|----|----|----|----|----|----|----|----|----|----|----|----|
| <i>D. madagascariensis</i> | Q | L | L | T | L  | P  | L  | T  | E  | T  | D  | G  | V  | H  | H  | L  | K  | S  | G  | S  |
| <i>P. diadema</i>          | . | . | . | . | .  | .  | .  | .  | .  | .  | .  | .  | .  | .  | .  | .  | .  | .  | H  | .  |
| <i>L. mustelinus</i>       | . | . | . | . | .  | .  | .  | .  | .  | .  | .  | .  | .  | .  | .  | .  | .  | .  | H  | .  |
| <i>M. murinus</i>          | . | . | . | . | .  | .  | .  | .  | .  | .  | .  | .  | E  | .  | .  | .  | .  | .  | H  | .  |
| <i>E. rufifrons</i>        | . | . | . | . | .  | .  | .  | .  | .  | .  | .  | .  | .  | .  | .  | .  | .  | .  | H  | .  |
| <i>M. edwardsi</i>         | . | . | . | . | .  | .  | .  | .  | .  | .  | .  | E  | .  | .  | .  | T  | .  | N  | .  | P  |

  

|                            | 82 | 83 | 84 | 85 | 86 | 87 | 153 | 154 | 155 | 157 | 162 | 163 | 164 | 166 | 168 | 169 | 170 | 171 | 172 | 173 |
|----------------------------|----|----|----|----|----|----|-----|-----|-----|-----|-----|-----|-----|-----|-----|-----|-----|-----|-----|-----|
| <i>D. madagascariensis</i> | V  | Q  | L  | F  | Y  | I  | I   | G   | L   | W   | I   | S   | L   | G   | H   | A   | D   | I   | Q   | V   |
| <i>P. diadema</i>          | .  | .  | .  | .  | .  | .  | .   | .   | .   | .   | .   | .   | .   | .   | .   | .   | .   | .   | .   | .   |
| <i>L. mustelinus</i>       | .  | .  | .  | .  | .  | .  | .   | .   | .   | .   | .   | .   | .   | .   | .   | .   | .   | .   | .   | .   |
| <i>M. murinus</i>          | .  | .  | .  | .  | .  | .  | .   | .   | .   | .   | .   | .   | .   | .   | .   | .   | .   | .   | .   | .   |
| <i>E. rufifrons</i>        | .  | .  | .  | .  | .  | .  | S   | .   | .   | .   | .   | .   | .   | .   | .   | .   | .   | .   | .   | .   |
| <i>M. edwardsi</i>         | I  | .  | .  | .  | .  | T  | .   | .   | .   | .   | .   | .   | .   | .   | .   | .   | .   | .   | .   | .   |

  

|                            | 186 | 187 | 207 | 210 | 211 | 234 | 235 | 236 | 237 | 238 | 239 | 240 | 243 | 249 | 251 | 252 |
|----------------------------|-----|-----|-----|-----|-----|-----|-----|-----|-----|-----|-----|-----|-----|-----|-----|-----|
| <i>D. madagascariensis</i> | G   | W   | M   | V   | L   | Q   | R   | N   | S   | E   | K   | Y   | F   | V   | L   | P   |
| <i>P. diadema</i>          | .   | .   | .   | .   | .   | .   | .   | .   | .   | .   | .   | .   | .   | .   | I   | .   |
| <i>L. mustelinus</i>       | .   | .   | .   | .   | .   | .   | .   | .   | .   | .   | .   | .   | .   | .   | .   | .   |
| <i>M. murinus</i>          | .   | .   | .   | .   | .   | .   | .   | .   | .   | .   | .   | .   | .   | .   | .   | .   |
| <i>E. rufifrons</i>        | .   | .   | .   | .   | .   | .   | .   | .   | .   | .   | .   | .   | .   | .   | .   | .   |
| <i>M. edwardsi</i>         | .   | .   | .   | .   | .   | .   | .   | .   | .   | .   | .   | .   | .   | .   | .   | .   |

**B.** *SULT1C2* lineage-specific  $d_N/d_{S_{genome}}$  ratios

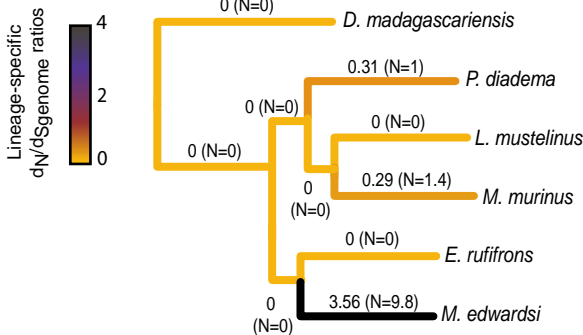

**SULT1C2 variable amino acid positions**

|                            | 38 | 39 | 40 | 41 | 42 | 43 | 45 | 46 | 47 | 54 | 56 | 59 | 61 | 66 | 67 | 68 | 70 | 72 | 74 | 138 |
|----------------------------|----|----|----|----|----|----|----|----|----|----|----|----|----|----|----|----|----|----|----|-----|
| <i>D. madagascariensis</i> | K  | P  | D  | D  | L  | L  | C  | T  | Y  | W  | Q  | V  | M  | G  | D  | V  | K  | Q  | A  | L   |
| <i>P. diadema</i>          | .  | .  | .  | .  | .  | .  | .  | .  | .  | .  | .  | .  | .  | .  | .  | .  | M  | .  | .  | .   |
| <i>L. mustelinus</i>       | .  | .  | .  | .  | .  | .  | .  | .  | .  | .  | .  | .  | .  | .  | .  | .  | .  | .  | .  | .   |
| <i>M. murinus</i>          | .  | .  | .  | .  | .  | .  | .  | .  | .  | .  | .  | .  | .  | .  | .  | .  | .  | .  | .  | .   |
| <i>E. rufifrons</i>        | .  | .  | .  | .  | .  | .  | .  | .  | .  | .  | .  | .  | .  | .  | .  | .  | .  | .  | .  | .   |
| <i>M. edwardsi</i>         | .  | .  | E  | H  | V  | .  | Y  | .  | .  | .  | .  | .  | .  | .  | .  | .  | L  | .  | .  | .   |

  

|                            | 143 | 145 | 154 | 155 | 162 | 164 | 177 | 186 | 235 | 237 | 238 | 239 | 243 | 244 | 248 | 249 | 250 | 254 | 255 | 259 |
|----------------------------|-----|-----|-----|-----|-----|-----|-----|-----|-----|-----|-----|-----|-----|-----|-----|-----|-----|-----|-----|-----|
| <i>D. madagascariensis</i> | N   | K   | D   | Q   | P   | P   | G   | D   | I   | Q   | E   | T   | K   | M   | P   | M   | T   | T   | I   | I   |
| <i>P. diadema</i>          | .   | .   | .   | .   | .   | .   | .   | .   | .   | .   | .   | .   | .   | .   | .   | .   | .   | .   | .   | .   |
| <i>L. mustelinus</i>       | .   | .   | .   | .   | .   | .   | .   | .   | .   | .   | .   | .   | .   | .   | .   | .   | .   | .   | .   | .   |
| <i>M. murinus</i>          | .   | .   | .   | .   | .   | .   | .   | .   | .   | .   | .   | .   | .   | .   | .   | .   | .   | .   | .   | .   |
| <i>E. rufifrons</i>        | .   | .   | .   | .   | .   | .   | .   | .   | .   | .   | .   | .   | .   | .   | .   | .   | .   | .   | .   | .   |
| <i>M. edwardsi</i>         | .   | .   | .   | .   | .   | .   | .   | .   | .   | .   | .   | .   | .   | .   | I   | .   | M   | A   | .   | .   |

  

|                            | 260 | 263 | 265 | 283 | 286 | 287 | 289 | 291 |
|----------------------------|-----|-----|-----|-----|-----|-----|-----|-----|
| <i>D. madagascariensis</i> | L   | S   | S   | A   | E   | R   | E   | I   |
| <i>P. diadema</i>          | .   | .   | .   | .   | .   | .   | .   | .   |
| <i>L. mustelinus</i>       | .   | .   | .   | .   | .   | .   | .   | .   |
| <i>M. murinus</i>          | .   | .   | .   | .   | I   | .   | .   | .   |
| <i>E. rufifrons</i>        | .   | .   | .   | .   | .   | .   | .   | .   |
| <i>M. edwardsi</i>         | V   | .   | .   | .   | .   | .   | .   | .   |

**Fig. S8.** Lineage-specific  $d_N/d_S$  ratios for *GHR* and *SULT1C2* (full alignment). Using a maximum likelihood approach implemented in PAML<sup>6</sup>, lineage-specific ratios of the rates ( $d$ ) of nonsynonymous (N) vs. synonymous (S) substitution along ancestral and terminal branches estimated with a maximum likelihood-based approach for A) the growth hormone receptor (*GHR*) and B) sulfotransferase 1C2 (*SULT1C2*) genes. For each branch, the  $d_S$  denominator is based on the genome-wide synonymous substitution rate.  $d_N/d_{S_{genome}}$  estimates are recorded next to each branch and depicted by the heatmap. The estimated number of N substitutions for each branch are reported within the parentheses. Branch lengths shown are based on those from Figure 1A rather than these individual genes. For each gene, alignments of inferred amino acid residues for the encoded proteins are shown for all variable positions. Amino acid residues identical to those for *D. madagascariensis* are depicted with “.” and amino acid position numbers are based on the human reference sequence (hg19/GRCh37).

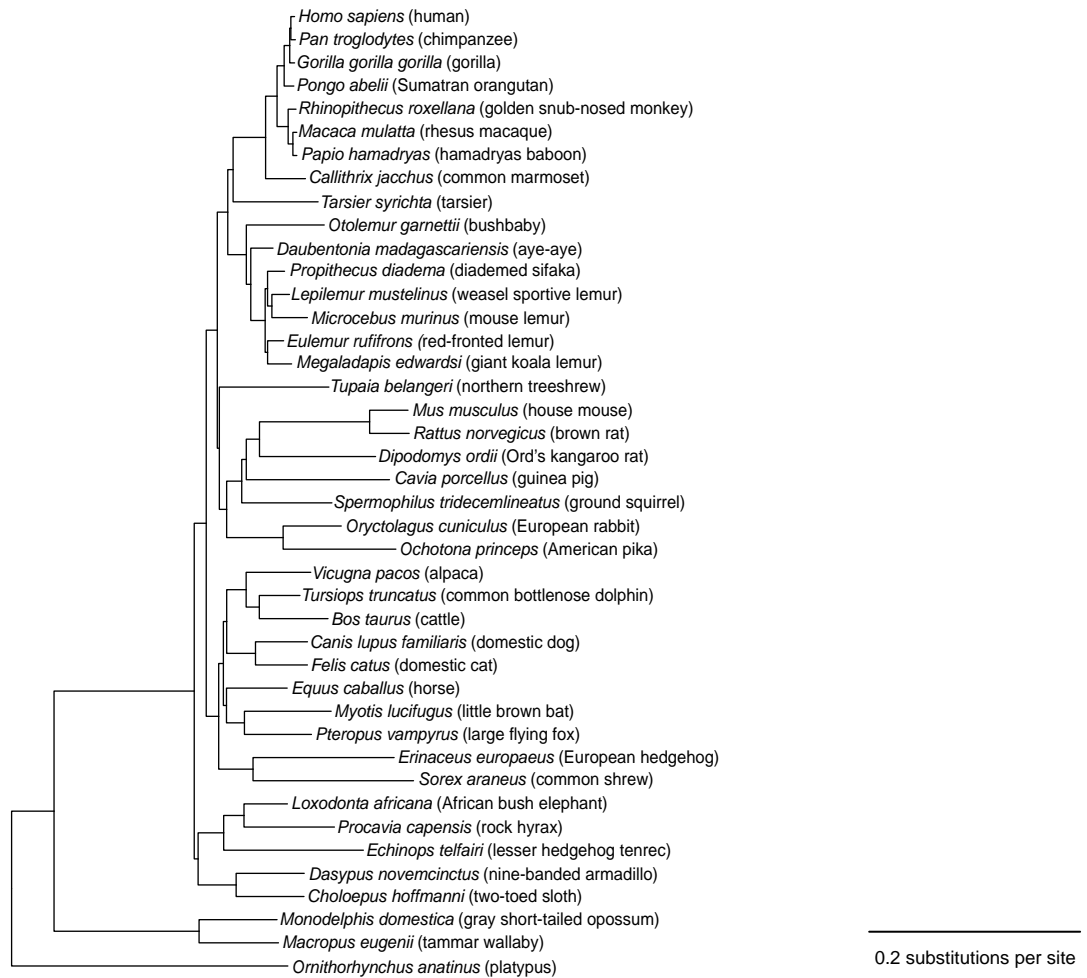

**Fig. S9.** Phylogenetic relationships of species used in genomic convergence analyses. Phylogenetic representation of the species from the 46-way UCSC vertebrate alignment<sup>7</sup> joined with the newly sequenced *M. edwardsi*, extant lemurs and colobine<sup>8</sup>. For the convergence analyses, the nucleotide alignments were translated into amino acids, and queried for all possible convergences between species.

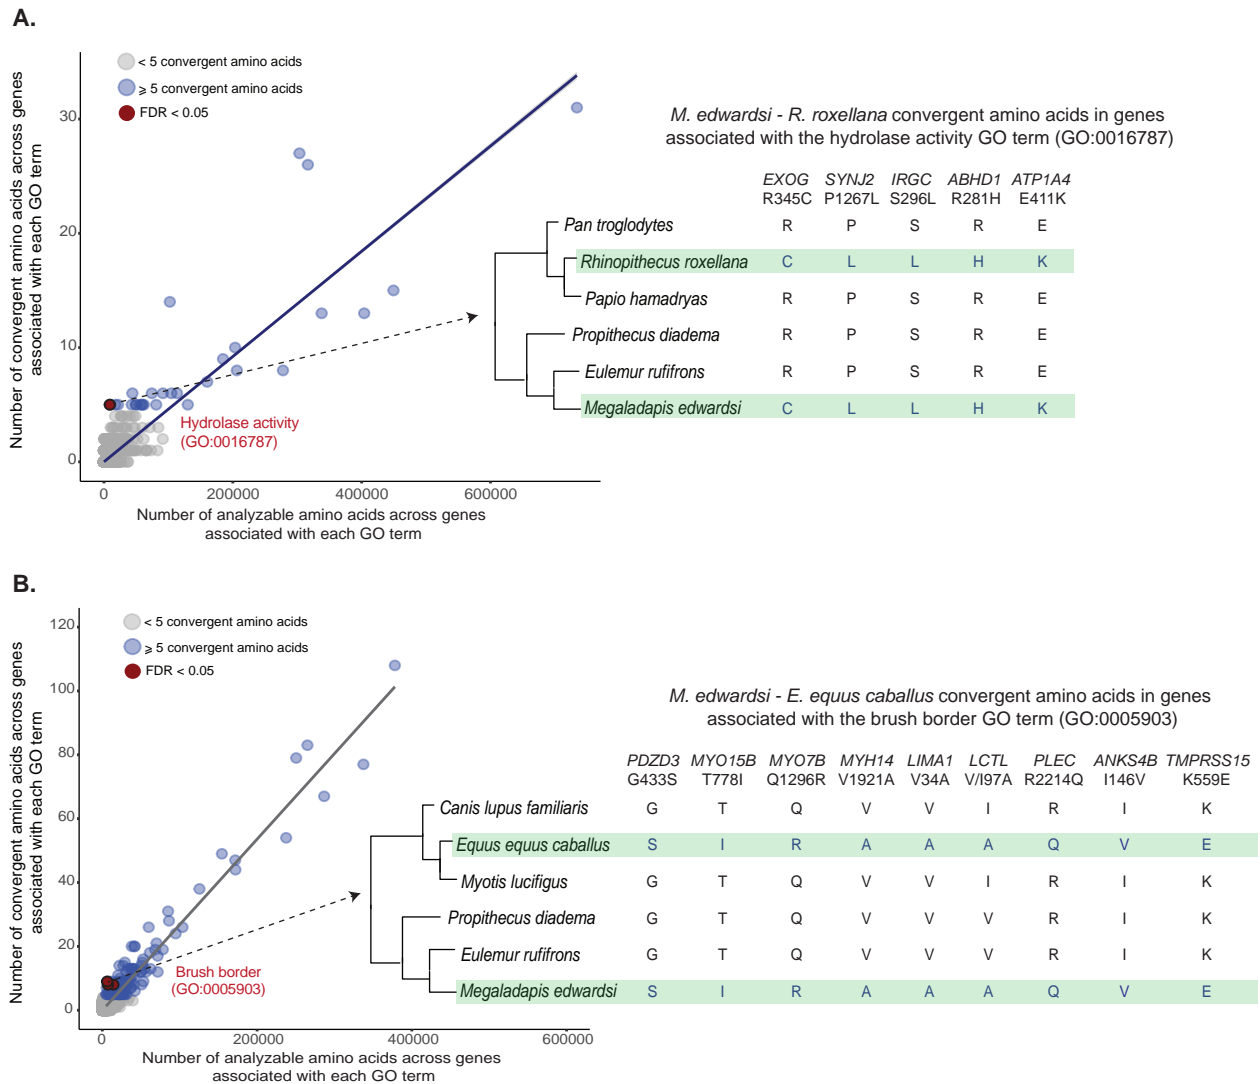

**Fig. S10.** *Megaladapis edwardsi* genomic convergence results with *R. roxellana* and *E. equus caballus* (*P. diadema* outgroup). Results from scans to identify Gene Ontology (GO) functional categories with unusual proportions (relative to genome-wide expectations) of inferred convergent amino acid positions<sup>9</sup> between A) *M. edwardsi* and the folivore *R. roxellana* and B) *M. edwardsi* and the herbivore *E. equus caballus*. Convergent positions are those with identical residues between *M. edwardsi* and the comparison species, but for which the sister and an outgroup species (for each of the comparison species) share a distinct amino acid residue (shown at right). At left, the number of analyzable amino acid positions and convergent amino acid positions for each GO term. For terms with  $\geq 5$  convergent amino acids we tested whether the proportion of convergent sites was significantly different than expected based on the genome-wide ratio and computed false discovery rates (FDR)<sup>10</sup> to account for the multiple tests. For two highlighted GO terms, all convergent amino acid positions between *M. edwardsi* and the comparison species along with gene name and position (based on the human reference sequence) are shown.

**A.** Proportion of convergent amino acids in the brush border (GO:005903) category relative to the proportion of sites possible genome-wide. Faded circles represent non-*Megaladapis* species pairs and *M. edwardsi-Equus caballus* is represented by an opaque circle.

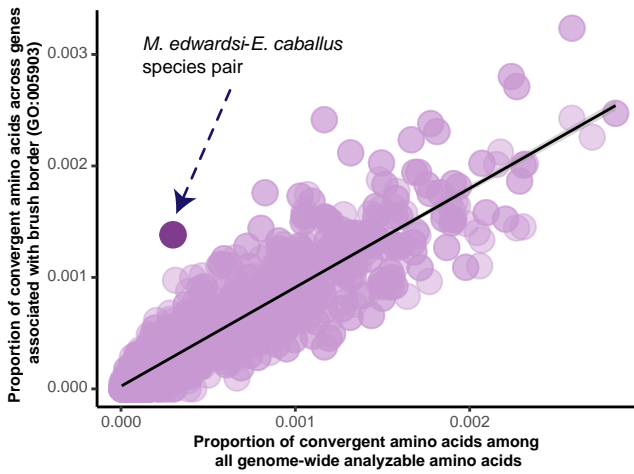

**B.** Frequency of convergence in the brush border category (GO:005903) for non-*Megaladapis* species pairs (n=1,856 comparisons). Each bar represents the frequency of p-value occurrence.

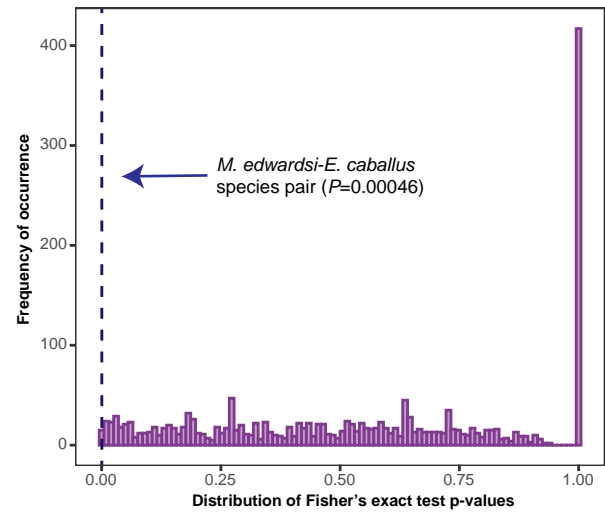

**C.** Proportion of convergent amino acids in the hydrolase activity (GO:0016787) category relative to the proportion of sites possible genome-wide. Faded circles represent non-*Megaladapis* species pairs and *M. edwardsi-Rhinopithecus roxellana* is represented by an opaque circle.

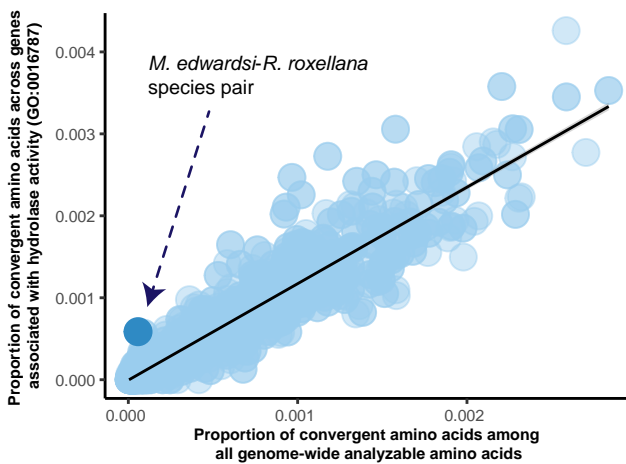

**D.** Frequency of convergence in the hydrolase activity category (GO:0016787) for non-*Megaladapis* species pairs (n=1,856 comparisons). Each bar represents the frequency of p-value occurrence.

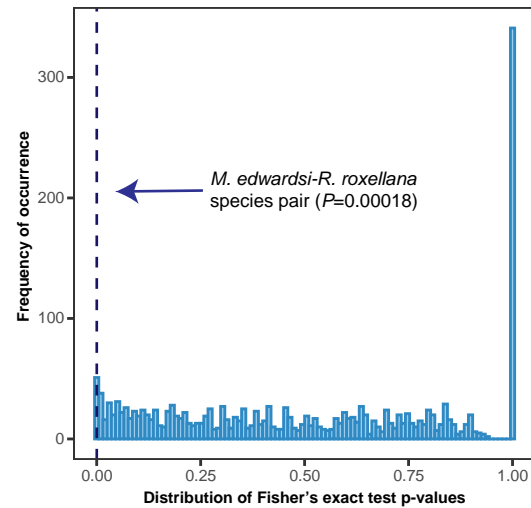

**Fig. S11. Post-hoc support for genomic convergence results.** A post-hoc analysis identifying the numbers of convergent and analyzable amino acid positions are shown for GO: 0005903 (brush border) and GO:0016787 (hydrolase activity) categories and also genome-wide for all possible taxonomic comparisons (excluding those involving *Megaladapis*) from the multi-species alignment (n=1,856). The ratios of the proportions of GO category:genome wide convergent evolution (A and C) and the Fisher's exact test p-values (B and D) are represented for *Megaladapis-Equus* and *Megaladapis-Rhinopithecus* species pairs.

**Table S1. Sequence metrics and accession information**

***Megaladapis edwardsi* shotgun sequenced libraries**

| Taxon                       | Sample ID | Site    | Tissue   | Cal Yrs. BP | Library ID  | Master ID  | Total reads | Merged reads* | Unique reads** | % Unique reads | Duplicate reads*** | Duplicate reads (%) |
|-----------------------------|-----------|---------|----------|-------------|-------------|------------|-------------|---------------|----------------|----------------|--------------------|---------------------|
| <i>Megaladapis edwardsi</i> | UA5180    | Anavoha | Mandible | 1546-1410   | Bar13_Dec   | UA5180_13A | 183,815,699 | 167,293,010   | 101,759,510    | 55.36          | 65,533,500         | 39.17               |
|                             |           |         |          |             | Bar13_June  | UA5180_13B | 150,289,729 | 136,466,616   | 89,752,467     | 59.72          | 46,714,149         | 34.23               |
|                             |           |         |          |             | Bar14_Dec   | UA5180_14A | 187,934,336 | 173,244,552   | 103,995,978    | 55.34          | 69,248,574         | 39.97               |
|                             |           |         |          |             | Bar14_June  | UA5180_14B | 148,344,892 | 136,385,993   | 90,997,592     | 61.34          | 45,388,401         | 33.28               |
|                             |           |         |          |             | Bar41_July  | UA5180_41A | 171,073,138 | 112,145,675   | 44,267,729     | 25.88          | 67,877,946         | 60.53               |
|                             |           |         |          |             | Bar41_Nov   | UA5180_41B | 152,387,056 | 112,120,011   | 24,303,403     | 15.95          | 87,816,608         | 78.32               |
|                             |           |         |          |             | Bar42_July  | UA5180_42A | 169,686,911 | 108,941,131   | 47,878,427     | 28.22          | 61,062,704         | 56.05               |
|                             |           |         |          |             | Bar42_Nov   | UA5180_42B | 155,204,251 | 110,990,589   | 23,972,353     | 15.45          | 87,018,236         | 78.40               |
|                             |           |         |          |             | Bar11       | UA5180_11  | 142,059,057 | 111,797,291   | 9,151,117      | 6.44           | 102,646,174        | 91.81               |
|                             |           |         |          |             | Bar12       | UA5180_12  | 136,491,202 | 107,080,700   | 8,743,143      | 6.41           | 98,337,557         | 91.83               |
|                             |           |         |          |             | PJX039_June | UA5180_39A | 296,737,001 | 268,882,310   | 15,958,787     | 5.38           | 252,923,523        | 94.06               |
|                             |           |         |          |             | PJX039_May  | UA5180_39B | 115,052,998 | 103,300,322   | 20,144,369     | 17.51          | 83,155,953         | 80.50               |
|                             |           |         |          |             | Bar3        | UA5180_3   | 58,218,887  | 53,466,704    | 16,751,896     | 28.77          | 36,714,808         | 68.67               |

\*Merged reads are adaptor-trimmed and merged paired-end reads, without duplicates removed

\*\*Unique reads are reads filtered to min 20bp, quality 20 and duplicates removed

\*\*\*Duplicate reads are redundant reads based on the difference between the raw trimmed/merged reads and trimmed/merged reads with duplicates removed

**Extant lemurs shotgun sequenced libraries**

| Taxon                       | Sample ID | Site       | Tissue    | Date  | Library ID | Total reads | Unique reads* | Average depth** |
|-----------------------------|-----------|------------|-----------|-------|------------|-------------|---------------|-----------------|
| <i>Eulemur rufifrons</i>    | RAN05.15  | Ranomafana | Ear punch | ~2016 | Eulemur_S1 | 393,469,627 | 5,279,482     | 7.55 (+/- 7.02) |
|                             | ISA2.23   | Isalo      | Ear punch | ~2016 | Eulemur_S2 | 392,627,766 |               |                 |
| <i>Lepilemur mustelinus</i> | TVY7.125  | Runhua     | Ear punch | ~2016 | Lepilemur  | 172,058,967 | 6,145,696     | 6.40 (+/-5.85)  |

\*Unique reads are reads remaining after adapter trimming and read merging, filtered to min 20bp

\*\*Average depth calculated using SAMtools depth

**Accessions for lemurs and colobine used in analyses**

| Taxon                               | BioProject Accession |
|-------------------------------------|----------------------|
| <i>Daubentonia madagascariensis</i> | SRA043766.1          |
| <i>Propithecus diadema</i>          | PRJNA317769          |
| <i>Rhinopithecus roxellana</i>      | PRJNA230020          |
| <i>Microcebus murinus</i>           | PRJNA285159          |

**Table S2. Contamination estimates across libraries**

| Taxon                       | Sample ID | Library ID  | Master ID  | Total reads | Merged reads* | Mapped reads ( <i>M. edwardsi</i> mtDNA, NC_026088)** | Mapped reads (haplotype H6A1; EU256375)** | Overlapping (shared) reads*** | Reads unique to human**** | % contamination estimate |
|-----------------------------|-----------|-------------|------------|-------------|---------------|-------------------------------------------------------|-------------------------------------------|-------------------------------|---------------------------|--------------------------|
| <i>Megaladapis edwardsi</i> | UA5180    | Bar13_Dec   | UA5180_13A | 183,815,699 | 167,293,010   | 38,921                                                | 1,110                                     | 319                           | 791                       | 2.0                      |
|                             |           | Bar13_June  | UA5180_13B | 150,289,729 | 136,466,616   | 31,918                                                | 1,004                                     | 285                           | 719                       | 1.8                      |
|                             |           | Bar14_Dec   | UA5180_14A | 187,934,336 | 173,244,552   | 41,069                                                | 1,118                                     | 320                           | 798                       | 2.5                      |
|                             |           | Bar14_June  | UA5180_14B | 148,344,892 | 136,385,993   | 32,158                                                | 958                                       | 275                           | 683                       | 2.1                      |
|                             |           | Bar41_July  | UA5180_41A | 171,073,138 | 112,145,675   | 29,776                                                | 378                                       | 56                            | 322                       | 1.1                      |
|                             |           | Bar41_Nov   | UA5180_41B | 152,387,056 | 112,120,011   | 30,371                                                | 382                                       | 56                            | 326                       | 1.1                      |
|                             |           | Bar42_July  | UA5180_42A | 169,686,911 | 108,941,131   | 27,467                                                | 325                                       | 41                            | 284                       | 1.0                      |
|                             |           | Bar42_Nov   | UA5180_42B | 155,204,251 | 110,990,589   | 28,731                                                | 330                                       | 39                            | 291                       | 1.0                      |
|                             |           | Bar11       | UA5180_11  | 142,059,057 | 111,797,291   | 126,614                                               | 20                                        | 15                            | 5                         | 0.004                    |
|                             |           | Bar12       | UA5180_12  | 136,491,202 | 107,080,700   | 120,702                                               | 19                                        | 14                            | 5                         | 0.004                    |
|                             |           | PJX039_June | UA5180_39A | 296,737,001 | 268,882,310   | 698,966                                               | 93                                        | 80                            | 13                        | 0.002                    |
|                             |           | PJX039_May  | UA5180_39B | 115,052,998 | 103,300,322   | 276,173                                               | 115                                       | 72                            | 43                        | 0.016                    |
|                             |           | Bar3        | UA5180_3   | 58,218,887  | 53,466,704    | 157,658                                               | 85                                        | 71                            | 14                        | 0.009                    |

\*Merged reads are adaptor-trimmed and merged paired-end reads, without duplicates removed

\*\*Mapped (non-redundant) reads filtered to 20bp and map quality 20

\*\*\*Read overlap was calculated based on the number of shared reads between the *M. edwardsi* mtDNA and H6A1 mapped BAM files

\*\*\*\*Reads unique to human was calculated as the difference between the mapped human reads and overlapped reads



**Table S3. Proportion of genes covered in the 2X damage-masked and no-masked *Megaladapis edwardsi* data set**

**2X damage-masked**

| <b>% of sites at 2X</b> | <b># of genes called at x% of sites</b> | <b>% of genes called at x% of sites</b> |
|-------------------------|-----------------------------------------|-----------------------------------------|
| 0%                      | 2,763                                   | 12.84                                   |
| 0-9%                    | 4,071                                   | 18.92                                   |
| >10%                    | 17,448                                  | 81.08                                   |
| >15%                    | 16,568                                  | 76.99                                   |
| 10-19%                  | 2,337                                   | 10.86                                   |
| >20%                    | 15,111                                  | 70.22                                   |
| >25%                    | 12,847                                  | 59.7                                    |
| 20-29%                  | 5,190                                   | 24.12                                   |
| >30%                    | 9,921                                   | 46.1                                    |
| >35%                    | 6,824                                   | 31.71                                   |
| 30-39%                  | 5,733                                   | 26.64                                   |
| >40%                    | 4,188                                   | 19.46                                   |
| >45%                    | 2,206                                   | 10.25                                   |
| 40-49%                  | 3,079                                   | 14.31                                   |
| >50%                    | 1,109                                   | 5.15                                    |
| >55%                    | 465                                     | 2.16                                    |
| 50-59%                  | 957                                     | 4.45                                    |
| >60%                    | 152                                     | 0.71                                    |
| >65%                    | 40                                      | 0.19                                    |
| 60-69%                  | 144                                     | 0.67                                    |
| >70%                    | 8                                       | 0.04                                    |
| >75%                    | 2                                       | 0.01                                    |
| 70-79%                  | 8                                       | 0.04                                    |
| >80%                    | 0                                       | 0                                       |
| >85%                    | 0                                       | 0                                       |
| 80-89%                  | 0                                       | 0                                       |
| >90%                    | 0                                       | 0                                       |
| >95%                    | 0                                       | 0                                       |
| 90-99%                  | 0                                       | 0                                       |
| 100%                    | 0                                       | 0                                       |

## 2X not damage-masked

| <b>% of sites at 2X</b> | <b># of genes called at x% of sites</b> | <b>% of genes called at x% of sites</b> |
|-------------------------|-----------------------------------------|-----------------------------------------|
| 0%                      | 2,758                                   | 12.82                                   |
| 0-9%                    | 3,883                                   | 18.04                                   |
| >10%                    | 17,636                                  | 81.96                                   |
| >15%                    | 16,937                                  | 78.71                                   |
| 10-19%                  | 1,718                                   | 7.98                                    |
| >20%                    | 15,918                                  | 73.97                                   |
| >25%                    | 14,390                                  | 66.87                                   |
| 20-29%                  | 3,670                                   | 17.05                                   |
| >30%                    | 12,248                                  | 56.92                                   |
| >35%                    | 9,828                                   | 45.67                                   |
| 30-39%                  | 4,865                                   | 22.61                                   |
| >40%                    | 7,383                                   | 34.31                                   |
| >45%                    | 5,181                                   | 24.08                                   |
| 40-49%                  | 3,976                                   | 18.48                                   |
| >50%                    | 3,407                                   | 15.83                                   |
| >55%                    | 2,066                                   | 9.6                                     |
| 50-59%                  | 2,153                                   | 10.01                                   |
| >60%                    | 1,254                                   | 5.83                                    |
| >65%                    | 697                                     | 3.24                                    |
| 60-69%                  | 893                                     | 4.15                                    |
| >70%                    | 361                                     | 1.68                                    |
| >75%                    | 149                                     | 0.69                                    |
| 70-79%                  | 315                                     | 1.46                                    |
| >80%                    | 46                                      | 0.21                                    |
| >85%                    | 11                                      | 0.05                                    |
| 80-89%                  | 44                                      | 0.2                                     |
| >90%                    | 2                                       | 0.01                                    |
| >95%                    | 1                                       | 0.005                                   |
| 90-99%                  | 2                                       | 0.01                                    |
| 100%                    | 0                                       | 0                                       |

**Table S4. Full set of genes (n=53) in *M. edwardsi* with  $d_N/d_{S_{genome}} > 1.5$**

| Genes    | t     | N    | S    | dN     | dS       | dN.dS  | Nsites | Ssites | dN.dSg   | RefGene  | Full gene name                                                 | Protein function in <i>H. sapiens</i> (NCBI <sup>(11)</sup> )                                                     |
|----------|-------|------|------|--------|----------|--------|--------|--------|----------|----------|----------------------------------------------------------------|-------------------------------------------------------------------------------------------------------------------|
| uc001aky | 0.091 | 4.2  | 0    | 0.0401 | 0        | 999    | 104.3  | 33.7   | 1.564217 | CEP104   | Centrosomal protein 104                                        | Ciliogenesis and ciliary integrity                                                                                |
| uc001aoi | 0.099 | 15.6 | 0    | 0.0451 | 0        | 999    | 345.9  | 125.1  | 1.759256 | CAMTA1   | Calmodulin binding transcription activator 1                   | Transcription factor, tumor suppressor                                                                            |
| uc001cce | 0.137 | 5.2  | 3.2  | 0.0415 | 0.0548   | 0.7577 | 125.5  | 57.5   | 1.618828 | MTF1     | Metal regulatory transcription factor 1                        | Maintaining metal homeostasis                                                                                     |
| uc001cix | 0.121 | 6.3  | 2.2  | 0.0441 | 0.0326   | 1.3521 | 143.9  | 66.1   | 1.720249 | CDC20    | Cell division cycle 20                                         | Nuclear movement and chromosome separation                                                                        |
| uc001eoa | 0.132 | 8.5  | 3    | 0.0459 | 0.0397   | 1.1556 | 184.9  | 76.1   | 1.790463 | ITGA10   | Integrin subunit alpha 10                                      | Cell adhesion, cell surface signalling                                                                            |
| uc001giz | 0.139 | 6.9  | 1.5  | 0.0548 | 0.0269   | 2.0387 | 125    | 55     | 2.137633 | SLC9C2   | Solute carrier family 9 member C2                              | Not indicated                                                                                                     |
| uc001glq | 0.256 | 17.8 | 1.2  | 0.1101 | 0.0193   | 5.7069 | 161.2  | 60.8   | 4.29477  | RASAL2   | RAS protein-like activator 2                                   | Activator of small GTPases (Ras superfamily)                                                                      |
| uc001hly | 0.158 | 12.9 | 9.5  | 0.0392 | 0.0979   | 0.3999 | 328.6  | 97.4   | 1.52911  | EPRS     | Glutamyl-prolyl-tRNA synthetase                                | Enzymes that charge tRNAs                                                                                         |
| uc001htn | 0.098 | 12   | 1.6  | 0.0386 | 0.0154   | 2.5042 | 310.1  | 103.9  | 1.505705 | NUP133   | Nucleoporin 133                                                | Regulates flow of macromolecules between nucleus and cytoplasm                                                    |
| uc001jmw | 0.237 | 9.4  | 2.5  | 0.0846 | 0.063    | 1.3429 | 110.5  | 39.5   | 3.300069 | CTNNA3   | Catenin alpha 3                                                | Cell adhesion in muscle cells                                                                                     |
| uc001kjk | 0.12  | 15.1 | 5.9  | 0.04   | 0.0405   | 0.987  | 377.3  | 144.7  | 1.560316 | PLCE1    | Phospholipase C epsilon 1                                      | Catalyzes hydrolysis in cell differentiation, growth, gene expression                                             |
| uc001kqa | 0.131 | 4.4  | 2.3  | 0.0432 | 0.0445   | 0.9715 | 102    | 51     | 1.685141 | ENTPD7   | Ectonucleoside triphosphate diphosphohydrolase 7               | Hydrolyzes extracellular nucleoside triphosphate                                                                  |
| uc001phc | 0.248 | 10.1 | 2.8  | 0.0856 | 0.074    | 1.1578 | 117.5  | 38.5   | 3.339077 | MMP20    | Matrix metalloproteinase 20                                    | Breakdown of amelogenin, relating to enamel formation                                                             |
| uc001prc | 0.188 | 6.4  | 3.2  | 0.0596 | 0.0693   | 0.8601 | 106.7  | 46.3   | 2.324871 | CEP164   | Centrosomal protein 164                                        | Microtubule organization, DNA damage response, chromosome segregation                                             |
| uc001rfb | 0.199 | 6.6  | 6.3  | 0.048  | 0.111    | 0.4326 | 138.4  | 56.6   | 1.872379 | GYS2     | Glycogen synthase 2                                            | Catalyzes glycogen synthesis                                                                                      |
| uc001utj | 0.155 | 4.8  | 3.9  | 0.0395 | 0.0829   | 0.4761 | 120.6  | 47.4   | 1.540812 | HSPH1    | Heat shock protein family H (Hsp110) member 1                  | Inhibits aggregation of misfolded proteins                                                                        |
| uc001vbk | 0.171 | 5.7  | 3.9  | 0.045  | 0.093    | 0.4842 | 126.2  | 41.8   | 1.755356 | LRCH1    | Leucine rich repeats and calponin homology domain containing 1 | Polymorphisms potentially associated with osteoarthritis in knees                                                 |
| uc001vmk | 0.138 | 5.1  | 2.1  | 0.0432 | 0.0548   | 0.7894 | 118.1  | 37.9   | 1.685141 | DZIP1    | DAZ interacting zinc finger protein 1                          | Not indicated                                                                                                     |
| uc001wwf | 0.153 | 5.2  | 3.1  | 0.0462 | 0.0619   | 0.7474 | 112.5  | 49.5   | 1.802165 | MIS18BP1 | MIS18 binding protein 1                                        | Not indicated                                                                                                     |
| uc001ygr | 0.137 | 5    | 2.6  | 0.0421 | 0.0539   | 0.7814 | 119.7  | 48.3   | 1.642233 | EML1     | EMAP like 1                                                    | Echinoderm microtubule-associated protein-like, candidate for Usher syndrome type 1A gene (deafness, vision loss) |
| uc001yks | 0.154 | 14.7 | 10.1 | 0.0398 | 0.0874   | 0.456  | 369.9  | 116.1  | 1.552515 | DYNC1H1  | Dynein cytoplasmic 1 heavy chain 1                             | Intracellular motility                                                                                            |
| uc002bqc | 0.232 | 9    | 2.1  | 0.0811 | 0.064    | 1.2673 | 111.3  | 32.7   | 3.163541 | MAN2A2   | Mannosidase alpha class 2A member 2                            | Not indicated                                                                                                     |
| uc002esm | 0.095 | 5.5  | 0    | 0.0417 | 0        | 999    | 132.2  | 41.8   | 1.62663  | SLC9A5   | Solute carrier family 9 member A5                              | Not indicated                                                                                                     |
| uc002hfb | 0.177 | 8.6  | 4.2  | 0.0543 | 0.0719   | 0.7559 | 157.9  | 58.1   | 2.118129 | CPD      | Carboxypeptidase D                                             | Metalloproteinases                                                                                                |
| uc002ktw | 0.166 | 10.2 | 5.2  | 0.0478 | 0.0808   | 0.5911 | 214.3  | 64.7   | 1.864578 | RBBP8    | RB binding protein 8, endonuclease                             | Nuclear protein, potential tumor suppressor                                                                       |
| uc002lly | 0.149 | 7.6  | 3.1  | 0.0436 | 0.0741   | 0.5888 | 174.3  | 41.7   | 1.700745 | TSHZ1    | Teashirt zinc finger homeobox 1                                | Encodes colon cancer antigen; regulation of developmental processes                                               |
| uc002oqb | 0.145 | 7.4  | 2    | 0.0509 | 0.0413   | 1.2338 | 145.9  | 49.1   | 1.985502 | HNRNPUL1 | Heterogeneous nuclear ribonucleoprotein U like 1               | Binds to adenovirus early-1B-55kDa oncoprotein; nucleocytoplasmic RNA transport                                   |
| uc002qzh | 0.17  | 7.2  | 6.7  | 0.042  | 0.0902   | 0.4662 | 171.2  | 74.8   | 1.638332 | ASAP2    | AirGAP with SH3 domain, ankyrin repeat and PH domain 2         | Multi-domain protein                                                                                              |
| uc002tdx | 0.278 | 9.8  | 3.6  | 0.0912 | 0.0975   | 0.9353 | 107.2  | 36.8   | 3.557521 | SULT1C2  | Sulfotransferase family 1C member 2                            | Catalyzes conjugation of drugs, neurotransmitters, xenobiotic compounds                                           |
| uc002top | 0.112 | 4.1  | 1.1  | 0.0406 | 0.0288   | 1.4094 | 101.3  | 39.7   | 1.583721 | MYO7B    | Myosin VIIb                                                    | Brusher border microvilli in epithelial cells of intestines and kidneys                                           |
| uc002wmg | 0.093 | 6.2  | 0    | 0.0439 | 0        | 999    | 141.7  | 59.3   | 1.712447 | CHGB     | Chromogranin B                                                 | Encodes protein abundant in endocrine cells and neurons                                                           |
| uc002xya | 0.125 | 5.4  | 0.9  | 0.0461 | 0.0268   | 1.7186 | 117.6  | 35.4   | 1.798264 | TFAP2C   | Transcription factor AP-2 gamma                                | Activation of developmental genes associated with eyes, face, limbs, neural tube                                  |
| uc002yvg | 0.237 | 28.6 | 18.8 | 0.0696 | 0.0993   | 0.7013 | 410.7  | 189.3  | 2.71495  | DOPEY2   | Dopey family member 2                                          | Not indicated                                                                                                     |
| uc003bkb | 0.265 | 11.9 | 4.5  | 0.0872 | 0.0912   | 0.9566 | 136.8  | 49.2   | 3.401489 | TUBGCP6  | Tubulin gamma complex associated protein 6                     | Microtubule nucleation at the centrosome                                                                          |
| uc003bvt | 0.186 | 8.9  | 0    | 0.0857 | 1.00E-04 | 999    | 104.4  | 39.6   | 3.342977 | ATP2B2   | ATPase plasma membrane Ca2+ transporting 2                     | Role in intracellular calcium homeostasis                                                                         |
| uc003cvt | 0.177 | 6.3  | 4.5  | 0.0466 | 0.0941   | 0.4947 | 135.3  | 47.7   | 1.817768 | IMPDH2   | Inosine monophosphate dehydrogenase 2                          | Maintaining cellular pools for DNA and RNA synthesis                                                              |
| uc003cwq | 0.172 | 6.3  | 5.5  | 0.0455 | 0.0814   | 0.5586 | 138.9  | 68.1   | 1.77486  | USP4     | Ubiquitin specific peptidase 4                                 | Maintaining endoplasmic reticulum                                                                                 |

|          |       |      |     |        |          |          |       |       |          |          |                                                   |                                                                              |
|----------|-------|------|-----|--------|----------|----------|-------|-------|----------|----------|---------------------------------------------------|------------------------------------------------------------------------------|
| uc003cxh | 0.312 | 10.2 | 5.7 | 0.0962 | 0.1217   | 0.7906   | 106.5 | 46.5  | 3.75256  | RNF123   | Ring finger protein 123                           | Involved in protein-protein, protein-DNA interactions                        |
| uc003iaa | 0.129 | 6.7  | 2.7 | 0.04   | 0.0519   | 0.7711   | 166.9 | 52.1  | 1.560316 | C4orf21  | Chromosome 4 open reading frame 21                | Not indicated                                                                |
| uc003iod | 0.124 | 6.1  | 1   | 0.049  | 0.0211   | 2.3239   | 125.3 | 48.7  | 1.911387 | FGA      | Fibrinogen alpha chain                            | Involved in coagulation                                                      |
| uc003jmt | 0.176 | 7.8  | 2   | 0.0725 | 0.0338   | 2.1491   | 107.9 | 60.1  | 2.828073 | GHR      | Growth hormone receptor                           | Transmembrane receptor for growth hormone                                    |
| uc003psu | 0.159 | 9.8  | 3   | 0.0491 | 0.0701   | 0.7004   | 199.6 | 43.4  | 1.915288 | SESN1    | Sestrin 1                                         | Cellular response to DNA damage, oxidative stress                            |
| uc003tcv | 0.274 | 10.5 | 3.7 | 0.0926 | 0.0876   | 1.0576   | 113.3 | 42.7  | 3.612132 | AVL9     | AVL 9 cell migration associated                   | Not indicated                                                                |
| uc003wqi | 0.116 | 6.4  | 0   | 0.0484 | 0        | 999      | 132.2 | 32.8  | 1.887983 | MCPH1    | Microcephalin 1                                   | DNA damage response protein                                                  |
| uc004bgm | 0.11  | 4.2  | 1   | 0.0402 | 0.0268   | 1.503    | 105.4 | 38.6  | 1.568118 | ZFP37    | ZFP 37 zinc finger protein                        | Transcription factor for large family of zinc finger proteins                |
| uc004cbq | 0.158 | 11   | 2.4 | 0.0607 | 0.0329   | 1.8451   | 180.9 | 74.1  | 2.36778  | DDX31    | Deadbox helicase 31                               | Cellular processes, embryogenesis, spermatogenesis, cellular growth/division |
| uc009xdc | 0.142 | 13.6 | 0   | 0.066  | 1.00E-04 | 999      | 206.3 | 81.7  | 2.574522 | DTL      | Denticleless E3 ubiquitin protein ligase homolog  | Not indicated                                                                |
| uc009xug | 0.128 | 7.3  | 0   | 0.0555 | 1.00E-04 | 999      | 131.5 | 39.5  | 2.164939 | CEP55    | Centrosomal protein 55                            | Not indicated                                                                |
| uc011dur | 0.107 | 18.7 | 0   | 0.0482 | 2.00E-04 | 234.3107 | 387.2 | 134.8 | 1.880181 | UBR2     | Ubiquitin protein ligase E3 component n-recogin 2 | Proteasome-mediated degradation; proteolytic pathway                         |
| uc011lrv | 0.132 | 11.8 | 2.9 | 0.0497 | 0.0305   | 1.6287   | 237   | 96    | 1.938693 | TJP2     | Tight junction protein 2                          | Junction barrier in epithelial and endothelial cells                         |
| uc021qzu | 0.147 | 6.2  | 1.2 | 0.0572 | 0.028    | 2.0466   | 107.7 | 42.3  | 2.231252 | C12orf56 | Chromosome 12 open reading frame 56               | Not indicated                                                                |
| uc021ulp | 0.265 | 10.2 | 3.6 | 0.0845 | 0.1015   | 0.8328   | 120.3 | 35.7  | 3.296168 | ZNF516   | Zinc finger protein 516                           | Cell proliferation, differentiation, apoptosis                               |
| uc021vwx | 0.198 | 8.3  | 6.7 | 0.0522 | 0.0984   | 0.5304   | 159.9 | 68.1  | 2.036213 | PLCD4    | Phospholipase C delta 4                           | Cellular processes, including hydrolysis                                     |

“Genes” are the UCSC gene names

"t" is the number of nucleotide substitutions per codon

"N" is the number of non-synonymous sites

"S" is the number of synonymous sites

"dN" is the number of non-synonymous substitutions per non-synonymous site

"dS" is the number of synonymous substitutions per synonymous site

"dN.dS" is the ratio of non-synonymous to synonymous sites

"Nsites" is the genome-wide rate of non-synonymous substitutions across all genes

"Ssites" is the genome-wide rate of synonymous substitutions across all genes

"dN.dSg" is the genome-wide ratio of non-synonymous to synonymous sites across all genes

“RefGene” is the gene name

“Full gene name” is the complete name of the gene

“Protein function in *H. sapiens* (NCBI\*)” is the function of the protein in *Homo sapiens* listed in NCBI

\*NCBI reference: Gene [Internet]. Bethesda (MD): National Library of Medicine (US), National Center for Biotechnology Information; 2004 – [cited 2021-01-20]. Available from: <https://www.ncbi.nlm.nih.gov/gene/>



|    |       |        |         |        |            |            |            |            |          |          |         |         |         |        |          |                     |                     |                     |
|----|-------|--------|---------|--------|------------|------------|------------|------------|----------|----------|---------|---------|---------|--------|----------|---------------------|---------------------|---------------------|
| 14 | 2156  | 15482  | 199111  | 2142   | 1978629    | 0.00020329 | 0.00138422 | 0.095846   | 1        | chomf1   | dm3no2  | proCaf1 | tau1    | panoA2 | mhmA1    | 1                   | Hydrolytic activity |                     |
| 15 | 2043  | 15603  | 590909  | 808    | 497285     | 0.00051539 | 0.00134488 | 0.170521   | 3        | chomf1   | dm3no2  | proCaf1 | tubB1   | slm1   | slmM1    | 0.773380            | Hydrolytic activity |                     |
| 4  | 1033  | 15683  | 237800  | 1029   | 267807     | 0.00045187 | 0.00051487 | 0.94008    | chomf1   | dm3no2   | proCaf1 | tau1    | panoA2  | mhmA1  | 0.843617 | Hydrolytic activity |                     |                     |
| 6  | 1348  | 13884  | 207760  | 1242   | 262021     | 0.00060356 | 0.00076444 | 0.77774    | 0.71523  | chomf1   | dm3no2  | proCaf1 | tau1    | panoA2 | vcfA2    | 0.712430            | Hydrolytic activity |                     |
| 10 | 1618  | 15618  | 126459  | 1470   | 262021     | 0.00093889 | 0.00073438 | 0.81551    | 0.761718 | chomf1   | dm3no2  | proCaf1 | tau1    | panoA2 | vcfA2    | 0.786317            | Hydrolytic activity |                     |
| 0  | 391   | 16831  | 160326  | 391    | 159845     | 0.00014411 | 0          | 0.18466    | chomf1   | dm3no2   | proCaf1 | tau1    | panoA2  | vcfA2  | 0.812836 | Hydrolytic activity |                     |                     |
| 0  | 754   | 16831  | 450076  | 754    | 160326     | 0.00015813 | 0.00050729 | 0.62823    | 0.638433 | chomf1   | dm3no2  | proCaf1 | tau1    | panoA2 | vcfA2    | 0.828157            | Hydrolytic activity |                     |
| 0  | 798   | 16831  | 554743  | 793    | 158473     | 0.00014622 | 0.00126804 | 0.90048    | 1        | chomf1   | dm3no2  | proCaf1 | tau1    | panoA2 | vcfA2    | 0.831704            | Hydrolytic activity |                     |
| 13 | 2133  | 17191  | 512363  | 13     | 21333      | 0.00015091 | 0          | 0          | 0        | chomf1   | dm3no2  | proCaf1 | tau1    | panoA2 | vcfA2    | 0.840876            | Hydrolytic activity |                     |
| 6  | 976   | 18973  | 490239  | 970    | 496266     | 0.00021849 | 0.00020188 | 0.89373    | 0.80565  | chomf1   | dm3no2  | proCaf1 | tau1    | panoA2 | vcfA2    | 0.850027            | Hydrolytic activity |                     |
| 2  | 379   | 20945  | 281229  | 377    | 281408     | 0.00013794 | 0.00010209 | 0.79387    | 1        | chomf1   | dm3no2  | proCaf1 | tau1    | panoA2 | vcfA2    | 0.851704            | Hydrolytic activity |                     |
| 2  | 1581  | 19629  | 196299  | 158    | 184443     | 0.00014423 | 0.00015513 | 0.24109    | 0.211373 | chomf1   | dm3no2  | proCaf1 | tau1    | panoA2 | vcfA2    | 0.852700            | Hydrolytic activity |                     |
| 5  | 572   | 21340  | 350763  | 567    | 348621     | 0.00012979 | 0.00124223 | 0.13443    | 0.493928 | chomf1   | dm3no2  | proCaf1 | tau1    | panoA2 | vcfA2    | 0.843945            | Hydrolytic activity |                     |
| 0  | 1020  | 18170  | 181700  | 1020   | 181700     | 0.00013616 | 0.00015666 | 0.53923    | 0.53923  | chomf1   | dm3no2  | proCaf1 | tau1    | panoA2 | vcfA2    | 0.836008            | Hydrolytic activity |                     |
| 3  | 135   | 20420  | 344938  | 132    | 344938     | 0.00013616 | 0.00011965 | 0.148319   | 0.079375 | chomf1   | dm3no2  | proCaf1 | tau1    | panoA2 | vcfA2    | 0.870170            | Hydrolytic activity |                     |
| 10 | 952   | 20420  | 539450  | 927    | 539450     | 0.00013616 | 0.00011965 | 0.148319   | 0.079375 | chomf1   | dm3no2  | proCaf1 | tau1    | panoA2 | vcfA2    | 0.870170            | Hydrolytic activity |                     |
| 0  | 305   | 21242  | 321845  | 305    | 321845     | 0.00013616 | 0.00011965 | 0.148319   | 0.079375 | chomf1   | dm3no2  | proCaf1 | tau1    | panoA2 | vcfA2    | 0.870170            | Hydrolytic activity |                     |
| 3  | 645   | 22118  | 332158  | 642    | 332158     | 0.00013616 | 0.00011965 | 0.148319   | 0.079375 | chomf1   | dm3no2  | proCaf1 | tau1    | panoA2 | vcfA2    | 0.870170            | Hydrolytic activity |                     |
| 0  | 884   | 20420  | 526407  | 877    | 526407     | 0.00013616 | 0.00011965 | 0.148319   | 0.079375 | chomf1   | dm3no2  | proCaf1 | tau1    | panoA2 | vcfA2    | 0.870170            | Hydrolytic activity |                     |
| 1  | 56    | 27108  | 388378  | 55     | 385758     | 0.00013616 | 0.00011965 | 0.148319   | 0.079375 | chomf1   | dm3no2  | proCaf1 | tau1    | panoA2 | vcfA2    | 0.870170            | Hydrolytic activity |                     |
| 3  | 1574  | 235509 | 574     | 239765 | 1          | 239765     | 0.00013616 | 0.00011965 | 0.148319 | 0.079375 | chomf1  | dm3no2  | proCaf1 | tau1   | panoA2   | vcfA2               | 0.870170            | Hydrolytic activity |
| 3  | 318   | 17950  | 286458  | 315    | 279338     | 0.00013616 | 0.00011965 | 0.148319   | 0.079375 | chomf1   | dm3no2  | proCaf1 | tau1    | panoA2 | vcfA2    | 0.870170            | Hydrolytic activity |                     |
| 3  | 723   | 39022  | 543788  | 720    | 537846     | 0.00013616 | 0.00011965 | 0.148319   | 0.079375 | chomf1   | dm3no2  | proCaf1 | tau1    | panoA2 | vcfA2    | 0.870170            | Hydrolytic activity |                     |
| 2  | 288   | 28200  | 390280  | 286    | 384868     | 0.00013616 | 0.00011965 | 0.148319   | 0.079375 | chomf1   | dm3no2  | proCaf1 | tau1    | panoA2 | vcfA2    | 0.870170            | Hydrolytic activity |                     |
| 1  | 303   | 43350  | 590452  | 302    | 590452     | 0.00013616 | 0.00011965 | 0.148319   | 0.079375 | chomf1   | dm3no2  | proCaf1 | tau1    | panoA2 | vcfA2    | 0.870170            | Hydrolytic activity |                     |
| 2  | 305   | 13905  | 442760  | 304    | 470387     | 0.00013616 | 0.00011965 | 0.148319   | 0.079375 | chomf1   | dm3no2  | proCaf1 | tau1    | panoA2 | vcfA2    | 0.870170            | Hydrolytic activity |                     |
| 0  | 64    | 30880  | 444820  | 64     | 444820     | 0.00013616 | 0.00011965 | 0.148319   | 0.079375 | chomf1   | dm3no2  | proCaf1 | tau1    | panoA2 | vcfA2    | 0.870170            | Hydrolytic activity |                     |
| 2  | 115   | 21066  | 304951  | 113    | 206685     | 0.00013616 | 0.00011965 | 0.148319   | 0.079375 | chomf1   | dm3no2  | proCaf1 | tau1    | panoA2 | vcfA2    | 0.870170            | Hydrolytic activity |                     |
| 4  | 483   | 29337  | 450473  | 479    | 479336     | 0.00013616 | 0.00011965 | 0.148319   | 0.079375 | chomf1   | dm3no2  | proCaf1 | tau1    | panoA2 | vcfA2    | 0.870170            | Hydrolytic activity |                     |
| 1  | 488   | 28182  | 420286  | 487    | 420286     | 0.00013616 | 0.00011965 | 0.148319   | 0.079375 | chomf1   | dm3no2  | proCaf1 | tau1    | panoA2 | vcfA2    | 0.870170            | Hydrolytic activity |                     |
| 13 | 38    | 29490  | 321946  | 38     | 321946     | 0.00013616 | 0.00011965 | 0.148319   | 0.079375 | chomf1   | dm3no2  | proCaf1 | tau1    | panoA2 | vcfA2    | 0.870170            | Hydrolytic activity |                     |
| 1  | 385   | 48704  | 67308   | 384    | 48704      | 0.00013616 | 0.00011965 | 0.148319   | 0.079375 | chomf1   | dm3no2  | proCaf1 | tau1    | panoA2 | vcfA2    | 0.870170            | Hydrolytic activity |                     |
| 4  | 1709  | 590909 | 808     | 497285 | 1          | 497285     | 0.00013616 | 0.00011965 | 0.148319 | 0.079375 | chomf1  | dm3no2  | proCaf1 | tau1   | panoA2   | vcfA2               | 0.870170            | Hydrolytic activity |
| 5  | 441   | 38614  | 526974  | 436    | 526974     | 0.00013616 | 0.00011965 | 0.148319   | 0.079375 | chomf1   | dm3no2  | proCaf1 | tau1    | panoA2 | vcfA2    | 0.870170            | Hydrolytic activity |                     |
| 2  | 554   | 28108  | 420346  | 552    | 420346     | 0.00013616 | 0.00011965 | 0.148319   | 0.079375 | chomf1   | dm3no2  | proCaf1 | tau1    | panoA2 | vcfA2    | 0.870170            | Hydrolytic activity |                     |
| 2  | 1578  | 21789  | 326812  | 1574   | 326812     | 0.00013616 | 0.00011965 | 0.148319   | 0.079375 | chomf1   | dm3no2  | proCaf1 | tau1    | panoA2 | vcfA2    | 0.870170            | Hydrolytic activity |                     |
| 1  | 201   | 28429  | 378024  | 200    | 374195     | 0.00013616 | 0.00011965 | 0.148319   | 0.079375 | chomf1   | dm3no2  | proCaf1 | tau1    | panoA2 | vcfA2    | 0.870170            | Hydrolytic activity |                     |
| 2  | 202   | 42962  | 610505  | 202    | 610505     | 0.00013616 | 0.00011965 | 0.148319   | 0.079375 | chomf1   | dm3no2  | proCaf1 | tau1    | panoA2 | vcfA2    | 0.870170            | Hydrolytic activity |                     |
| 0  | 831   | 28429  | 413932  | 831    | 413932     | 0.00013616 | 0.00011965 | 0.148319   | 0.079375 | chomf1   | dm3no2  | proCaf1 | tau1    | panoA2 | vcfA2    | 0.870170            | Hydrolytic activity |                     |
| 0  | 732   | 28429  | 413932  | 732    | 413932     | 0.00013616 | 0.00011965 | 0.148319   | 0.079375 | chomf1   | dm3no2  | proCaf1 | tau1    | panoA2 | vcfA2    | 0.870170            | Hydrolytic activity |                     |
| 0  | 343   | 26164  | 364781  | 343    | 363311     | 0.00013616 | 0.00011965 | 0.148319   | 0.079375 | chomf1   | dm3no2  | proCaf1 | tau1    | panoA2 | vcfA2    | 0.870170            | Hydrolytic activity |                     |
| 5  | 1306  | 34324  | 470038  | 1201   | 467323     | 0.00013616 | 0.00011965 | 0.148319   | 0.079375 | chomf1   | dm3no2  | proCaf1 | tau1    | panoA2 | vcfA2    | 0.870170            | Hydrolytic activity |                     |
| 4  | 45327 | 656270 | 889     | 656270 | 0.00013616 | 0.00011965 | 0.148319   | 0.079375   | chomf1   | dm3no2   | proCaf1 | tau1    | panoA2  | vcfA2  | 0.870170 | Hydrolytic activity |                     |                     |
| 5  | 859   | 29985  | 440235  | 854    | 447081     | 0.00013616 | 0.00011965 | 0.148319   | 0.079375 | chomf1   | dm3no2  | proCaf1 | tau1    | panoA2 | vcfA2    | 0.870170            | Hydrolytic activity |                     |
| 3  | 1793  | 24588  | 361625  | 1789   | 361625     | 0.00013616 | 0.00011965 | 0.148319   | 0.079375 | chomf1   | dm3no2  | proCaf1 | tau1    | panoA2 | vcfA2    | 0.870170            | Hydrolytic activity |                     |
| 8  | 870   | 39498  | 531274  | 862    | 529678     | 0.00013616 | 0.00011965 | 0.148319   | 0.079375 | chomf1   | dm3no2  | proCaf1 | tau1    | panoA2 | vcfA2    | 0.870170            | Hydrolytic activity |                     |
| 4  | 58483 | 862065 | 1163409 | 58483  | 862065     | 0.00013616 | 0.00011965 | 0.148319   | 0.079375 | chomf1   | dm3no2  | proCaf1 | tau1    | panoA2 | vcfA2    | 0.870170            | Hydrolytic activity |                     |
| 3  | 781   | 22275  | 354022  | 778    | 351225     | 0.00013616 | 0.00011965 | 0.148319   | 0.079375 | chomf1   | dm3no2  | proCaf1 | tau1    | panoA2 | vcfA2    | 0.870170            | Hydrolytic activity |                     |
| 4  | 766   | 32436  | 465139  | 762    | 460733     | 0.00013616 | 0.00011965 | 0.148319   | 0.079375 | chomf1   | dm3no2  | proCaf1 | tau1    | panoA2 | vcfA2    | 0.870170            | Hydrolytic activity |                     |
| 4  | 2936  | 42036  | 621820  | 2932   | 621820     | 0.00013616 | 0.00011965 | 0.148319   | 0.079375 | chomf1   | dm3no2  | proCaf1 | tau1    | panoA2 | vcfA2    | 0.870170            | Hydrolytic activity |                     |
| 9  | 870   | 31561  | 459478  | 861    | 456222     | 0.00013616 | 0.00011965 | 0.148319   | 0.079375 | chomf1   | dm3no2  | proCaf1 | tau1    | panoA2 | vcfA2    | 0.870170            | Hydrolytic activity |                     |
| 4  | 547   | 490079 | 670731  | 543    | 497373     | 0.00013616 | 0.00011965 | 0.148319   | 0.079375 | chomf1   | dm3no2  | proCaf1 | tau1    | panoA2 | vcfA2    | 0.870170            | Hydrolytic activity |                     |
| 1  | 539   | 21386  | 351708  | 534    | 348702     | 0.00013616 | 0.00011965 | 0.148319   | 0.079375 | chomf1   | dm3no2  | proCaf1 | tau1    | panoA2 | vcfA2    | 0.870170            | Hydrolytic activity |                     |
| 1  | 1032  | 13919  | 193924  | 1031   | 137822     | 0.00013616 | 0.00011965 | 0.148319   | 0.079375 | chomf1   | dm3no2  | proCaf1 | tau1    | panoA2 | vcfA2    | 0.870170            | Hydrolytic activity |                     |
| 26 | 2589  | 28429  | 268621  | 2589   | 268621     | 0.00013616 | 0.00011965 | 0.148319   | 0.079375 | chomf1   | dm3no2  | proCaf1 | tau1    | panoA2 | vcfA2    | 0.870170            | Hydrolytic activity |                     |
| 19 | 1905  | 28429  | 268621  | 1905   | 268621     | 0.00013616 | 0.00011965 | 0.148319   | 0.079375 | chomf1   | dm3no2  | proCaf1 | tau1    | panoA2 | vcfA2    | 0.870170            | Hydrolytic activity |                     |
| 13 | 1477  | 18369  | 274513  | 1464   | 270574     | 0.00013616 | 0.00011965 | 0.148319   | 0.079375 | chomf1   | dm3no2  | proCaf1 | tau1    | panoA2 | vcfA2    | 0.870170            | Hydrolytic activity |                     |
| 1  | 1481  | 17824  | 274513  | 1479   | 270574     | 0.00013616 | 0.00011965 | 0.148319   | 0.079375 | chomf1   | dm3no2  | proCaf1 | tau1    | panoA2 | vcfA2    | 0.870170            | Hydrolytic activity |                     |
| 10 | 1038  | 14750  | 217669  | 1038   | 217669     | 0.00013616 | 0.00011965 | 0.148319   | 0.079375 | chomf1   | dm3no2  | proCaf1 | tau1    | panoA2 | vcfA2    | 0.870170            | Hydrolytic activity |                     |
| 5  | 572   | 21340  | 350763  | 567    | 348621     | 0.00013616 | 0.00011965 | 0.148319   | 0.079375 | chomf1   | dm3no2  | proCaf1 | tau1    | panoA2 | vcfA2    | 0.870170            | Hydrolytic activity |                     |
| 1  | 17458 | 24588  | 361625  | 17458  | 361625     | 0.00013616 | 0.00011965 | 0.148319   | 0.079375 | chomf1   | dm3no2  | proCaf1 | tau1    | panoA2 | vcfA2    | 0.870170            | Hydrolytic activity |                     |
| 7  | 611   | 19788  | 281085  | 604    | 281085     | 0.00013616 | 0.00011965 | 0.148319   | 0.079375 | chomf1   | dm3no2  | proCaf1 | tau1    | panoA2 | vcfA2    | 0.870170            | Hydrolytic activity |                     |
| 8  | 109   | 21340  | 350763  | 109    | 350763     | 0.00013616 | 0.00011965 | 0.148319   | 0.079375 | chomf1   | dm3no2  | proCaf1 | tau1    | panoA2 | vcfA2    | 0.870170            | Hydrolytic activity |                     |
| 22 | 28429 | 29868  | 406209  | 28429  | 406209     | 0.00013616 | 0.00011965 | 0.148319   | 0.079375 | chomf1   | dm3no2  | proCaf1 | tau1    | panoA2 | vcfA2    | 0.870170            | Hydrolytic activity |                     |
| 1  | 599   | 20065  | 284290  | 598    | 284290     | 0.00013616 | 0.00011965 | 0.148319   | 0.079375 | chomf1   | dm3no2  | proCaf1 | tau1    | panoA2 | vcfA2    | 0.870170            | Hydrolytic activity |                     |
| 8  | 2317  | 9736   | 164749  | 2308   |            |            |            |            |          |          |         |         |         |        |          |                     |                     |                     |







|     |       |        |         |        |        |            |            |             |            |            |         |         |      |        |        |           |                    |                    |
|-----|-------|--------|---------|--------|--------|------------|------------|-------------|------------|------------|---------|---------|------|--------|--------|-----------|--------------------|--------------------|
| 26  | 2343  | 20555  | 286513  | 2217   | 283938 | 0.00079533 | 0.00120002 | 1.542518    | 0.055132   | leaM1      | prcCat1 | ent1    | tar1 | panAa2 | mMm1   | 0.0512385 | Hydrolyse activity |                    |
| 12  | 2214  | 20559  | 286513  | 2217   | 283938 | 0.00079533 | 0.00120002 | 1.542518    | 0.055132   | leaM1      | prcCat1 | ent1    | tar1 | panAa2 | mMm1   | 0.0512385 | Hydrolyse activity |                    |
| 12  | 1121  | 17407  | 371020  | 1309   | 368652 | 0.00031566 | 0.00047225 | 1.326211    | 0.313746   | leaM1      | prcCat1 | ent1    | tar1 | panAa2 | mMm1   | 0.0314483 | Hydrolyse activity |                    |
| 12  | 1445  | 16046  | 292326  | 1453   | 292020 | 0.00049468 | 0.00044838 | 1.310824    | 0.182234   | leaM1      | prcCat1 | ent1    | tar1 | panAa2 | mMm1   | 0.0317488 | Hydrolyse activity |                    |
| 12  | 1558  | 17566  | 315667  | 1567   | 315002 | 0.00012765 | 0.00012765 | 1.188422    | 0.0202028  | leaM1      | prcCat1 | ent1    | tar1 | panAa2 | mMm1   | 0.0319466 | Hydrolyse activity |                    |
| 4   | 470   | 17316  | 224620  | 466    | 223254 | 0.00020213 | 0.00020213 | 1.39353     | 0.380964   | leaM1      | prcCat1 | ent1    | tar1 | panAa2 | mMm1   | 0.0317905 | Hydrolyse activity |                    |
| 4   | 1743  | 18474  | 205641  | 1747   | 204944 | 0.00001729 | 0.00001729 | 1.21051     | 0.428243   | leaM1      | prcCat1 | ent1    | tar1 | panAa2 | mMm1   | 0.0312577 | Hydrolyse activity |                    |
| 7   | 1390  | 20725  | 321940  | 1383   | 320824 | 0.00011488 | 0.00011488 | 1.061337    | 0.73514    | leaM1      | prcCat1 | ent1    | tar1 | panAa2 | mMm1   | 0.0319466 | Hydrolyse activity |                    |
| 7   | 1516  | 16174  | 235828  | 1510   | 235102 | 0.00003387 | 0.00003387 | 1.049414    | 0.394141   | leaM1      | prcCat1 | ent1    | tar1 | panAa2 | mMm1   | 0.0319466 | Hydrolyse activity |                    |
| 20  | 2055  | 20220  | 270888  | 2055   | 271468 | 0.00001708 | 0.00001708 | 1.0054053   | 0.18522    | leaM1      | prcCat1 | ent1    | tar1 | panAa2 | mMm1   | 0.0319466 | Hydrolyse activity |                    |
| 7   | 1114  | 11647  | 180524  | 1107   | 181897 | 0.00006292 | 0.00006292 | 0.9992033   | 0.999203   | leaM1      | prcCat1 | ent1    | tar1 | panAa2 | mMm1   | 0.0319466 | Hydrolyse activity |                    |
| 7   | 1282  | 12586  | 422445  | 1281   | 422066 | 0.00001935 | 0.00001935 | 1.449714    | 0.139595   | leaM1      | prcCat1 | ent1    | tar1 | panAa2 | mMm1   | 0.0316370 | Hydrolyse activity |                    |
| 7   | 542   | 20489  | 300545  | 535    | 300381 | 0.00017848 | 0.00017848 | 0.00032744  | 1.25454    | 1.2544     | leaM1   | prcCat1 | ent1 | tar1   | panAa2 | mMm1      | 0.0317488          | Hydrolyse activity |
| 7   | 1840  | 18880  | 339581  | 1840   | 339181 | 0.00003878 | 0.00003878 | 0.00000000  | 0.00000000 | leaM1      | prcCat1 | ent1    | tar1 | panAa2 | mMm1   | 0.0319466 | Hydrolyse activity |                    |
| 8   | 1834  | 18417  | 229720  | 1833   | 229422 | 0.00007328 | 0.00007328 | 0.00058776  | 0.77203    | 0.67328    | leaM1   | prcCat1 | ent1 | tar1   | panAa2 | mMm1      | 0.0319466          | Hydrolyse activity |
| 3   | 362   | 10782  | 1794009 | 359    | 178737 | 0.00012872 | 0.00012872 | 0.00078242  | 1.30706    | 0.92076    | leaM1   | prcCat1 | ent1 | tar1   | panAa2 | mMm1      | 0.0307354          | Hydrolyse activity |
| 3   | 1840  | 20489  | 300545  | 1840   | 300149 | 0.00001741 | 0.00001741 | 0.00017848  | 1.18514    | 1.75527    | leaM1   | prcCat1 | ent1 | tar1   | panAa2 | mMm1      | 0.0319466          | Hydrolyse activity |
| 33  | 3500  | 39880  | 395543  | 3507   | 395543 | 0.00009394 | 0.00009394 | 0.00012872  | 1.47915    | 0.03273    | leaM1   | prcCat1 | ent1 | tar1   | panAa2 | mMm1      | 0.0319466          | Hydrolyse activity |
| 33  | 14603 | 15214  | 205102  | 14603  | 205102 | 0.00001038 | 0.00001038 | 0.00044472  | 1.482026   | 0.00000000 | leaM1   | prcCat1 | ent1 | tar1   | panAa2 | mMm1      | 0.0319466          | Hydrolyse activity |
| 22  | 2214  | 14177  | 215379  | 2192   | 214358 | 0.00021730 | 0.00021730 | 0.00155189  | 1.51988    | 0.03941    | leaM1   | prcCat1 | ent1 | tar1   | panAa2 | mMm1      | 0.0319466          | Hydrolyse activity |
| 20  | 2055  | 15688  | 1981    | 200252 | 1981   | 0.00009266 | 0.00009266 | 0.00017157  | 1.70512    | 0.02581    | leaM1   | prcCat1 | ent1 | tar1   | panAa2 | mMm1      | 0.0319466          | Hydrolyse activity |
| 4   | 777   | 14477  | 180550  | 773    | 180525 | 0.00042129 | 0.00042129 | 0.00148523  | 0.568617   | 1.5        | leaM1   | prcCat1 | ent1 | tar1   | panAa2 | mMm1      | 0.0319466          | Hydrolyse activity |
| 2   | 581   | 22735  | 334009  | 579    | 333794 | 0.00012029 | 0.00012029 | 0.000125279 | 1.454204   | 0.45339    | leaM1   | prcCat1 | ent1 | tar1   | panAa2 | mMm1      | 0.0319466          | Hydrolyse activity |
| 1   | 212   | 22635  | 366709  | 208    | 364124 | 0.00012029 | 0.00012029 | 0.000125279 | 1.454204   | 0.45339    | leaM1   | prcCat1 | ent1 | tar1   | panAa2 | mMm1      | 0.0319466          | Hydrolyse activity |
| 1   | 199   | 26682  | 376612  | 198    | 376408 | 0.00012029 | 0.00012029 | 0.000125279 | 1.454204   | 0.45339    | leaM1   | prcCat1 | ent1 | tar1   | panAa2 | mMm1      | 0.0319466          | Hydrolyse activity |
| 1   | 55    | 25028  | 350828  | 55     | 350432 | 0.00012029 | 0.00012029 | 0.000125279 | 1.454204   | 0.45339    | leaM1   | prcCat1 | ent1 | tar1   | panAa2 | mMm1      | 0.0319466          | Hydrolyse activity |
| 5   | 649   | 21461  | 317024  | 644    | 314889 | 0.00021730 | 0.00021730 | 0.00022291  | 1.18077    | 0.63356    | leaM1   | prcCat1 | ent1 | tar1   | panAa2 | mMm1      | 0.0319466          | Hydrolyse activity |
| 1   | 1975  | 20288  | 292528  | 1975   | 292528 | 0.00001742 | 0.00001742 | 0.000886    | 1.20311    | 0.68437    | leaM1   | prcCat1 | ent1 | tar1   | panAa2 | mMm1      | 0.0319466          | Hydrolyse activity |
| 4   | 212   | 20559  | 366709  | 208    | 364124 | 0.00012029 | 0.00012029 | 0.000125279 | 1.454204   | 0.45339    | leaM1   | prcCat1 | ent1 | tar1   | panAa2 | mMm1      | 0.0319466          | Hydrolyse activity |
| 13  | 1321  | 18792  | 291132  | 1308   | 289240 | 0.00041763 | 0.00041763 | 0.000969134 | 1.24507    | 0.12273    | leaM1   | prcCat1 | ent1 | tar1   | panAa2 | mMm1      | 0.0319466          | Hydrolyse activity |
| 13  | 2618  | 26487  | 350626  | 2615   | 348179 | 0.00001704 | 0.00001704 | 0.00059711  | 1.72221    | 0.02663    | leaM1   | prcCat1 | ent1 | tar1   | panAa2 | mMm1      | 0.0319466          | Hydrolyse activity |
| 13  | 1218  | 12946  | 364665  | 1218   | 364665 | 0.00001704 | 0.00001704 | 0.00059711  | 1.72221    | 0.02663    | leaM1   | prcCat1 | ent1 | tar1   | panAa2 | mMm1      | 0.0319466          | Hydrolyse activity |
| 5   | 639   | 17247  | 261200  | 634    | 261483 | 0.00001774 | 0.00001774 | 0.00028995  | 1.04138    | 0.03904    | leaM1   | prcCat1 | ent1 | tar1   | panAa2 | mMm1      | 0.0319466          | Hydrolyse activity |
| 26  | 2706  | 29487  | 368020  | 2680   | 368098 | 0.00009948 | 0.00009948 | 0.00135417  | 1.42705    | 0.07659    | leaM1   | prcCat1 | ent1 | tar1   | panAa2 | mMm1      | 0.0307354          | Hydrolyse activity |
| 14  | 2426  | 24724  | 302876  | 2426   | 302876 | 0.00001704 | 0.00001704 | 0.00028995  | 1.04138    | 0.03904    | leaM1   | prcCat1 | ent1 | tar1   | panAa2 | mMm1      | 0.0319466          | Hydrolyse activity |
| 14  | 1641  | 23870  | 365308  | 1627   | 365124 | 0.00041763 | 0.00041763 | 0.0005811   | 1.20208    | 0.35721    | leaM1   | prcCat1 | ent1 | tar1   | panAa2 | mMm1      | 0.0319466          | Hydrolyse activity |
| 14  | 904   | 11927  | 180484  | 905    | 119323 | 0.00001704 | 0.00001704 | 0.00028995  | 1.04138    | 0.03904    | leaM1   | prcCat1 | ent1 | tar1   | panAa2 | mMm1      | 0.0319466          | Hydrolyse activity |
| 26  | 2713  | 29679  | 368020  | 2727   | 368107 | 0.00001704 | 0.00001704 | 0.00028995  | 1.04138    | 0.03904    | leaM1   | prcCat1 | ent1 | tar1   | panAa2 | mMm1      | 0.0319466          | Hydrolyse activity |
| 13  | 1172  | 12395  | 192535  | 1172   | 192535 | 0.00001704 | 0.00001704 | 0.00028995  | 1.04138    | 0.03904    | leaM1   | prcCat1 | ent1 | tar1   | panAa2 | mMm1      | 0.0319466          | Hydrolyse activity |
| 2   | 169   | 27824  | 427362  | 167    | 417938 | 0.045275   | 0.045275   | 1.718065    | 0.178928   | 0.30999    | leaM1   | prcCat1 | ent1 | tar1   | panAa2 | mMm1      | 0.0307354          | Hydrolyse activity |
| 6   | 530   | 23887  | 337289  | 524    | 337480 | 0.00021730 | 0.00021730 | 0.00025499  | 1.05052    | 0.28874    | leaM1   | prcCat1 | ent1 | tar1   | panAa2 | mMm1      | 0.0307354          | Hydrolyse activity |
| 10  | 2127  | 24724  | 327947  | 2127   | 327947 | 0.00021730 | 0.00021730 | 0.00025499  | 1.05052    | 0.28874    | leaM1   | prcCat1 | ent1 | tar1   | panAa2 | mMm1      | 0.0307354          | Hydrolyse activity |
| 19  | 2441  | 29089  | 295362  | 2422   | 290469 | 0.00001704 | 0.00001704 | 0.000995229 | 1.240487   | 0.37704    | leaM1   | prcCat1 | ent1 | tar1   | panAa2 | mMm1      | 0.0319466          | Hydrolyse activity |
| 19  | 2159  | 230421 | 350181  | 2159   | 350181 | 0.00001704 | 0.00001704 | 0.000995229 | 1.240487   | 0.37704    | leaM1   | prcCat1 | ent1 | tar1   | panAa2 | mMm1      | 0.0319466          | Hydrolyse activity |
| 0   | 185   | 27983  | 440856  | 185    | 440856 | 0.00001704 | 0.00001704 | 0.000995229 | 1.240487   | 0.37704    | leaM1   | prcCat1 | ent1 | tar1   | panAa2 | mMm1      | 0.0319466          | Hydrolyse activity |
| 0   | 40987 | 429887 | 440856  | 40987  | 440856 | 0.00001704 | 0.00001704 | 0.000995229 | 1.240487   | 0.37704    | leaM1   | prcCat1 | ent1 | tar1   | panAa2 | mMm1      | 0.0319466          | Hydrolyse activity |
| 12  | 2128  | 20200  | 364779  | 2116   | 362579 | 0.00001957 | 0.00001957 | 0.0047419   | 1.30839    | 0.13205    | leaM1   | prcCat1 | ent1 | tar1   | panAa2 | mMm1      | 0.0319466          | Hydrolyse activity |
| 21  | 2798  | 14679  | 239955  | 2777   | 238923 | 0.00116039 | 0.00116039 | 0.0041312   | 1.27408    | 0.38741    | leaM1   | prcCat1 | ent1 | tar1   | panAa2 | mMm1      | 0.0319466          | Hydrolyse activity |
| 21  | 2281  | 15629  | 243465  | 2262   | 243058 | 0.00001957 | 0.00001957 | 0.00094051  | 1.30516    | 0.23667    | leaM1   | prcCat1 | ent1 | tar1   | panAa2 | mMm1      | 0.0319466          | Hydrolyse activity |
| 15  | 2300  | 1852   | 280339  | 2285   | 279036 | 0.00081815 | 0.00081815 | 0.00080838  | 1.08749    | 1.5        | leaM1   | prcCat1 | ent1 | tar1   | panAa2 | mMm1      | 0.0319466          | Hydrolyse activity |
| 15  | 2845  | 2136   | 345455  | 2845   | 345455 | 0.00001704 | 0.00001704 | 0.000995229 | 1.240487   | 0.37704    | leaM1   | prcCat1 | ent1 | tar1   | panAa2 | mMm1      | 0.0319466          | Hydrolyse activity |
| 10  | 1247  | 17127  | 280138  | 1237   | 280138 | 0.00041763 | 0.00041763 | 0.0005811   | 1.39991    | 0.15571    | leaM1   | prcCat1 | ent1 | tar1   | panAa2 | mMm1      | 0.0319466          | Hydrolyse activity |
| 15  | 1839  | 14681  | 228453  | 1824   | 227870 | 0.00071744 | 0.00071744 | 0.0010893   | 1.444202   | 0.16822    | leaM1   | prcCat1 | ent1 | tar1   | panAa2 | mMm1      | 0.0319466          | Hydrolyse activity |
| 15  | 3174  | 31024  | 31024   | 3174   | 31024  | 0.00041763 | 0.00041763 | 0.00092485  | 1.22939    | 0.47856    | leaM1   | prcCat1 | ent1 | tar1   | panAa2 | mMm1      | 0.0319466          | Hydrolyse activity |
| 10  | 2580  | 37684  | 37684   | 2580   | 37684  | 0.00041763 | 0.00041763 | 0.00092485  | 1.22939    | 0.47856    | leaM1   | prcCat1 | ent1 | tar1   | panAa2 | mMm1      | 0.0319466          | Hydrolyse activity |
| 10  | 2629  | 2629   | 404454  | 2629   | 404454 | 0.00041763 | 0.00041763 | 0.00092485  | 1.22939    | 0.47856    | leaM1   | prcCat1 | ent1 | tar1   | panAa2 | mMm1      | 0.0319466          | Hydrolyse activity |
| 1   | 112   | 18684  | 286224  | 111    | 286070 | 0.4693245  | 0.4693245  | 5.9331351   | 1.24246    | 0.40394    | leaM1   | prcCat1 | ent1 | tar1   | panAa2 | mMm1      | 0.0319466          | Hydrolyse activity |
| 20  | 2024  | 2024   | 291524  | 2024   | 291524 | 0.00001704 | 0.00001704 | 0.00028995  | 1.04138    | 0.03904    | leaM1   | prcCat1 | ent1 | tar1   | panAa2 | mMm1      | 0.0319466          | Hydrolyse activity |
| 1   | 636   | 12147  | 205027  | 631    | 205210 | 0.00040775 | 0.00040775 | 0.0009376   | 0.90732    | 1.5        | leaM1   | prcCat1 | ent1 | tar1   | panAa2 | mMm1      | 0.0319466          | Hydrolyse activity |
| 1   | 385   | 34264  | 487386  | 384    | 487422 | 0.7004425  | 0.7004425  | 2.91262     | 0.13022    | 0.53304    | leaM1   | prcCat1 | ent1 | tar1   | panAa2 | mMm1      | 0.0319466          | Hydrolyse activity |
| 1   | 333   | 32599  | 345696  | 334    | 346066 | 0.00041763 | 0.00041763 | 0.00024601  | 1.74653    | 0.01568    | leaM1   | prcCat1 | ent1 | tar1   | panAa2 | mMm1      | 0.0319466          | Hydrolyse activity |
| 2   | 267   | 14138  | 240388  | 265    | 142888 | 0.00041763 | 0.00041763 | 0.00020854  | 1.19933    | 0.70071    | leaM1   | prcCat1 | ent1 | tar1   | panAa2 | mMm1      | 0.0319466          | Hydrolyse activity |
| 2</ |       |        |         |        |        |            |            |             |            |            |         |         |      |        |        |           |                    |                    |



|    |        |          |          |        |          |            |            |            |            |            |        |        |         |         |         |            |                     |
|----|--------|----------|----------|--------|----------|------------|------------|------------|------------|------------|--------|--------|---------|---------|---------|------------|---------------------|
| 15 | 2462   | 28424    | 3923504  | 2446   | 3983980  | 0.00007392 | 0.00056205 | 0.89651    | 0.81137    | omdgnr     | mmMnFr | rMmMzQ | tuTtRtL | pMvmmn  | carfMzQ | 0.81140179 | Hydrolyase activity |
| 16 | 22093  | 23194    | 3000071  | 2194   | 3000071  | 0.00007392 | 0.00056205 | 0.89651    | 0.81137    | omdgnr     | mmMnFr | rMmMzQ | tuTtRtL | pMvmmn  | carfMzQ | 0.81140179 | Hydrolyase activity |
| 17 | 2729   | 17413    | 241696   | 2706   | 246983   | 0.00110196 | 0.00110196 | 0.00110196 | 0.00110196 | 0.00110196 | mmMnFr | rMmMzQ | vMmMzQ  | tuTtRtL | carfMzQ | 0.81140179 | Hydrolyase activity |
| 18 | 701    | 23482    | 232640   | 699    | 232640   | 0.00007392 | 0.00056205 | 0.89651    | 0.81137    | omdgnr     | mmMnFr | rMmMzQ | vMmMzQ  | tuTtRtL | carfMzQ | 0.81140179 | Hydrolyase activity |
| 19 | 25790  | 24190    | 3028621  | 25783  | 3028621  | 0.00007392 | 0.00056205 | 0.89651    | 0.81137    | omdgnr     | mmMnFr | rMmMzQ | vMmMzQ  | tuTtRtL | carfMzQ | 0.81140179 | Hydrolyase activity |
| 20 | 335    | 24039    | 482339   | 333    | 478919   | 0.00007392 | 0.00056205 | 0.89651    | 0.81137    | omdgnr     | mmMnFr | rMmMzQ | vMmMzQ  | tuTtRtL | carfMzQ | 0.81140179 | Hydrolyase activity |
| 21 | 14     | 29400    | 562000   | 14     | 562000   | 0.00007392 | 0.00056205 | 0.89651    | 0.81137    | omdgnr     | mmMnFr | rMmMzQ | vMmMzQ  | tuTtRtL | carfMzQ | 0.81140179 | Hydrolyase activity |
| 22 | 34     | 28147    | 354884   | 373    | 353760   | 0.00007392 | 0.00056205 | 0.89651    | 0.81137    | omdgnr     | mmMnFr | rMmMzQ | vMmMzQ  | tuTtRtL | carfMzQ | 0.81140179 | Hydrolyase activity |
| 23 | 12107  | 12107    | 12107    | 12107  | 12107    | 0.00007392 | 0.00056205 | 0.89651    | 0.81137    | omdgnr     | mmMnFr | rMmMzQ | vMmMzQ  | tuTtRtL | carfMzQ | 0.81140179 | Hydrolyase activity |
| 24 | 0      | 19621    | 19621    | 0      | 19621    | 0.00007392 | 0.00056205 | 0.89651    | 0.81137    | omdgnr     | mmMnFr | rMmMzQ | vMmMzQ  | tuTtRtL | carfMzQ | 0.81140179 | Hydrolyase activity |
| 25 | 212    | 19928    | 280520   | 212    | 280520   | 0.00007392 | 0.00056205 | 0.89651    | 0.81137    | omdgnr     | mmMnFr | rMmMzQ | vMmMzQ  | tuTtRtL | carfMzQ | 0.81140179 | Hydrolyase activity |
| 26 | 75     | 222820   | 2207900  | 75     | 222820   | 0.00007392 | 0.00056205 | 0.89651    | 0.81137    | omdgnr     | mmMnFr | rMmMzQ | vMmMzQ  | tuTtRtL | carfMzQ | 0.81140179 | Hydrolyase activity |
| 27 | 0      | 13       | 29402    | 0      | 29402    | 0.00007392 | 0.00056205 | 0.89651    | 0.81137    | omdgnr     | mmMnFr | rMmMzQ | vMmMzQ  | tuTtRtL | carfMzQ | 0.81140179 | Hydrolyase activity |
| 28 | 248    | 19745    | 248173   | 247    | 248173   | 0.00007392 | 0.00056205 | 0.89651    | 0.81137    | omdgnr     | mmMnFr | rMmMzQ | vMmMzQ  | tuTtRtL | carfMzQ | 0.81140179 | Hydrolyase activity |
| 29 | 3      | 1633     | 4500773  | 3      | 4500773  | 0.00007392 | 0.00056205 | 0.89651    | 0.81137    | omdgnr     | mmMnFr | rMmMzQ | vMmMzQ  | tuTtRtL | carfMzQ | 0.81140179 | Hydrolyase activity |
| 30 | 0      | 23       | 23204    | 0      | 23204    | 0.00007392 | 0.00056205 | 0.89651    | 0.81137    | omdgnr     | mmMnFr | rMmMzQ | vMmMzQ  | tuTtRtL | carfMzQ | 0.81140179 | Hydrolyase activity |
| 31 | 238    | 12876    | 12876    | 238    | 12876    | 0.00007392 | 0.00056205 | 0.89651    | 0.81137    | omdgnr     | mmMnFr | rMmMzQ | vMmMzQ  | tuTtRtL | carfMzQ | 0.81140179 | Hydrolyase activity |
| 32 | 120    | 15118    | 227478   | 118    | 227980   | 0.00007392 | 0.00056205 | 0.89651    | 0.81137    | omdgnr     | mmMnFr | rMmMzQ | vMmMzQ  | tuTtRtL | carfMzQ | 0.81140179 | Hydrolyase activity |
| 33 | 179    | 179      | 179      | 179    | 179      | 0.00007392 | 0.00056205 | 0.89651    | 0.81137    | omdgnr     | mmMnFr | rMmMzQ | vMmMzQ  | tuTtRtL | carfMzQ | 0.81140179 | Hydrolyase activity |
| 34 | 127    | 20993    | 346418   | 126    | 346888   | 0.00007392 | 0.00056205 | 0.89651    | 0.81137    | omdgnr     | mmMnFr | rMmMzQ | vMmMzQ  | tuTtRtL | carfMzQ | 0.81140179 | Hydrolyase activity |
| 35 | 122    | 438411   | 438411   | 122    | 438411   | 0.00007392 | 0.00056205 | 0.89651    | 0.81137    | omdgnr     | mmMnFr | rMmMzQ | vMmMzQ  | tuTtRtL | carfMzQ | 0.81140179 | Hydrolyase activity |
| 36 | 21     | 28328    | 28328    | 21     | 28328    | 0.00007392 | 0.00056205 | 0.89651    | 0.81137    | omdgnr     | mmMnFr | rMmMzQ | vMmMzQ  | tuTtRtL | carfMzQ | 0.81140179 | Hydrolyase activity |
| 37 | 70     | 17381    | 246307   | 69     | 247956   | 0.00007392 | 0.00056205 | 0.89651    | 0.81137    | omdgnr     | mmMnFr | rMmMzQ | vMmMzQ  | tuTtRtL | carfMzQ | 0.81140179 | Hydrolyase activity |
| 38 | 200    | 170620   | 170620   | 200    | 170620   | 0.00007392 | 0.00056205 | 0.89651    | 0.81137    | omdgnr     | mmMnFr | rMmMzQ | vMmMzQ  | tuTtRtL | carfMzQ | 0.81140179 | Hydrolyase activity |
| 39 | 172    | 26666    | 368888   | 168    | 368888   | 0.00007392 | 0.00056205 | 0.89651    | 0.81137    | omdgnr     | mmMnFr | rMmMzQ | vMmMzQ  | tuTtRtL | carfMzQ | 0.81140179 | Hydrolyase activity |
| 40 | 3173   | 424840   | 417513   | 3169   | 424840   | 0.00007392 | 0.00056205 | 0.89651    | 0.81137    | omdgnr     | mmMnFr | rMmMzQ | vMmMzQ  | tuTtRtL | carfMzQ | 0.81140179 | Hydrolyase activity |
| 41 | 509    | 438454   | 448832   | 508    | 448832   | 0.00007392 | 0.00056205 | 0.89651    | 0.81137    | omdgnr     | mmMnFr | rMmMzQ | vMmMzQ  | tuTtRtL | carfMzQ | 0.81140179 | Hydrolyase activity |
| 42 | 164    | 30778    | 460323   | 163    | 460346   | 0.00007392 | 0.00056205 | 0.89651    | 0.81137    | omdgnr     | mmMnFr | rMmMzQ | vMmMzQ  | tuTtRtL | carfMzQ | 0.81140179 | Hydrolyase activity |
| 43 | 123    | 39596    | 39596    | 123    | 39596    | 0.00007392 | 0.00056205 | 0.89651    | 0.81137    | omdgnr     | mmMnFr | rMmMzQ | vMmMzQ  | tuTtRtL | carfMzQ | 0.81140179 | Hydrolyase activity |
| 44 | 236    | 21406    | 222052   | 236    | 222052   | 0.00007392 | 0.00056205 | 0.89651    | 0.81137    | omdgnr     | mmMnFr | rMmMzQ | vMmMzQ  | tuTtRtL | carfMzQ | 0.81140179 | Hydrolyase activity |
| 45 | 18     | 13651    | 13651    | 18     | 13651    | 0.00007392 | 0.00056205 | 0.89651    | 0.81137    | omdgnr     | mmMnFr | rMmMzQ | vMmMzQ  | tuTtRtL | carfMzQ | 0.81140179 | Hydrolyase activity |
| 46 | 345    | 2973     | 374843   | 342    | 375708   | 0.00007392 | 0.00056205 | 0.89651    | 0.81137    | omdgnr     | mmMnFr | rMmMzQ | vMmMzQ  | tuTtRtL | carfMzQ | 0.81140179 | Hydrolyase activity |
| 47 | 320    | 2833     | 350308   | 319    | 350308   | 0.00007392 | 0.00056205 | 0.89651    | 0.81137    | omdgnr     | mmMnFr | rMmMzQ | vMmMzQ  | tuTtRtL | carfMzQ | 0.81140179 | Hydrolyase activity |
| 48 | 213    | 45478    | 478841   | 213    | 478841   | 0.00007392 | 0.00056205 | 0.89651    | 0.81137    | omdgnr     | mmMnFr | rMmMzQ | vMmMzQ  | tuTtRtL | carfMzQ | 0.81140179 | Hydrolyase activity |
| 49 | 144    | 23365    | 291435   | 143    | 291435   | 0.00007392 | 0.00056205 | 0.89651    | 0.81137    | omdgnr     | mmMnFr | rMmMzQ | vMmMzQ  | tuTtRtL | carfMzQ | 0.81140179 | Hydrolyase activity |
| 50 | 400    | 18375    | 4925720  | 400    | 4925720  | 0.00007392 | 0.00056205 | 0.89651    | 0.81137    | omdgnr     | mmMnFr | rMmMzQ | vMmMzQ  | tuTtRtL | carfMzQ | 0.81140179 | Hydrolyase activity |
| 51 | 206    | 4431     | 557370   | 206    | 557370   | 0.00007392 | 0.00056205 | 0.89651    | 0.81137    | omdgnr     | mmMnFr | rMmMzQ | vMmMzQ  | tuTtRtL | carfMzQ | 0.81140179 | Hydrolyase activity |
| 52 | 373    | 28188    | 37328    | 373    | 28188    | 0.00007392 | 0.00056205 | 0.89651    | 0.81137    | omdgnr     | mmMnFr | rMmMzQ | vMmMzQ  | tuTtRtL | carfMzQ | 0.81140179 | Hydrolyase activity |
| 53 | 143    | 34271    | 467747   | 140    | 467747   | 0.00007392 | 0.00056205 | 0.89651    | 0.81137    | omdgnr     | mmMnFr | rMmMzQ | vMmMzQ  | tuTtRtL | carfMzQ | 0.81140179 | Hydrolyase activity |
| 54 | 387    | 33995    | 464802   | 381    | 464802   | 0.00007392 | 0.00056205 | 0.89651    | 0.81137    | omdgnr     | mmMnFr | rMmMzQ | vMmMzQ  | tuTtRtL | carfMzQ | 0.81140179 | Hydrolyase activity |
| 55 | 419    | 49420    | 588122   | 419    | 588122   | 0.00007392 | 0.00056205 | 0.89651    | 0.81137    | omdgnr     | mmMnFr | rMmMzQ | vMmMzQ  | tuTtRtL | carfMzQ | 0.81140179 | Hydrolyase activity |
| 56 | 180    | 37208    | 468380   | 176    | 468380   | 0.00007392 | 0.00056205 | 0.89651    | 0.81137    | omdgnr     | mmMnFr | rMmMzQ | vMmMzQ  | tuTtRtL | carfMzQ | 0.81140179 | Hydrolyase activity |
| 57 | 200    | 19044    | 21000208 | 200    | 21000208 | 0.00007392 | 0.00056205 | 0.89651    | 0.81137    | omdgnr     | mmMnFr | rMmMzQ | vMmMzQ  | tuTtRtL | carfMzQ | 0.81140179 | Hydrolyase activity |
| 58 | 311    | 29604    | 398756   | 309    | 398756   | 0.00007392 | 0.00056205 | 0.89651    | 0.81137    | omdgnr     | mmMnFr | rMmMzQ | vMmMzQ  | tuTtRtL | carfMzQ | 0.81140179 | Hydrolyase activity |
| 59 | 37018  | 37018    | 37018    | 37018  | 37018    | 0.00007392 | 0.00056205 | 0.89651    | 0.81137    | omdgnr     | mmMnFr | rMmMzQ | vMmMzQ  | tuTtRtL | carfMzQ | 0.81140179 | Hydrolyase activity |
| 60 | 306    | 181120   | 228620   | 304    | 228620   | 0.00007392 | 0.00056205 | 0.89651    | 0.81137    | omdgnr     | mmMnFr | rMmMzQ | vMmMzQ  | tuTtRtL | carfMzQ | 0.81140179 | Hydrolyase activity |
| 61 | 129    | 36005    | 483839   | 128    | 483839   | 0.00007392 | 0.00056205 | 0.89651    | 0.81137    | omdgnr     | mmMnFr | rMmMzQ | vMmMzQ  | tuTtRtL | carfMzQ | 0.81140179 | Hydrolyase activity |
| 62 | 104    | 42645    | 489567   | 104    | 489567   | 0.00007392 | 0.00056205 | 0.89651    | 0.81137    | omdgnr     | mmMnFr | rMmMzQ | vMmMzQ  | tuTtRtL | carfMzQ | 0.81140179 | Hydrolyase activity |
| 63 | 232    | 20730    | 296480   | 226    | 296480   | 0.00007392 | 0.00056205 | 0.89651    | 0.81137    | omdgnr     | mmMnFr | rMmMzQ | vMmMzQ  | tuTtRtL | carfMzQ | 0.81140179 | Hydrolyase activity |
| 64 | 133    | 31964    | 31964    | 133    | 31964    | 0.00007392 | 0.00056205 | 0.89651    | 0.81137    | omdgnr     | mmMnFr | rMmMzQ | vMmMzQ  | tuTtRtL | carfMzQ | 0.81140179 | Hydrolyase activity |
| 65 | 289    | 28118    | 447120   | 286    | 444032   | 0.00007392 | 0.00056205 | 0.89651    | 0.81137    | omdgnr     | mmMnFr | rMmMzQ | vMmMzQ  | tuTtRtL | carfMzQ | 0.81140179 | Hydrolyase activity |
| 66 | 463    | 33916    | 520333   | 462    | 519272   | 0.00007392 | 0.00056205 | 0.89651    | 0.81137    | omdgnr     | mmMnFr | rMmMzQ | vMmMzQ  | tuTtRtL | carfMzQ | 0.81140179 | Hydrolyase activity |
| 67 | 311    | 33876    | 481726   | 310    | 481726   | 0.00007392 | 0.00056205 | 0.89651    | 0.81137    | omdgnr     | mmMnFr | rMmMzQ | vMmMzQ  | tuTtRtL | carfMzQ | 0.81140179 | Hydrolyase activity |
| 68 | 20     | 23876    | 308886   | 18     | 308886   | 0.00007392 | 0.00056205 | 0.89651    | 0.81137    | omdgnr     | mmMnFr | rMmMzQ | vMmMzQ  | tuTtRtL | carfMzQ | 0.81140179 | Hydrolyase activity |
| 69 | 207    | 40020398 | 4159527  | 207    | 4159527  | 0.00007392 | 0.00056205 | 0.89651    | 0.81137    | omdgnr     | mmMnFr | rMmMzQ | vMmMzQ  | tuTtRtL | carfMzQ | 0.81140179 | Hydrolyase activity |
| 70 | 157    | 18688    | 279808   | 155    | 279848   | 0.00007392 | 0.00056205 | 0.89651    | 0.81137    | omdgnr     | mmMnFr | rMmMzQ | vMmMzQ  | tuTtRtL | carfMzQ | 0.81140179 | Hydrolyase activity |
| 71 | 184809 | 184809   | 184809   | 184809 | 184809   | 0.00007392 | 0.00056205 | 0.89651    | 0.81137    | omdgnr     | mmMnFr | rMmMzQ | vMmMzQ  | tuTtRtL | carfMzQ | 0.81140179 | Hydrolyase activity |
| 72 | 4      | 235      | 31871    | 4      | 31871    | 0.00007392 | 0.00056205 | 0.89651    | 0.81137    | omdgnr     | mmMnFr | rMmMzQ | vMmMzQ  | tuTtRtL | carfMzQ | 0.81140179 | Hydrolyase activity |
| 73 | 68     | 17805    | 280775   | 68     | 280775   | 0.00007392 | 0.00056205 | 0.89651    | 0.81137    | omdgnr     | mmMnFr | rMmMzQ | vMmMzQ  | tuTtRtL | carfMzQ | 0.81140179 | Hydrolyase activity |
| 74 | 398    | 33986    | 439846   | 41     | 439846   | 0.00007392 | 0.00056205 | 0.89651    | 0.81137    | omdgnr     | mmMnFr | rMmMzQ | vMmMzQ  | tuTtRtL | carfMzQ | 0.81140179 | Hydrolyase activity |
| 75 | 403    | 37483    | 511933   | 400    | 507470   | 0.00007392 | 0.00056205 | 0.89651    | 0.81137    | omdgnr     | mmMnFr | rMmMzQ | vMmMzQ  | tuTtRtL | carfMzQ | 0.81140179 | Hydrolyase activity |
| 76 | 232005 | 232005   | 232005   | 232005 | 232005   | 0.00007392 | 0.00056205 | 0.89651    | 0.81137    | omdgnr     | mmMnFr | rMmMzQ | vMmMzQ  | tuTtRtL | carfMzQ | 0.81140179 | Hydrolyase activity |
| 77 | 277    | 22490    | 327306   | 274    | 327306   | 0.00007392 | 0.00056    |            |            |            |        |        |         |         |         |            |                     |



|    |       |        |        |        |         |             |            |          |            |    |     |      |           |        |        |            |                    |
|----|-------|--------|--------|--------|---------|-------------|------------|----------|------------|----|-----|------|-----------|--------|--------|------------|--------------------|
| 3  | 324   | 16796  | 267025 | 321    | 265429  | 0.00021336  | 0.00078814 | 1.474261 | 4.683936   | na | mnp | dndi | (wpch) tv | mycast | carfm2 | 0.46021737 | Hydrosave activity |
| 4  | 45251 | 17728  | 261025 | 322    | 213288  | 0.00017328  | 0.00354571 | 1.364025 | 0.023129   | na | mnp | dndi | (wpch) tv | mycast | carfm2 | 0.46021737 | Hydrosave activity |
| 5  | 2739  | 17124  | 195163 | 2720   | 290649  | 0.00094878  | 0.00109554 | 1.81309  | 0.405564   | na | mnp | dndi | (wpch) tv | mycast | carfm2 | 0.46021737 | Hydrosave activity |
| 6  | 281   | 11502  | 187482 | 2729   | 188320  | 0.00024982  | 0.00073883 | 1.65524  | 0.602743   | na | mnp | dndi | (wpch) tv | mycast | carfm2 | 0.46021737 | Hydrosave activity |
| 7  | 286   | 12882  | 184555 | 2842   | 2286638 | 0.00028892  | 0.00529751 | 1.64712  | 0.020217   | na | mnp | dndi | (wpch) tv | mycast | carfm2 | 0.46021737 | Hydrosave activity |
| 10 | 210   | 15120  | 161240 | 2100   | 162520  | 0.00017208  | 0.00035488 | 1.61069  | 0.095814   | na | mnp | dndi | (wpch) tv | mycast | carfm2 | 0.46021737 | Hydrosave activity |
| 11 | 781   | 19275  | 178    | 20275  | 19275   | 0.000022068 | 0.00014838 | 1.65524  | 0.444633   | na | mnp | dndi | (wpch) tv | mycast | carfm2 | 0.46021737 | Hydrosave activity |
| 12 | 7     | 985    | 17357  | 978    | 247811  | 0.00034748  | 0.00047997 | 1.534269 | 8.860838   | na | mnp | dndi | (wpch) tv | mycast | carfm2 | 0.46021737 | Hydrosave activity |
| 13 | 3120  | 17437  | 200986 | 3120   | 200986  | 0.00012484  | 0.00024814 | 1.555849 | 0.497973   | na | mnp | dndi | (wpch) tv | mycast | carfm2 | 0.46021737 | Hydrosave activity |
| 4  | 830   | 12026  | 196873 | 826    | 198923  | 0.00051933  | 0.00043239 | 1.632851 | 1.544551   | na | mnp | dndi | (wpch) tv | mycast | carfm2 | 0.46021737 | Hydrosave activity |
| 8  | 951   | 12236  | 198174 | 950    | 198174  | 0.00047887  | 0.00037752 | 1.605208 | 0.401138   | na | mnp | dndi | (wpch) tv | mycast | carfm2 | 0.46021737 | Hydrosave activity |
| 15 | 4211  | 18549  | 4186   | 4186   | 4186    | 0.00020513  | 0.00037752 | 1.622008 | 0.030318   | na | mnp | dndi | (wpch) tv | mycast | carfm2 | 0.46021737 | Hydrosave activity |
| 11 | 1375  | 14482  | 190265 | 1364   | 189123  | 0.00067374  | 0.00058021 | 1.512625 | 1.33993    | na | mnp | dndi | (wpch) tv | mycast | carfm2 | 0.46021737 | Hydrosave activity |
| 13 | 1588  | 18773  | 190385 | 1588   | 190385  | 0.00037155  | 0.00032873 | 1.518271 | 0.273802   | na | mnp | dndi | (wpch) tv | mycast | carfm2 | 0.46021737 | Hydrosave activity |
| 15 | 1761  | 12964  | 216029 | 1736   | 214785  | 0.00082925  | 0.00155195 | 1.47512  | 0.242031   | na | mnp | dndi | (wpch) tv | mycast | carfm2 | 0.46021737 | Hydrosave activity |
| 13 | 1900  | 19306  | 259720 | 1900   | 259720  | 0.00037155  | 0.00037155 | 1.5011   | 0.333838   | na | mnp | dndi | (wpch) tv | mycast | carfm2 | 0.46021737 | Hydrosave activity |
| 7  | 159   | 19815  | 286523 | 152    | 286523  | 0.00014429  | 0.00028624 | 1.892142 | 0.012106   | na | mnp | dndi | (wpch) tv | mycast | carfm2 | 0.46021737 | Hydrosave activity |
| 1  | 287   | 23825  | 200721 | 286    | 200721  | 0.00037155  | 0.00049875 | 1.531788 | 0.513788   | na | mnp | dndi | (wpch) tv | mycast | carfm2 | 0.46021737 | Hydrosave activity |
| 1  | 1935  | 86     | 207856 | 86     | 207856  | 0.00078814  | 5.2143E-05 | 1.638909 | 0.448354   | na | mnp | dndi | (wpch) tv | mycast | carfm2 | 0.46021737 | Hydrosave activity |
| 8  | 1348  | 16271  | 251669 | 1340   | 255893  | 0.00044782  | 0.00049127 | 1.514836 | 0.358361   | na | mnp | dndi | (wpch) tv | mycast | carfm2 | 0.46021737 | Hydrosave activity |
| 5  | 290   | 245272 | 287    | 245272 | 287     | 0.00012568  | 0.00012568 | 1.682526 | 0.00012568 | na | mnp | dndi | (wpch) tv | mycast | carfm2 | 0.46021737 | Hydrosave activity |
| 6  | 807   | 160739 | 861    | 168756 | 861     | 0.00051979  | 0.00048747 | 1.215402 | 0.657302   | na | mnp | dndi | (wpch) tv | mycast | carfm2 | 0.46021737 | Hydrosave activity |
| 27 | 2157  | 14691  | 234407 | 2140   | 237026  | 0.00094659  | 0.0018224  | 1.365084 | 0.26292    | na | mnp | dndi | (wpch) tv | mycast | carfm2 | 0.46021737 | Hydrosave activity |
| 22 | 2298  | 23986  | 2777   | 23986  | 2777    | 0.00016020  | 0.00044512 | 1.22748  | 0.18374    | na | mnp | dndi | (wpch) tv | mycast | carfm2 | 0.46021737 | Hydrosave activity |
| 20 | 1935  | 205126 | 1915   | 207574 | 1915    | 0.00076493  | 0.00123363 | 1.634569 | 0.204666   | na | mnp | dndi | (wpch) tv | mycast | carfm2 | 0.46021737 | Hydrosave activity |
| 20 | 3206  | 177025 | 5263   | 232444 | 5263    | 0.00031643  | 0.00042848 | 1.387626 | 1.02714    | na | mnp | dndi | (wpch) tv | mycast | carfm2 | 0.46021737 | Hydrosave activity |
| 23 | 2360  | 18335  | 289721 | 2337   | 286286  | 0.00081782  | 0.00125411 | 1.534882 | 0.503274   | na | mnp | dndi | (wpch) tv | mycast | carfm2 | 0.46021737 | Hydrosave activity |
| 29 | 2942  | 24688  | 2923   | 212483 | 2923    | 0.00021738  | 0.00031643 | 1.602519 | 0.021078   | na | mnp | dndi | (wpch) tv | mycast | carfm2 | 0.46021737 | Hydrosave activity |
| 7  | 1231  | 22211  | 206746 | 1246   | 206746  | 0.00037155  | 0.00072516 | 1.593138 | 0.00037155 | na | mnp | dndi | (wpch) tv | mycast | carfm2 | 0.46021737 | Hydrosave activity |
| 47 | 5881  | 18207  | 227379 | 5834   | 225959  | 0.00029726  | 0.00046088 | 1.33388  | 0.015866   | na | mnp | dndi | (wpch) tv | mycast | carfm2 | 0.46021737 | Hydrosave activity |
| 44 | 5281  | 18121  | 211147 | 5287   | 211070  | 0.00029726  | 0.00038652 | 1.34855  | 0.025274   | na | mnp | dndi | (wpch) tv | mycast | carfm2 | 0.46021737 | Hydrosave activity |
| 35 | 3523  | 18749  | 202633 | 3488   | 202633  | 0.00037155  | 0.00029256 | 1.609531 | 0.00037155 | na | mnp | dndi | (wpch) tv | mycast | carfm2 | 0.46021737 | Hydrosave activity |
| 13 | 2264  | 21117  | 242294 | 2252   | 242294  | 0.00037155  | 0.00030956 | 1.5181   | 0.080795   | na | mnp | dndi | (wpch) tv | mycast | carfm2 | 0.46021737 | Hydrosave activity |
| 14 | 4666  | 19507  | 247362 | 4632   | 248183  | 0.00088872  | 0.00109225 | 1.37862  | 0.300793   | na | mnp | dndi | (wpch) tv | mycast | carfm2 | 0.46021737 | Hydrosave activity |
| 3  | 304   | 29238  | 301    | 29238  | 301     | 0.00037155  | 0.00031342 | 1.65664  | 0.470037   | na | mnp | dndi | (wpch) tv | mycast | carfm2 | 0.46021737 | Hydrosave activity |
| 2  | 2408  | 344417 | 252    | 412576 | 252     | 0.00016020  | 0.00038102 | 1.92521  | 0.158466   | na | mnp | dndi | (wpch) tv | mycast | carfm2 | 0.46021737 | Hydrosave activity |
| 12 | 889   | 18937  | 287525 | 877    | 289309  | 0.00031263  | 0.00059361 | 1.68641  | 0.023842   | na | mnp | dndi | (wpch) tv | mycast | carfm2 | 0.46021737 | Hydrosave activity |
| 11 | 1870  | 19705  | 204    | 200275 | 1870    | 0.00037155  | 0.00037395 | 1.59635  | 0.00037155 | na | mnp | dndi | (wpch) tv | mycast | carfm2 | 0.46021737 | Hydrosave activity |
| 8  | 4694  | 14683  | 245169 | 4638   | 244146  | 0.00013263  | 0.00048185 | 1.383658 | 0.100888   | na | mnp | dndi | (wpch) tv | mycast | carfm2 | 0.46021737 | Hydrosave activity |
| 12 | 2256  | 19224  | 2146   | 200275 | 2256    | 0.00037155  | 0.00037395 | 1.296523 | 0.304827   | na | mnp | dndi | (wpch) tv | mycast | carfm2 | 0.46021737 | Hydrosave activity |
| 27 | 4894  | 17322  | 291324 | 4867   | 289992  | 0.00017926  | 0.00156852 | 1.600363 | 0.855636   | na | mnp | dndi | (wpch) tv | mycast | carfm2 | 0.46021737 | Hydrosave activity |
| 4  | 334   | 22093  | 348463 | 330    | 347520  | 8.8628E-05  | 0.00049494 | 1.210499 | 0.412038   | na | mnp | dndi | (wpch) tv | mycast | carfm2 | 0.46021737 | Hydrosave activity |
| 15 | 1286  | 2311   | 346026 | 1286   | 346026  | 0.00047927  | 0.00094924 | 1.31213  | 0.252826   | na | mnp | dndi | (wpch) tv | mycast | carfm2 | 0.46021737 | Hydrosave activity |
| 20 | 2477  | 18416  | 281478 | 2457   | 287313  | 0.00081665  | 0.00029215 | 1.27262  | 0.253577   | na | mnp | dndi | (wpch) tv | mycast | carfm2 | 0.46021737 | Hydrosave activity |
| 20 | 4215  | 18185  | 262593 | 4215   | 262593  | 0.00037155  | 0.00039377 | 1.62631  | 0.374865   | na | mnp | dndi | (wpch) tv | mycast | carfm2 | 0.46021737 | Hydrosave activity |
| 14 | 4732  | 18429  | 244299 | 4688   | 242981  | 0.00051979  | 0.00029256 | 1.376673 | 0.349504   | na | mnp | dndi | (wpch) tv | mycast | carfm2 | 0.46021737 | Hydrosave activity |
| 14 | 4688  | 18185  | 244299 | 4688   | 244299  | 0.00037155  | 0.00029256 | 1.376673 | 0.349504   | na | mnp | dndi | (wpch) tv | mycast | carfm2 | 0.46021737 | Hydrosave activity |
| 22 | 2670  | 18518  | 304720 | 2648   | 303162  | 0.00087799  | 0.00185493 | 1.365515 | 0.188463   | na | mnp | dndi | (wpch) tv | mycast | carfm2 | 0.46021737 | Hydrosave activity |
| 13 | 2599  | 15027  | 259323 | 2586   | 258426  | 0.00037155  | 0.00086509 | 1.84526  | 0.09915    | na | mnp | dndi | (wpch) tv | mycast | carfm2 | 0.46021737 | Hydrosave activity |
| 13 | 2798  | 19728  | 218425 | 2798   | 218425  | 0.00037155  | 0.00050451 | 1.63216  | 0.00037155 | na | mnp | dndi | (wpch) tv | mycast | carfm2 | 0.46021737 | Hydrosave activity |
| 8  | 813   | 11478  | 197142 | 805    | 196427  | 0.00041156  | 0.00073244 | 1.737885 | 0.153202   | na | mnp | dndi | (wpch) tv | mycast | carfm2 | 0.46021737 | Hydrosave activity |
| 13 | 31683 | 18463  | 210265 | 31683  | 210265  | 0.00037155  | 0.00032073 | 1.622008 | 0.490185   | na | mnp | dndi | (wpch) tv | mycast | carfm2 | 0.46021737 | Hydrosave activity |
| 22 | 2543  | 23743  | 375183 | 2541   | 373149  | 0.00064207  | 0.00098983 | 1.317508 | 0.371533   | na | mnp | dndi | (wpch) tv | mycast | carfm2 | 0.46021737 | Hydrosave activity |
| 25 | 3425  | 27322  | 388406 | 3401   | 386824  | 0.00081665  | 0.00097364 | 1.62061  | 0.839714   | na | mnp | dndi | (wpch) tv | mycast | carfm2 | 0.46021737 | Hydrosave activity |
| 20 | 2612  | 18366  | 292679 | 2612   | 292679  | 0.00064207  | 0.00024885 | 1.25511  | 0.37546    | na | mnp | dndi | (wpch) tv | mycast | carfm2 | 0.46021737 | Hydrosave activity |
| 4  | 766   | 34746  | 461318 | 762    | 460273  | 0.00081665  | 0.00044454 | 1.176522 | 0.512261   | na | mnp | dndi | (wpch) tv | mycast | carfm2 | 0.46021737 | Hydrosave activity |
| 20 | 3129  | 18789  | 3129   | 3129   | 3129    | 0.00037155  | 0.00044454 | 1.176522 | 0.512261   | na | mnp | dndi | (wpch) tv | mycast | carfm2 | 0.46021737 | Hydrosave activity |
| 3  | 822   | 1874   | 148354 | 819    | 147640  | 0.00031263  | 0.00032004 | 1.57872  | 0.59883    | na | mnp | dndi | (wpch) tv | mycast | carfm2 | 0.46021737 | Hydrosave activity |
| 18 | 25868 | 24148  | 263424 | 25868  | 263424  | 0.00037155  | 0.00110509 | 1.60981  | 0.024266   | na | mnp | dndi | (wpch) tv | mycast | carfm2 | 0.46021737 | Hydrosave activity |
| 8  | 839   | 1287   | 202233 | 831    | 201922  | 0.00041922  | 0.00052131 | 1.46002  | 0.270982   | na | mnp | dndi | (wpch) tv | mycast | carfm2 | 0.46021737 | Hydrosave activity |
| 86 | 9068  | 26168  | 392973 | 8992   | 390565  | 0.00029726  | 0.00039511 | 1.32777  | 0.023209   | na | mnp | dndi | (wpch) tv | mycast | carfm2 | 0.46021737 | Hydrosave activity |
| 10 | 2626  | 247996 | 2621   | 2626   | 2621    | 0.00047927  | 0.00029164 | 1.2442   | 0.00029164 | na | mnp | dndi | (wpch) tv | mycast | carfm2 | 0.46021737 | Hydrosave activity |
| 19 | 3486  | 18493  | 3467   | 320365 | 3467    | 0.00011209  | 0.00019685 | 1.83155  | 0.486518   | na | mnp | dndi | (wpch) tv | mycast | carfm2 | 0.46021737 | Hydrosave activity |
| 10 | 4057  | 18207  | 4057   | 4057   | 4057    | 0.00037155  | 0.00016492 | 1.66624  | 0.000267   | na | mnp | dndi | (wpch) tv | mycast | carfm2 | 0.46021737 | Hydrosave activity |
| 2  | 493   | 19095  | 281441 | 491    | 281246  | 0.00017926  | 0.00040739 | 1.642696 | 0.777465   | na | mnp | dndi | (wpch) tv | mycast | carfm2 | 0.46021737 | Hydrosave activity |
| 20 | 1960  | 1282   | 203773 | 1940   | 200051  | 0.00037155  | 0.00029256 | 1.595819 | 0.147437   | na | mnp | dndi | (wpch) tv | mycast | carfm2 | 0.46021737 | Hydrosave activity |
| 28 | 3206  | 2734   | 384543 | 3178   | 381839  | 0.00081782  | 0.00031263 | 1.22958  | 0.292107   | na | mnp | dndi | (wpch) tv | mycast | carfm2 | 0.46021737 | Hydrosave activity |
| 28 | 1841  | 18379  | 366407 | 1837   | 366407  | 0.00037155  | 0.00029256 | 1.319    |            |    |     |      |           |        |        |            |                    |



|    |       |        |          |        |             |             |              |            |            |         |         |         |         |            |              |              |              |
|----|-------|--------|----------|--------|-------------|-------------|--------------|------------|------------|---------|---------|---------|---------|------------|--------------|--------------|--------------|
| 1  | 426   | 13802  | 281306   | 425    | 280204      | 0.00011289  | 7.246338E-05 | 4.78907    | 0.792926   | galact  | tarSet1 | (NP)ch2 | mydost  | carfem2    | 0.77993899   | Brush border |              |
| 2  | 15421 | 28454  | 465669   | 464    | 461120      | 0.00010498  | 0.00010288   | 1.010218   | 0.212838   | carbam  | tarSet1 | carbam  | tarSet1 | carbam     | 0.77993899   | Brush border |              |
| 3  | 2309  | 28842  | 420892   | 2296   | 428800      | 0.00051947  | 0.00052341   | 1.10994    | 0.658937   | carfem1 | carSet2 | galact  | carSet1 | tarSet1    | 0.65893993   | Brush border |              |
| 4  | 206   | 2072   | 205748   | 204    | 203996      | 0.70735E-05 | 0.00128486   | 1.055022   | 0.342729   | carfem1 | carSet1 | carbam  | tarSet1 | carSet2    | 0.34260005   | Brush border |              |
| 5  | 31912 | 43876  | 738925   | 730    | 717217      | 0.00117581  | 0.00116537   | 1.31666    | 0.708983   | carfem1 | carSet1 | carbam  | tarSet1 | carSet2    | 0.70898309   | Brush border |              |
| 6  | 1537  | 10567  | 221594   | 1525   | 220381      | 0.00006896  | 0.00018928   | 0.4272     | 0.038866   | carfem1 | carSet1 | carbam  | tarSet1 | carSet2    | 0.03886609   | Brush border |              |
| 7  | 24984 | 34984  | 595426   | 592    | 591432      | 0.00004626  | 0.00020028   | 1.4279     | 0.212145   | carfem1 | carSet1 | carbam  | tarSet1 | carSet2    | 0.21214509   | Brush border |              |
| 8  | 1114  | 21339  | 3956269  | 1111   | 3937170     | 0.00000186  | 0.00021854   | 0.453184   | 0.234054   | carfem1 | carSet1 | carbam  | tarSet1 | carSet2    | 0.23405409   | Brush border |              |
| 9  | 517   | 1733   | 3307739  | 514    | 3300863     | 0.00000186  | 0.00046586   | 1.7429     | 0.212145   | carfem1 | carSet1 | carbam  | tarSet1 | carSet2    | 0.21214509   | Brush border |              |
| 10 | 2477  | 172433 | 2461     | 217449 | 0.00000073  | 0.00125493  | 1.38055      | 0.184519   | carfem1    | carSet1 | carbam  | tarSet1 | carSet2 | 0.18451909 | Brush border |              |              |
| 11 | 657   | 11231  | 279493   | 655    | 278420      | 0.00001564  | 0.00037504   | 0.588358   | 0.780848   | carfem1 | carSet1 | carbam  | tarSet1 | carSet2    | 0.78084809   | Brush border |              |
| 12 | 17027 | 17027  | 1669     | 1669   | 0.00002187  | 0.00017619  | 1.7027       | 1          | carfem1    | carSet1 | carbam  | tarSet1 | carSet2 | 0.70270000 | Brush border |              |              |
| 13 | 4621  | 26632  | 431796   | 4604   | 4291304     | 0.00100718  | 0.00068303   | 0.156466   | 0.029774   | carfem1 | carSet1 | carbam  | tarSet1 | carSet2    | 0.02977409   | Brush border |              |
| 14 | 838   | 78974  | 30003808 | 835    | 7877443     | 0.00000080  | 0.00021418   | 0.76231    | 0.824049   | carfem1 | carSet1 | carbam  | tarSet1 | carSet2    | 0.82404909   | Brush border |              |
| 15 | 1838  | 1838   | 293760   | 1834   | 2930766     | 0.00017547  | 0.00011312   | 0.807797   | 0.544905   | carfem1 | carSet1 | carbam  | tarSet1 | carSet2    | 0.54490504   | Brush border |              |
| 16 | 2794  | 18380  | 2794     | 2794   | 0.00011752  | 0.00133077  | 1.125766     | 0.145407   | carfem1    | carSet1 | carbam  | tarSet1 | carSet2 | 0.14540709 | Brush border |              |              |
| 17 | 1482  | 1482   | 211341   | 1472   | 211761      | 0.00064474  | 0.00076183   | 1.2942     | 0.613887   | carfem1 | carSet1 | carbam  | tarSet1 | carSet2    | 0.61388709   | Brush border |              |
| 18 | 1174  | 24102  | 4509393  | 1167   | 4508831     | 0.00012569  | 0.00029042   | 1.01874    | 0.84811    | carfem1 | carSet1 | carbam  | tarSet1 | carSet2    | 0.84811009   | Brush border |              |
| 19 | 2559  | 2559   | 605      | 605    | 0.43336E-05 | 0.00015649  | 1.53232E-05  | 0.438825   | 0.705021   | carfem1 | carSet1 | carbam  | tarSet1 | carSet2    | 0.70502109   | Brush border |              |
| 20 | 334   | 27883  | 482362   | 334    | 479579      | 6.3424E-05  | 0            | 0          | 0.77995    | carfem1 | carSet1 | carbam  | tarSet1 | carSet2    | 0.27429001   | Brush border |              |
| 21 | 2484  | 462699 | 124      | 462699 | 2.1478E-05  | 0           | 0            | 0          | 1          | carfem1 | carSet1 | carbam  | tarSet1 | carSet2    | 0.14288001   | Brush border |              |
| 22 | 975   | 23212  | 387100   | 973    | 387100      | 0.00021058  | 8.6223E-05   | 0.234422   | 0.141025   | carfem1 | carSet1 | carbam  | tarSet1 | carSet2    | 0.14128801   | Brush border |              |
| 23 | 249   | 20834  | 3589008  | 248    | 3589004     | 6.3981E-05  | 4.7924E-05   | 0.039365   | 1          | carfem1 | carSet1 | carbam  | tarSet1 | carSet2    | 0.35890001   | Brush border |              |
| 24 | 1326  | 1326   | 289649   | 1322   | 289649      | 0.00022124  | 0.00022321   | 1.217728   | 0.303756   | carfem1 | carSet1 | carbam  | tarSet1 | carSet2    | 0.30375609   | Brush border |              |
| 25 | 1933  | 32043  | 302672   | 1931   | 320617      | 0.00045388  | 0.00039209   | 0.71615    | 0.450033   | carfem1 | carSet1 | carbam  | tarSet1 | carSet2    | 0.45003309   | Brush border |              |
| 26 | 3689  | 3689   | 1954745  | 3685   | 3954745     | 0.00015227  | 0.00034027   | 0.810123   | 0.306358   | carfem1 | carSet1 | carbam  | tarSet1 | carSet2    | 0.30635809   | Brush border |              |
| 27 | 3613  | 26112  | 418935   | 3599   | 417283      | 0.00008466  | 0.00035152   | 0.421302   | 0.028205   | carfem1 | carSet1 | carbam  | tarSet1 | carSet2    | 0.02820509   | Brush border |              |
| 28 | 17307 | 17307  | 17307    | 17304  | 17307       | 0.00014672  | 0.00112322   | 1.20495    | 0.521883   | carfem1 | carSet1 | carbam  | tarSet1 | carSet2    | 0.52188309   | Brush border |              |
| 29 | 2052  | 14028  | 340785   | 2050   | 340785      | 0.00019313  | 0.00059651   | 1.16992    | 0.64751    | carfem1 | carSet1 | carbam  | tarSet1 | carSet2    | 0.64751009   | Brush border |              |
| 30 | 2549  | 12035  | 210372   | 2541   | 210372      | 0.00121784  | 0.00149558   | 1.23871    | 0.354941   | carfem1 | carSet1 | carbam  | tarSet1 | carSet2    | 0.35494109   | Brush border |              |
| 31 | 3278  | 18284  | 340929   | 3273   | 339049      | 0.00012928  | 0.00077221   | 1.76322    | 0.238413   | carfem1 | carSet1 | carbam  | tarSet1 | carSet2    | 0.23841309   | Brush border |              |
| 32 | 2818  | 2083   | 494381   | 2817   | 494381      | 0.00006936  | 0.00072556   | 1.205225   | 0.39073    | carfem1 | carSet1 | carbam  | tarSet1 | carSet2    | 0.39073009   | Brush border |              |
| 33 | 3817  | 291995 | 100      | 291995 | 0.00051939  | 0.00074711  | 1.70747      | 0.162725   | carfem1    | carSet1 | carbam  | tarSet1 | carSet2 | 0.16272509 | Brush border |              |              |
| 34 | 3763  | 384209 | 3763     | 384209 | 0.00000042  | 0.00078793  | 0.688697     | 0.161685   | carfem1    | carSet1 | carbam  | tarSet1 | carSet2 | 0.16168509 | Brush border |              |              |
| 35 | 335   | 27901  | 482399   | 332    | 479740      | 6.9424E-05  | 0.00070759   | 1.149779   | 0.452041   | carfem1 | carSet1 | carbam  | tarSet1 | carSet2    | 0.45204109   | Brush border |              |
| 36 | 2111  | 23996  | 523444   | 2107   | 523444      | 0           | 0            | 0          | 0.27277    | carfem1 | carSet1 | carbam  | tarSet1 | carSet2    | 0.27277009   | Brush border |              |
| 37 | 1164  | 29622  | 439490   | 1155   | 432577      | 0.00003817  | 0.00038037   | 1.42143    | 0.312715   | carfem1 | carSet1 | carbam  | tarSet1 | carSet2    | 0.31271509   | Brush border |              |
| 38 | 3826  | 45428  | 494945   | 3820   | 454281      | 0.00001783  | 1.5339E-05   | 0.44219    | 0.482123   | carfem1 | carSet1 | carbam  | tarSet1 | carSet2    | 0.48212309   | Brush border |              |
| 39 | 1391  | 20179  | 391718   | 1380   | 374507      | 0.00004245  | 0.00050934   | 0.562348   | 0.02587    | carfem1 | carSet1 | carbam  | tarSet1 | carSet2    | 0.02587009   | Brush border |              |
| 40 | 2050  | 1896   | 42062425 | 2046   | 42062425    | 0.00000224  | 0.00024539   | 0.497324   | 0.00000224 | carfem1 | carSet1 | carbam  | tarSet1 | carSet2    | 0.0000022409 | Brush border |              |
| 41 | 331   | 29988  | 531575   | 330    | 531587      | 6.5544E-05  | 1.34467E-05  | 0.058267   | 1          | carfem1 | carSet1 | carbam  | tarSet1 | carSet2    | 0.53157509   | Brush border |              |
| 42 | 1948  | 2628   | 569798   | 1937   | 569798      | 0.00004936  | 0.00073196   | 1.01917    | 0.752038   | carfem1 | carSet1 | carbam  | tarSet1 | carSet2    | 0.75203809   | Brush border |              |
| 43 | 2888  | 42499  | 48004793 | 2884   | 48004793    | 0.00000000  | 0.00019788   | 0.89654    | 0.882624   | carfem1 | carSet1 | carbam  | tarSet1 | carSet2    | 0.88262409   | Brush border |              |
| 44 | 3426  | 2067   | 381406   | 3413   | 381394      | 0.00009158  | 0.00062867   | 0.70374    | 0.241615   | carfem1 | carSet1 | carbam  | tarSet1 | carSet2    | 0.24161509   | Brush border |              |
| 45 | 3826  | 3826   | 388703   | 3820   | 388703      | 0.00012949  | 0.00012949   | 1.48658    | 0.3121     | carfem1 | carSet1 | carbam  | tarSet1 | carSet2    | 0.31210009   | Brush border |              |
| 46 | 2962  | 364397 | 364397   | 2958   | 364397      | 0.00005132  | 0.00029768   | 0.388933   | 0.370729   | carfem1 | carSet1 | carbam  | tarSet1 | carSet2    | 0.37072909   | Brush border |              |
| 47 | 1714  | 1714   | 1714     | 1714   | 0.00000000  | 0.00072589  | 1.00072589   | 1.00072589 | 0.00072589 | carfem1 | carSet1 | carbam  | tarSet1 | carSet2    | 0.0007258909 | Brush border |              |
| 48 | 1074  | 206750 | 1074     | 206750 | 0.00000289  | 0.00016519  | 0.891258     | 1          | carfem1    | carSet1 | carbam  | tarSet1 | carSet2 | 0.89125809 | Brush border |              |              |
| 49 | 1251  | 237897 | 1251     | 237897 | 0.00000338  | 0.00088187  | 1.232238     | 0.25958    | carfem1    | carSet1 | carbam  | tarSet1 | carSet2 | 0.25958009 | Brush border |              |              |
| 50 | 1007  | 1007   | 220381   | 1007   | 220381      | 0.00008906  | 0.00038828   | 0.27462    | 0.038828   | carfem1 | carSet1 | carbam  | tarSet1 | carSet2    | 0.03882809   | Brush border |              |
| 51 | 95    | 7007   | 148380   | 95     | 148380      | 6.1320E-05  | 0.00028549   | 0.38265    | 0.079058   | carfem1 | carSet1 | carbam  | tarSet1 | carSet2    | 0.07905809   | Brush border |              |
| 52 | 1007  | 1007   | 2705128  | 1007   | 2705128     | 0.00013566  | 0.00089929   | 0.71645    | 0.158813   | carfem1 | carSet1 | carbam  | tarSet1 | carSet2    | 0.15881309   | Brush border |              |
| 53 | 179   | 281929 | 179      | 281927 | 0.00011784  | 0.00011784  | 0.00011784   | 0.00011784 | 0.00011784 | carfem1 | carSet1 | carbam  | tarSet1 | carSet2    | 0.0001178409 | Brush border |              |
| 54 | 571   | 9239   | 199153   | 567    | 198184      | 0.00020269  | 0.00040321   | 1.20564    | 0.34666    | carfem1 | carSet1 | carbam  | tarSet1 | carSet2    | 0.34666009   | Brush border |              |
| 55 | 1297  | 1297   | 185619   | 1293   | 185619      | 0.00011845  | 0.00039351   | 1.0341     | 0.72809    | carfem1 | carSet1 | carbam  | tarSet1 | carSet2    | 0.72809009   | Brush border |              |
| 56 | 318   | 17349  | 153493   | 316    | 153493      | 0.00018345  | 0.00048082   | 1.29582    | 0.87001    | carfem1 | carSet1 | carbam  | tarSet1 | carSet2    | 0.87001009   | Brush border |              |
| 57 | 2212  | 10924  | 21995    | 2212   | 10924       | 0.00012045  | 0.00012045   | 1.04264    | 0.36026    | carfem1 | carSet1 | carbam  | tarSet1 | carSet2    | 0.36026009   | Brush border |              |
| 58 | 1998  | 11514  | 247121   | 1992   | 246697      | 0.00081872  | 0.00051215   | 1.6304     | 0.327366   | carfem1 | carSet1 | carbam  | tarSet1 | carSet2    | 0.32736609   | Brush border |              |
| 59 | 1472  | 14842  | 2021399  | 1472   | 2021399     | 0.00000000  | 0            | 0          | 0          | 0       | 0       | 0       | 0       | 0          | 0.14842009   | Brush border |              |
| 60 | 1622  | 19739  | 1615     | 19739  | 0.00017913  | 0.00115609  | 0.98189      | 0.00017913 | 0.00017913 | carfem1 | carSet1 | carbam  | tarSet1 | carSet2    | 0.0001791309 | Brush border |              |
| 61 | 867   | 3946   | 131527   | 864    | 130921      | 0.00009102  | 0.00050404   | 0.76382    | 0.00009102 | carfem1 | carSet1 | carbam  | tarSet1 | carSet2    | 0.0000910209 | Brush border |              |
| 62 | 1007  | 1007   | 1007     | 1007   | 0.00071814  | 0.00000000  | 0.00012244   | 0.247121   | 0.20207    | carfem1 | carSet1 | carbam  | tarSet1 | carSet2    | 0.24712109   | Brush border |              |
| 63 | 841   | 814    | 107825   | 840    | 107825      | 0.00004839  | 0.00012244   | 0.247121   | 0.20207    | carfem1 | carSet1 | carbam  | tarSet1 | carSet2    | 0.24712109   | Brush border |              |
| 64 | 1007  | 1007   | 2052198  | 1007   | 2052198     | 0.00000000  | 0.00015417   | 1.84858    | 0.3121     | carfem1 | carSet1 | carbam  | tarSet1 | carSet2    | 0.31210009   | Brush border |              |
| 65 | 179   | 10343  | 220627   | 178    | 220644      | 7.9118E-05  | 8.9502E-05   | 1.24515    | 0.53329    | carfem1 | carSet1 | carbam  | tarSet1 | carSet2    | 0.53329009   | Brush border |              |
| 66 | 1007  | 1007   | 202228   | 1007   | 202228      | 0.00000000  | 0.00012244   | 0.247121   | 0.20207    | carfem1 | carSet1 | carbam  | tarSet1 | carSet2    | 0.24712109   | Brush border |              |
| 67 | 34    | 10014  | 222599   | 34     | 222599      | 5.1574E-05  | 0            | 0          | 0          | 1       | carfem1 | carSet1 | carbam  | tarSet1    | carSet2      | 0.22259909   | Brush border |
| 68 | 225   | 202140 | 202140   | 225    | 202140      | 0.00007921  | 0.00027344   | 0.83838    | 0.00007921 | carfem1 | carSet1 | carbam  | tarSet1 | carSet2    | 0.0000792109 | Brush border |              |
| 69 | 1888  | 1842   | 877781   | 1882   | 877781      | 5.1720E-05  | 0.00018177   | 0.27124    | 0.8477     | carfem1 | carSet1 | carbam  | tarSet1 | carSet2    | 0.84770009   | Brush border |              |
| 70 | 1114  | 888    | 184170   | 1109   | 184170      | 0.00002811  | 0.00050281   | 0.19458    | 1          | carfem1 | carSet1 | carbam  | tarSet1 | carSet2    | 0.19458009   | Brush border |              |
| 71 | 1007  | 1007   | 211948   | 1007   |             |             |              |            |            |         |         |         |         |            |              |              |              |

|    |      |        |           |        |           |             |             |            |          |          |          |          |          |          |          |            |           |         |   |
|----|------|--------|-----------|--------|-----------|-------------|-------------|------------|----------|----------|----------|----------|----------|----------|----------|------------|-----------|---------|---|
| 4  | 533  | 9306   | 1978305   | 529    | 188999    | 0.002029423 | 0.004292813 | 1.595376   | 0.325687 | delNo2nd | chomNo1  | locuA01  | locuP01m | mydloc   | carfA02  | 1.83247931 | Bush      | border  |   |
| 4  | 750  | 2053   | 2093355   | 402    | 10024021  | 0.000300522 | 0.002030822 | 0.232028   | 0.173521 | delNo2nd | chomNo1  | locuA01  | locuP01m | mydloc   | carfA02  | 1.93702823 | Bush      | border  |   |
| 2  | 579  | 10294  | 232895    | 571    | 281801    | 0.000246675 | 0.000180278 | 0.730931   | 1.1      | Deluobio | deluobio | deluobio | deluobio | deluobio | deluobio | 1.79062441 | TarSert   | 1       |   |
| 2  | 657  | 11121  | 218429    | 655    | 212828    | 0.00025666  | 0.00019474  | 0.588358   | 0.78068  | Deluobio | Deluobio | Deluobio | Deluobio | Deluobio | Deluobio | 1.6497544  | carfA02   | 1       |   |
| 4  | 689  | 17     | 142327    | 57     | 4055178   | 0.00010138  | 0.000076    | 0.76417    | 0        | 1        | 1        | carfA01  | carfA01  | carfA01  | carfA01  | 0.73763083 | carfA01   | 1       |   |
| 3  | 949  | 8884   | 173242    | 946    | 1724078   | 0.000567775 | 0.000397324 | 0.533322   | 0.538194 | Deluobio | Deluobio | Deluobio | Deluobio | Deluobio | Deluobio | 1.6497544  | carfA02   | 1       |   |
| 4  | 103  | 143    | 129665    | 103    | 100033846 | 0.000139511 | 0.000039511 | 0.728629   | 1.1      | Deluobio | Deluobio | Deluobio | Deluobio | Deluobio | Deluobio | 1.6497544  | carfA02   | 1       |   |
| 3  | 170  | 1040   | 288124    | 167    | 287754    | 1.56115E-05 | 0.00012322  | 1.57862    | 0.554514 | Deluobio | Deluobio | Deluobio | Deluobio | Deluobio | Deluobio | 1.57228384 | carfA02   | 1       |   |
| 4  | 296  | 1911   | 296195    | 296    | 191131    | 0.000104945 | 0.00007111  | 0.730931   | 1.1      | Deluobio | Deluobio | Deluobio | Deluobio | Deluobio | Deluobio | 1.6497544  | carfA02   | 1       |   |
| 2  | 168  | 422    | 92526     | 166    | 925067    | 0.000116167 | 0.000042    | 2.54824    | 0.188386 | Deluobio | Deluobio | Deluobio | Deluobio | Deluobio | Deluobio | 1.81635792 | carfA02   | 1       |   |
| 2  | 161  | 7299   | 158885    | 609    | 1943542   | 0.00030455  | 0.00027401  | 0.712549   | 1        | Deluobio | Deluobio | Deluobio | Deluobio | Deluobio | Deluobio | 1.6497544  | carfA02   | 1       |   |
| 4  | 693  | 7433   | 193101    | 689    | 1884642   | 0.00023348  | 0.00016205  | 0.730931   | 1.1      | Deluobio | Deluobio | Deluobio | Deluobio | Deluobio | Deluobio | 1.6497544  | carfA02   | 1       |   |
| 10 | 1018 | 10004  | 213188    | 1008   | 2123877   | 0.00047005  | 0.00034078  | 1.04888    | 0.674577 | Deluobio | Deluobio | Deluobio | Deluobio | Deluobio | Deluobio | 1.6497544  | carfA02   | 1       |   |
| 4  | 104  | 1683   | 145208393 | 104    | 16830445  | 0.000100483 | 0.000032963 | 0.611661   | 0.177865 | Deluobio | Deluobio | Deluobio | Deluobio | Deluobio | Deluobio | 1.77321073 | carfA02   | 1       |   |
| 4  | 364  | 1043   | 238742    | 364    | 238740    | 0.00010404  | 0.00003404  | 0.730931   | 1.1      | Deluobio | Deluobio | Deluobio | Deluobio | Deluobio | Deluobio | 1.6497544  | carfA02   | 1       |   |
| 4  | 104  | 8839   | 1600206   | 104    | 1611338   | 0.00012708  | 0.00007628  | 0.730931   | 1.1      | Deluobio | Deluobio | Deluobio | Deluobio | Deluobio | Deluobio | 1.6497544  | carfA02   | 1       |   |
| 4  | 605  | 118989 | 290913    | 605    | 118983    | 0.00047269  | 0.00031033  | 1.04888    | 0.674577 | Deluobio | Deluobio | Deluobio | Deluobio | Deluobio | Deluobio | 1.6497544  | carfA02   | 1       |   |
| 4  | 878  | 136428 | 878       | 136428 | 878       | 136428      | 0.00047269  | 0.00031033 | 1.04888  | 0.674577 | Deluobio | Deluobio | Deluobio | Deluobio | Deluobio | 1.6497544  | carfA02   | 1       |   |
| 4  | 1296 | 1594   | 245828    | 1296   | 245828    | 0.00017815  | 0.00012524  | 0.650044   | 0.377553 | Deluobio | Deluobio | Deluobio | Deluobio | Deluobio | Deluobio | 1.6497544  | carfA02   | 1       |   |
| 4  | 356  | 8632   | 162135    | 356    | 162135    | 0.00021077  | 0.00014883  | 0.730931   | 1.1      | Deluobio | Deluobio | Deluobio | Deluobio | Deluobio | Deluobio | 1.6497544  | carfA02   | 1       |   |
| 4  | 334  | 295595 | 334       | 295595 | 334       | 295595      | 0.00012642  | 0.00008752 | 0.620251 | Deluobio | Deluobio | Deluobio | Deluobio | Deluobio | Deluobio | 1.6497544  | carfA02   | 1       |   |
| 4  | 87   | 10796  | 218477    | 87     | 218771    | 0.00021077  | 0.00014883  | 0.730931   | 1.1      | Deluobio | Deluobio | Deluobio | Deluobio | Deluobio | Deluobio | 1.6497544  | carfA02   | 1       |   |
| 4  | 80   | 12167  | 202789    | 80     | 221520    | 0.00012642  | 0.00008752  | 0.620251   | 0.377553 | Deluobio | Deluobio | Deluobio | Deluobio | Deluobio | Deluobio | 1.6497544  | carfA02   | 1       |   |
| 4  | 18   | 10276  | 224294    | 18     | 224294    | 8.13888E-06 | 0.00001517  | 0.730931   | 1.1      | Deluobio | Deluobio | Deluobio | Deluobio | Deluobio | Deluobio | 1.6497544  | carfA02   | 1       |   |
| 4  | 187  | 130647 | 187       | 130647 | 187       | 130647      | 0.00013137  | 0.00009417 | 0.730931 | 1.1      | Deluobio | Deluobio | Deluobio | Deluobio | Deluobio | Deluobio   | 1.6497544 | carfA02 | 1 |
| 4  | 107  | 1908   | 162195    | 107    | 162195    | 0.00013137  | 0.00009417  | 0.730931   | 1.1      | Deluobio | Deluobio | Deluobio | Deluobio | Deluobio | Deluobio | 1.6497544  | carfA02   | 1       |   |
| 2  | 382  | 18737  | 174509    | 380    | 178932    | 0.00012642  | 0.00008752  | 0.620251   | 0.377553 | Deluobio | Deluobio | Deluobio | Deluobio | Deluobio | Deluobio | 1.6497544  | carfA02   | 1       |   |
| 4  | 860  | 10810  | 208171    | 860    | 207785    | 0.00012642  | 0.00008752  | 0.620251   | 0.377553 | Deluobio | Deluobio | Deluobio | Deluobio | Deluobio | Deluobio | 1.6497544  | carfA02   | 1       |   |
| 4  | 369  | 21748  | 236668    | 366    | 236608    | 0.00012642  | 0.00008752  | 0.620251   | 0.377553 | Deluobio | Deluobio | Deluobio | Deluobio | Deluobio | Deluobio | 1.6497544  | carfA02   | 1       |   |
| 1  | 423  | 17684  | 17684     | 423    | 172888    | 0.00012642  | 0.00008752  | 0.620251   | 0.377553 | Deluobio | Deluobio | Deluobio | Deluobio | Deluobio | Deluobio | 1.6497544  | carfA02   | 1       |   |
| 4  | 240  | 8840   | 165986    | 240    | 165986    | 0.00013137  | 0.00009417  | 0.730931   | 1.1      | Deluobio | Deluobio | Deluobio | Deluobio | Deluobio | Deluobio | 1.6497544  | carfA02   | 1       |   |
| 4  | 167  | 19784  | 19784     | 167    | 199997    | 0.00012642  | 0.00008752  | 0.620251   | 0.377553 | Deluobio | Deluobio | Deluobio | Deluobio | Deluobio | Deluobio | 1.6497544  | carfA02   | 1       |   |
| 2  | 773  | 18075  | 178071    | 771    | 177521    | 0.00014009  | 0.000102345 | 0.538342   | 0.597461 | Deluobio | Deluobio | Deluobio | Deluobio | Deluobio | Deluobio | 1.9576638  | carfA02   | 1       |   |
| 3  | 612  | 11850  | 221370    | 609    | 220980    | 0.00027427  | 0.00020322  | 0.533934   | 0.587011 | Deluobio | Deluobio | Deluobio | Deluobio | Deluobio | Deluobio | 1.9576638  | carfA02   | 1       |   |
| 4  | 127  | 16135  | 16135     | 127    | 166505    | 0.00027427  | 0.00020322  | 0.533934   | 0.587011 | Deluobio | Deluobio | Deluobio | Deluobio | Deluobio | Deluobio | 1.9576638  | carfA02   | 1       |   |
| 4  | 75   | 11265  | 224294    | 73     | 223255    | 3.37318E-05 | 0.00017754  | 1.26331    | 0.078088 | Deluobio | Deluobio | Deluobio | Deluobio | Deluobio | Deluobio | 1.05588883 | carfA02   | 1       |   |
| 4  | 68   | 11927  | 224294    | 68     | 224294    | 4.42786E-05 | 0.00017754  | 1.26331    | 0.078088 | Deluobio | Deluobio | Deluobio | Deluobio | Deluobio | Deluobio | 1.05588883 | carfA02   | 1       |   |
| 4  | 330  | 10128  | 204425    | 336    | 204547    | 0.00013137  | 0.00009417  | 0.730931   | 1.1      | Deluobio | Deluobio | Deluobio | Deluobio | Deluobio | Deluobio | 1.6497544  | carfA02   | 1       |   |
| 4  | 118  | 1040   | 204425    | 118    | 204425    | 0.00013137  | 0.00009417  | 0.730931   | 1.1      | Deluobio | Deluobio | Deluobio | Deluobio | Deluobio | Deluobio | 1.6497544  | carfA02   | 1       |   |
| 2  | 781  | 9214   | 185029    | 779    | 184835    | 0.00041018  | 0.00030455  | 1.04888    | 0.674577 | Deluobio | Deluobio | Deluobio | Deluobio | Deluobio | Deluobio | 1.6497544  | carfA02   | 1       |   |
| 2  | 813  | 11487  | 221570    | 811    | 221024    | 0.00012642  | 0.00008752  | 0.620251   | 0.377553 | Deluobio | Deluobio | Deluobio | Deluobio | Deluobio | Deluobio | 1.6497544  | carfA02   | 1       |   |
| 2  | 812  | 11790  | 288878    | 812    | 278429    | 2.30021E-02 | 0.00012642  | 0.620251   | 0.377553 | Deluobio | Deluobio | Deluobio | Deluobio | Deluobio | Deluobio | 1.6497544  | carfA02   | 1       |   |
| 3  | 448  | 18785  | 282227    | 448    | 282844    | 0.00012642  | 0.00008752  | 0.620251   | 0.377553 | Deluobio | Deluobio | Deluobio | Deluobio | Deluobio | Deluobio | 1.6497544  | carfA02   | 1       |   |
| 4  | 121  | 12105  | 12105     | 121    | 12105     | 0.00012642  | 0.00008752  | 0.620251   | 0.377553 | Deluobio | Deluobio | Deluobio | Deluobio | Deluobio | Deluobio | 1.6497544  | carfA02   | 1       |   |
| 4  | 830  | 150873 | 830       | 150873 | 830       | 150873      | 0.00012642  | 0.00008752 | 0.620251 | 0.377553 | Deluobio | Deluobio | Deluobio | Deluobio | Deluobio | 1.6497544  | carfA02   | 1       |   |
| 4  | 167  | 1908   | 202733    | 167    | 1908      | 0.00012642  | 0.00008752  | 0.620251   | 0.377553 | Deluobio | Deluobio | Deluobio | Deluobio | Deluobio | Deluobio | 1.6497544  | carfA02   | 1       |   |
| 5  | 1206 | 9047   | 159467    | 1201   | 164132    | 0.00012642  | 0.00008752  | 0.620251   | 0.377553 | Deluobio | Deluobio | Deluobio | Deluobio | Deluobio | Deluobio | 1.6497544  | carfA02   | 1       |   |
| 12 | 1199 | 10733  | 209472    | 1187   | 208429    | 0.00012642  | 0.00008752  | 0.620251   | 0.377553 | Deluobio | Deluobio | Deluobio | Deluobio | Deluobio | Deluobio | 1.6497544  | carfA02   | 1       |   |
| 4  | 1216 | 13126  | 13126     | 1216   | 130251    | 0.00012642  | 0.00008752  | 0.620251   | 0.377553 | Deluobio | Deluobio | Deluobio | Deluobio | Deluobio | Deluobio | 1.6497544  | carfA02   | 1       |   |
| 3  | 507  | 9917   | 204790    | 504    | 203873    | 0.00012642  | 0.00008752  | 0.620251   | 0.377553 | Deluobio | Deluobio | Deluobio | Deluobio | Deluobio | Deluobio | 1.6497544  | carfA02   | 1       |   |
| 4  | 107  | 1908   | 1908      | 107    | 1908      | 0.00012642  | 0.00008752  | 0.620251   | 0.377553 | Deluobio | Deluobio | Deluobio | Deluobio | Deluobio | Deluobio | 1.6497544  | carfA02   | 1       |   |
| 2  | 183  | 21769  | 157609    | 181    | 156280    | 0.00013137  | 0.00009417  | 0.730931   | 1.1      | Deluobio | Deluobio | Deluobio | Deluobio | Deluobio | Deluobio | 1.6497544  | carfA02   | 1       |   |
| 22 | 4321 | 18198  | 340779    | 4309   | 338997    | 0.00012642  | 0.00008752  | 0.620251   | 0.377553 | Deluobio | Deluobio | Deluobio | Deluobio | Deluobio | Deluobio | 1.6497544  | carfA02   | 1       |   |
| 20 | 3255 | 42954  | 996827    | 3247   | 996827    | 0.00012642  | 0.00008752  | 0.620251   | 0.377553 | Deluobio | Deluobio | Deluobio | Deluobio | Deluobio | Deluobio | 1.6497544  | carfA02   | 1       |   |
| 17 | 2612 | 10617  | 491304    | 2608   | 491304    | 0.00012642  | 0.00008752  | 0.620251   | 0.377553 | Deluobio | Deluobio | Deluobio | Deluobio | Deluobio | Deluobio | 1.6497544  | carfA02   | 1       |   |
| 17 | 2212 | 12192  | 219012    | 2212   | 219012    | 0.00012642  | 0.00008752  | 0.620251   | 0.377553 | Deluobio | Deluobio | Deluobio | Deluobio | Deluobio | Deluobio | 1.6497544  | carfA02   | 1       |   |
| 7  | 932  | 30183  | 518805    | 925    | 513738    | 0.00013137  | 0.00009417  | 0.730931   | 1.1      | Deluobio | Deluobio | Deluobio | Deluobio | Deluobio | Deluobio | 1.6497544  | carfA02   | 1       |   |
| 9  | 2495 | 14617  | 272724    | 2491   | 272724    | 0.00012642  | 0.00008752  | 0.620251   | 0.377553 | Deluobio | Deluobio | Deluobio | Deluobio | Deluobio | Deluobio | 1.6497544  | carfA02   | 1       |   |
| 9  | 909  | 10118  | 155158    | 900    | 154970    | 0.00012642  | 0.00008752  | 0.620251   | 0.377553 | Deluobio | Deluobio | Deluobio | Deluobio | Deluobio | Deluobio | 1.6497544  | carfA02   | 1       |   |
| 18 | 3500 | 12086  | 266375    | 3482   | 265375    | 0.00012642  | 0.00008752  | 0.620251   | 0.377553 | Deluobio | Deluobio | Deluobio | Deluobio | Deluobio | Deluobio | 1.6497544  | carfA02   | 1       |   |
| 13 | 2018 | 10184  | 212877    | 2017   | 212877    | 0.00012642  | 0.00008752  | 0.620251   | 0.377553 | Deluobio | Deluobio | Deluobio | Deluobio | Deluobio | Deluobio | 1.6497544  | carfA02   | 1       |   |
| 15 | 5066 | 25435  | 5066      | 25435  | 5066      | 0.00012642  | 0.00008752  | 0.620251   | 0.377553 | Deluobio | Deluobio | Deluobio | Deluobio | Deluobio | Deluobio | 1.6497544  | carfA02   | 1       |   |
| 15 | 5066 | 25435  | 5066      | 25435  | 5066      | 0.00012642  | 0.00008752  |            |          |          |          |          |          |          |          |            |           |         |   |





|    |      |       |        |      |        |            |             |         |             |             |             |          |          |        |           |             |             |             |
|----|------|-------|--------|------|--------|------------|-------------|---------|-------------|-------------|-------------|----------|----------|--------|-----------|-------------|-------------|-------------|
| 1  | 975  | 2512  | 386420 | 973  | 387200 | 0.00020388 | 6.85623E-05 | 0.34542 | 0.14055     | Lepidoptera | miMura      | Protopse | facialis | caerul | euCa2     | 0.1425843   | Bush border |             |
| 2  | 1202 | 1929  | 28212  | 68   | 219078 | 0.00021428 | 7.7814E-05  | 0.57079 | 0.21646     | Lepidoptera | miMura      | Protopse | caurivis | caerul | euCa1     | 0.1212121   | Bush border |             |
| 3  | 1461 | 1580  | 290213 | 162  | 207683 | 0.00048627 | 0.0008576   | 1.19474 | 0.57902     | Lepidoptera | miMura      | Protopse | caerul   | caerul | euCa1     | 0.1579676   | Bush border |             |
| 4  | 535  | 202   | 202409 | 523  | 220201 | 0.00021428 | 0.0002734   | 0.08638 | 1           | Lepidoptera | miMura      | Protopse | caerul   | caerul | euCa1     | 0.1         | Bush border |             |
| 5  | 402  | 402   | 402700 | 405  | 413824 | 0          | 0           | 0       | 0           | 0           | 0           | 0        | 0        | 0      | 0         | 0           | 0           |             |
| 6  | 394  | 2007  | 340700 | 391  | 347083 | 0.0001237  | 0.0004949   | 1.32429 | 0.48704     | Lepidoptera | miMura      | Protopse | caerul   | caerul | euCa1     | 0.1489013   | Bush border |             |
| 7  | 484  | 484   | 484700 | 482  | 484700 | 0.00020388 | 0.00020388  | 0.20037 | 0.1227      | Lepidoptera | miMura      | Protopse | caerul   | caerul | euCa1     | 0.1202020   | Bush border |             |
| 8  | 741  | 2418  | 241813 | 737  | 246435 | 0.0001748  | 0.0003557   | 0.58467 | Lepidoptera | miMura      | Protopse    | caerul   | caerul   | euCa1  | 0.1489013 | Bush border |             |             |
| 9  | 1461 | 1580  | 290213 | 1461 | 290213 | 0.00020388 | 0.00020388  | 0.20037 | 0.1227      | Lepidoptera | miMura      | Protopse | caerul   | caerul | euCa1     | 0.1202020   | Bush border |             |
| 10 | 9401 | 12367 | 379257 | 1392 | 379200 | 0.0001748  | 0.0003557   | 0.58467 | Lepidoptera | miMura      | Protopse    | caerul   | caerul   | euCa1  | 0.1489013 | Bush border |             |             |
| 11 | 992  | 2193  | 219317 | 989  | 220324 | 0.0004390  | 0.0002110   | 0.10257 | 0.32029     | Lepidoptera | miMura      | Protopse | caerul   | caerul | euCa1     | 0.1502044   | Bush border |             |
| 12 | 1217 | 40270 | 402700 | 1217 | 402700 | 0.00021428 | 0.0004222   | 1.36864 | 0.14787     | Lepidoptera | miMura      | Protopse | caerul   | caerul | euCa1     | 0.1502044   | Bush border |             |
| 13 | 74   | 1796  | 280977 | 74   | 287191 | 2.5607E-05 | 0           | 0       | 0           | 1           | Lepidoptera | miMura   | Protopse | caerul | caerul    | euCa1       | 0.1         | Bush border |
| 14 | 1347 | 1347  | 134700 | 82   | 140717 | 0.0003875  | 0.0003077   | 0.18848 | 0.0003875   | Lepidoptera | miMura      | Protopse | caerul   | caerul | euCa1     | 0.1         | Bush border |             |
| 15 | 938  | 2310  | 231000 | 939  | 230950 | 0.0004020  | 0.0003861   | 1.40748 | 0.13914     | Lepidoptera | miMura      | Protopse | caerul   | caerul | euCa1     | 0.1379240   | Bush border |             |
| 16 | 482  | 1770  | 291796 | 479  | 291796 | 0.0001547  | 0.0002266   | 0.39083 | 0.04607     | Lepidoptera | miMura      | Protopse | caerul   | caerul | euCa1     | 0.1422020   | Bush border |             |
| 17 | 482  | 1770  | 291796 | 479  | 291796 | 0.0001547  | 0.0002266   | 0.39083 | 0.04607     | Lepidoptera | miMura      | Protopse | caerul   | caerul | euCa1     | 0.1422020   | Bush border |             |
| 18 | 149  | 2142  | 415428 | 148  | 402837 | 0.0001916  | 0.0004832   | 0.51287 | 0.04124     | Lepidoptera | miMura      | Protopse | caerul   | caerul | euCa1     | 0.1504924   | Bush border |             |
| 19 | 120  | 2396  | 412976 | 129  | 412976 | 0.0001916  | 0.0004832   | 0.51287 | 0.04124     | Lepidoptera | miMura      | Protopse | caerul   | caerul | euCa1     | 0.1504924   | Bush border |             |
| 20 | 30   | 2548  | 402589 | 30   | 398821 | 7.4796E-06 | 0           | 0       | 0           | 1           | Lepidoptera | miMura   | Protopse | caerul | caerul    | euCa1       | 0.1         | Bush border |
| 21 | 245  | 21264 | 212640 | 244  | 212544 | 0.0001428  | 8.846E-05   | 0.77408 | 0           | 0           | 0           | 0        | 0        | 0      | 0         | 0           | 0           |             |
| 22 | 640  | 17399 | 613668 | 633  | 610629 | 0.0002487  | 0.0004022   | 1.26325 | 0.09889     | Lepidoptera | miMura      | Protopse | caerul   | caerul | euCa1     | 0.1097817   | Bush border |             |
| 23 | 640  | 17399 | 613668 | 633  | 610629 | 0.0002487  | 0.0004022   | 1.26325 | 0.09889     | Lepidoptera | miMura      | Protopse | caerul   | caerul | euCa1     | 0.1097817   | Bush border |             |
| 24 | 640  | 17399 | 613668 | 633  | 610629 | 0.0002487  | 0.0004022   | 1.26325 | 0.09889     | Lepidoptera | miMura      | Protopse | caerul   | caerul | euCa1     | 0.1097817   | Bush border |             |
| 25 | 1220 | 2829  | 368798 | 1216 | 369298 | 0.00021428 | 0.0002249   | 0.10413 | 0.78814     | Lepidoptera | miMura      | Protopse | caerul   | caerul | euCa1     | 0.7882020   | Bush border |             |
| 26 | 556  | 2648  | 385403 | 552  | 383043 | 0.0001748  | 0.0001758   | 0.32904 | 0.26885     | Lepidoptera | miMura      | Protopse | caerul   | caerul | euCa1     | 0.1287602   | Bush border |             |
| 27 | 611  | 15627 | 156270 | 607  | 151017 | 0.0001428  | 0.0001718   | 1.18832 | 0.5848      | Lepidoptera | miMura      | Protopse | caerul   | caerul | euCa1     | 0.1584386   | Bush border |             |
| 28 | 3    | 350   | 17860  | 347  | 278429 | 0.0001462  | 0.0001781   | 1.18859 | 0.48324     | Lepidoptera | miMura      | Protopse | caerul   | caerul | euCa1     | 0.1482179   | Bush border |             |
| 29 | 1116 | 1846  | 387246 | 1112 | 387286 | 0.00020388 | 0.0001865   | 0.56861 | 0.16128     | Lepidoptera | miMura      | Protopse | caerul   | caerul | euCa1     | 0.1422020   | Bush border |             |
| 30 | 1116 | 1846  | 387246 | 1112 | 387286 | 0.00020388 | 0.0001865   | 0.56861 | 0.16128     | Lepidoptera | miMura      | Protopse | caerul   | caerul | euCa1     | 0.1422020   | Bush border |             |
| 31 | 7    | 1152  | 303511 | 7    | 312646 | 0.0001916  | 0.0004866   | 1.14702 | 0.61127     | Lepidoptera | miMura      | Protopse | caerul   | caerul | euCa1     | 0.1489013   | Bush border |             |
| 32 | 885  | 2263  | 387407 | 879  | 381404 | 0.0002844  | 0.0002627   | 1.16998 | 0.05578     | Lepidoptera | miMura      | Protopse | caerul   | caerul | euCa1     | 0.1645081   | Bush border |             |
| 33 | 140  | 2456  | 474064 | 140  | 474064 | 2.3938E-05 | 0           | 0       | 0           | 1           | Lepidoptera | miMura   | Protopse | caerul | caerul    | euCa1       | 0.1         | Bush border |
| 34 | 7    | 415   | 20081  | 7    | 415000 | 0.0001428  | 0           | 0       | 0           | 1           | Lepidoptera | miMura   | Protopse | caerul | caerul    | euCa1       | 0.1         | Bush border |
| 35 | 7    | 415   | 20081  | 7    | 415000 | 0.0001428  | 0           | 0       | 0           | 1           | Lepidoptera | miMura   | Protopse | caerul | caerul    | euCa1       | 0.1         | Bush border |
| 36 | 238  | 2007  | 396821 | 236  | 398830 | 0.0001428  | 0.0004868   | 1.17824 | 0.00782     | Lepidoptera | miMura      | Protopse | caerul   | caerul | euCa1     | 0.0071834   | Bush border |             |
| 37 | 1159 | 1746  | 398830 | 1159 | 398830 | 0.0001428  | 0.0004868   | 1.17824 | 0.00782     | Lepidoptera | miMura      | Protopse | caerul   | caerul | euCa1     | 0.0071834   | Bush border |             |
| 38 | 1218 | 2293  | 380210 | 1210 | 381794 | 0.0001547  | 0.0005888   | 1.18664 | 0.70201     | Lepidoptera | miMura      | Protopse | caerul   | caerul | euCa1     | 0.7020079   | Bush border |             |
| 39 | 432  | 432   | 432700 | 432  | 432700 | 0          | 0           | 0       | 0           | 1           | Lepidoptera | miMura   | Protopse | caerul | caerul    | euCa1       | 0.1         | Bush border |
| 40 | 653  | 2286  | 500478 | 649  | 499885 | 0.0001748  | 0.0005888   | 1.18664 | 0.70201     | Lepidoptera | miMura      | Protopse | caerul   | caerul | euCa1     | 0.7020079   | Bush border |             |
| 41 | 513  | 2007  | 340700 | 513  | 340700 | 0.0001748  | 0.0005888   | 1.18664 | 0.70201     | Lepidoptera | miMura      | Protopse | caerul   | caerul | euCa1     | 0.7020079   | Bush border |             |
| 42 | 1248 | 1248  | 124800 | 1236 | 125071 | 0.0004473  | 0.0001916   | 0.56861 | 0.16128     | Lepidoptera | miMura      | Protopse | caerul   | caerul | euCa1     | 0.1422020   | Bush border |             |
| 43 | 6061 | 1708  | 342524 | 6055 | 339486 | 0.0003907  | 0.0003573   | 1.12802 | 0.62472     | Lepidoptera | miMura      | Protopse | caerul   | caerul | euCa1     | 0.1642246   | Bush border |             |
| 44 | 1054 | 19004 | 190040 | 1054 | 190040 | 0.00020388 | 0.00020388  | 0.20037 | 0.1227      | Lepidoptera | miMura      | Protopse | caerul   | caerul | euCa1     | 0.1202020   | Bush border |             |
| 45 | 636  | 2479  | 402739 | 634  | 402739 | 0.0001748  | 0.0008006   | 0.51168 | 0.02933     | Lepidoptera | miMura      | Protopse | caerul   | caerul | euCa1     | 0.1603307   | Bush border |             |
| 46 | 61   | 1024  | 102400 | 61   | 102400 | 0.0001748  | 0.0008006   | 0.51168 | 0.02933     | Lepidoptera | miMura      | Protopse | caerul   | caerul | euCa1     | 0.1603307   | Bush border |             |
| 47 | 661  | 1827  | 251405 | 661  | 250790 | 0.0002127  | 0.0001718   | 1.18832 | 0.5848      | Lepidoptera | miMura      | Protopse | caerul   | caerul | euCa1     | 0.1584386   | Bush border |             |
| 48 | 1024 | 1024  | 102400 | 1024 | 102400 | 0.0001748  | 0.0001718   | 1.18832 | 0.5848      | Lepidoptera | miMura      | Protopse | caerul   | caerul | euCa1     | 0.1584386   | Bush border |             |
| 49 | 2004 | 1578  | 291518 | 1996 | 291627 | 0.0004390  | 0.0002079   | 0.77093 | 0.67483     | Lepidoptera | miMura      | Protopse | caerul   | caerul | euCa1     | 0.6748300   | Bush border |             |
| 50 | 1422 | 1845  | 339878 | 1419 | 338231 | 0.0001865  | 0.0001790   | 0.42505 | 0.19664     | Lepidoptera | miMura      | Protopse | caerul   | caerul | euCa1     | 0.1379240   | Bush border |             |
| 51 | 2003 | 2003  | 200300 | 2003 | 200300 | 0.0001865  | 0.0002009   | 0.71413 | 0.40023     | Lepidoptera | miMura      | Protopse | caerul   | caerul | euCa1     | 0.4002300   | Bush border |             |
| 52 | 127  | 1578  | 220000 | 127  | 219487 | 5.7568E-05 | 0           | 0       | 0           | 1           | Lepidoptera | miMura   | Protopse | caerul | caerul    | euCa1       | 0.1         | Bush border |
| 53 | 2147 | 2147  | 214700 | 2147 | 214700 | 0.0001428  | 0.0011231   | 0.31366 | 0.17635     | Lepidoptera | miMura      | Protopse | caerul   | caerul | euCa1     | 0.1763500   | Bush border |             |
| 54 | 2    | 483   | 483071 | 2    | 483071 | 0.0001211  | 0.0001211   | 0.31366 | 0.17635     | Lepidoptera | miMura      | Protopse | caerul   | caerul | euCa1     | 0.1763500   | Bush border |             |
| 55 | 849  | 1917  | 307586 | 844  | 303829 | 0.0002708  | 0.0001748   | 1.19474 | 0.09994     | Lepidoptera | miMura      | Protopse | caerul   | caerul | euCa1     | 0.1821807   | Bush border |             |
| 56 | 1054 | 1054  | 105400 | 1054 | 105400 | 0.0002708  | 0.0001748   | 1.19474 | 0.09994     | Lepidoptera | miMura      | Protopse | caerul   | caerul | euCa1     | 0.1821807   | Bush border |             |
| 57 | 433  | 1343  | 237916 | 432  | 236985 | 0.0001203  | 0.0001203   | 0.43736 | 0.57305     | Lepidoptera | miMura      | Protopse | caerul   | caerul | euCa1     | 0.7392745   | Bush border |             |
| 58 | 2030 | 2030  | 203000 | 2030 | 203000 | 0.0001203  | 0.0004703   | 0.51838 | 0.08864     | Lepidoptera | miMura      | Protopse | caerul   | caerul | euCa1     | 0.0886400   | Bush border |             |
| 59 | 127  | 2014  | 374431 | 127  | 373209 | 0.0001748  | 0.0005888   | 1.18664 | 0.70201     | Lepidoptera | miMura      | Protopse | caerul   | caerul | euCa1     | 0.7020079   | Bush border |             |
| 60 | 344  | 1645  | 264500 | 344  | 264500 | 0.0001748  | 0.0005888   | 1.18664 | 0.70201     | Lepidoptera | miMura      | Protopse | caerul   | caerul | euCa1     | 0.7020079   | Bush border |             |
| 61 | 1727 | 10675 | 106750 | 1718 | 106875 | 0.0001748  | 0.0004868   | 1.17824 | 0.00782     | Lepidoptera | miMura      | Protopse | caerul   | caerul | euCa1     | 0.0071834   | Bush border |             |
| 62 | 1003 | 1003  | 100300 | 1003 | 100300 | 0.0001748  | 0.0004868   | 1.17824 | 0.00782     | Lepidoptera | miMura      | Protopse | caerul   | caerul | euCa1     | 0.0071834   | Bush border |             |
| 63 | 1003 | 1003  | 100300 | 1003 | 100300 | 0.0001748  | 0.0004868   | 1.17824 | 0.00782     | Lepidoptera | miMura      | Protopse | caerul   | caerul | euCa1     | 0.0071834   | Bush border |             |
| 64 | 1185 | 1674  | 264739 | 1179 | 264303 | 0.0004759  | 0.0004009   | 0.81241 | 0.79609     | Lepidoptera | miMura      | Protopse | caerul   | caerul | euCa1     | 0.7960900   | Bush border |             |
| 65 | 1185 | 1674  | 264739 | 1179 | 264303 | 0.0004759  | 0.0004009   | 0.81241 | 0.79609     | Lepidoptera | miMura      | Protopse | caerul   | caerul | euCa1     | 0.7960900   | Bush border |             |
| 66 | 1185 | 1674  | 264739 | 1179 | 264303 | 0.0004759  | 0.0004009   | 0.81241 | 0.79609     | Lepidoptera | miMura      | Protopse | caerul   | caerul | euCa1     | 0.7960900   | Bush border |             |
| 67 | 1185 | 1674  | 264739 | 1179 | 264303 | 0.0004759  | 0.0004009   | 0.81241 | 0.79609     | Lepidoptera | miMura      | Protopse | caerul   | caerul | euCa1     | 0.7960900   | Bush border |             |
| 68 | 247  | 1871  | 306396 | 246  | 305255 | 0.0001748  | 0           | 0       | 0           | 1           | Lepidoptera | miMura   | Protopse | caerul | caerul    | euCa1       | 0.1         | Bush border |
| 69 | 207  | 207   | 207000 | 207  | 207000 | 0.0001748  | 0           | 0       | 0           | 1           | Lepidoptera | miMura   | Protopse | caerul | caerul    | euCa1       | 0.1         | Bush border |
| 70 | 16   | 1811  | 356461 | 16   | 356461 | 5.7568E-05 | 0           | 0       | 0           | 1           | Lepidoptera | miMura   | Protopse | caerul | caerul    |             |             |             |

|    |      |       |          |      |          |            |            |          |          |    |    |       |         |       |       |           |              |
|----|------|-------|----------|------|----------|------------|------------|----------|----------|----|----|-------|---------|-------|-------|-----------|--------------|
| 9  | 1150 | 20259 | 400499   | 1183 | 407140   | 0.00029098 | 0.00042717 | 1.470151 | 0.22358  | mm | rd | du0r1 | calcat  | panT2 | tarT1 | 0.2718886 | Brush border |
| 2  | 1217 | 20260 | 440199   | 1184 | 407141   | 0.00029102 | 0.00042721 | 1.470151 | 0.22358  | mm | rd | du0r1 | calcat  | panT2 | tarT1 | 0.2718886 | Brush border |
| 5  | 946  | 1016  | 224473   | 941  | 273437   | 0.00045269 | 0.00064835 | 1.067289 | 0.81433  | mm | rd | du0r1 | chm04   | d4m20 | zncA1 | 0.8142874 | Brush border |
| 2  | 441  | 3017  | 530970   | 439  | 530927   | 0.8424825  | 0.8424825  | 0.70734  | 1        | mm | rd | du0r1 | colobae | panT2 | panT2 | 0.70734   | Brush border |
| 1  | 3192 | 13192 | 37981    | 3183 | 377829   | 0.00021389 | 0.00021389 | 0.128122 | 0.277795 | mm | rd | du0r1 | colobae | panT2 | panT2 | 0.277795  | Brush border |
| 2  | 347  | 1817  | 150676   | 345  | 150745   | 0.00021392 | 0.00021392 | 0.128122 | 0.277795 | mm | rd | du0r1 | colobae | panT2 | panT2 | 0.277795  | Brush border |
| 1  | 1283 | 1833  | 270447   | 1276 | 270447   | 0.00021393 | 0.00021393 | 0.128122 | 0.277795 | mm | rd | du0r1 | colobae | panT2 | panT2 | 0.277795  | Brush border |
| 3  | 369  | 1836  | 217434   | 366  | 216088   | 0.00021394 | 0.00021394 | 0.128122 | 0.277795 | mm | rd | du0r1 | colobae | panT2 | panT2 | 0.277795  | Brush border |
| 1  | 1717 | 21718 | 270123   | 1710 | 270123   | 0.00021395 | 0.00021395 | 0.128122 | 0.277795 | mm | rd | du0r1 | colobae | panT2 | panT2 | 0.277795  | Brush border |
| 6  | 2030 | 1885  | 261347   | 2024 | 209652   | 0.00021397 | 0.00021397 | 0.128122 | 0.277795 | mm | rd | du0r1 | colobae | panT2 | panT2 | 0.277795  | Brush border |
| 12 | 1818 | 2071  | 460780   | 1846 | 460378   | 0.00021398 | 0.00021398 | 0.128122 | 0.277795 | mm | rd | du0r1 | colobae | panT2 | panT2 | 0.277795  | Brush border |
| 7  | 3279 | 3279  | 3279     | 3279 | 3279     | 0.00021399 | 0.00021399 | 0.128122 | 0.277795 | mm | rd | du0r1 | colobae | panT2 | panT2 | 0.277795  | Brush border |
| 7  | 1647 | 1835  | 241322   | 1640 | 239887   | 0.00064774 | 0.00064774 | 0.797329 | 0.61837  | mm | rd | du0r1 | colobae | panT2 | panT2 | 0.61837   | Brush border |
| 4  | 1335 | 1807  | 220084   | 1328 | 220084   | 0.00021400 | 0.00021400 | 0.128122 | 0.277795 | mm | rd | du0r1 | colobae | panT2 | panT2 | 0.277795  | Brush border |
| 7  | 1689 | 2463  | 444375   | 1682 | 440852   | 0.00021401 | 0.00021401 | 0.128122 | 0.277795 | mm | rd | du0r1 | colobae | panT2 | panT2 | 0.277795  | Brush border |
| 7  | 2076 | 2076  | 2076     | 2076 | 2076     | 0.00021402 | 0.00021402 | 0.128122 | 0.277795 | mm | rd | du0r1 | colobae | panT2 | panT2 | 0.277795  | Brush border |
| 4  | 157  | 157   | 157      | 157  | 157      | 0.00021403 | 0.00021403 | 0.128122 | 0.277795 | mm | rd | du0r1 | colobae | panT2 | panT2 | 0.277795  | Brush border |
| 3  | 152  | 2329  | 459242   | 149  | 427474   | 0.00021404 | 0.00021404 | 0.128122 | 0.277795 | mm | rd | du0r1 | colobae | panT2 | panT2 | 0.277795  | Brush border |
| 4  | 127  | 1040  | 465336   | 127  | 453226   | 0.00021405 | 0.00021405 | 0.128122 | 0.277795 | mm | rd | du0r1 | colobae | panT2 | panT2 | 0.277795  | Brush border |
| 0  | 48   | 2468  | 44833    | 48   | 444875   | 0.00021406 | 0.00021406 | 0.128122 | 0.277795 | mm | rd | du0r1 | colobae | panT2 | panT2 | 0.277795  | Brush border |
| 4  | 156  | 2362  | 385465   | 152  | 375041   | 0.00021407 | 0.00021407 | 0.128122 | 0.277795 | mm | rd | du0r1 | colobae | panT2 | panT2 | 0.277795  | Brush border |
| 1  | 119  | 2118  | 353463   | 118  | 353533   | 0.00021408 | 0.00021408 | 0.128122 | 0.277795 | mm | rd | du0r1 | colobae | panT2 | panT2 | 0.277795  | Brush border |
| 0  | 100  | 1224  | 241651   | 99   | 240537   | 0.00021409 | 0.00021409 | 0.128122 | 0.277795 | mm | rd | du0r1 | colobae | panT2 | panT2 | 0.277795  | Brush border |
| 1  | 2076 | 2076  | 2076     | 2076 | 2076     | 0.00021410 | 0.00021410 | 0.128122 | 0.277795 | mm | rd | du0r1 | colobae | panT2 | panT2 | 0.277795  | Brush border |
| 4  | 1238 | 2004  | 364465   | 1234 | 362374   | 0.00021411 | 0.00021411 | 0.128122 | 0.277795 | mm | rd | du0r1 | colobae | panT2 | panT2 | 0.277795  | Brush border |
| 1  | 843  | 1308  | 180648   | 840  | 180246   | 0.00021412 | 0.00021412 | 0.128122 | 0.277795 | mm | rd | du0r1 | colobae | panT2 | panT2 | 0.277795  | Brush border |
| 7  | 1287 | 1803  | 357155   | 1280 | 356852   | 0.00021413 | 0.00021413 | 0.128122 | 0.277795 | mm | rd | du0r1 | colobae | panT2 | panT2 | 0.277795  | Brush border |
| 1  | 1277 | 2127  | 217136   | 1270 | 215049   | 0.00021414 | 0.00021414 | 0.128122 | 0.277795 | mm | rd | du0r1 | colobae | panT2 | panT2 | 0.277795  | Brush border |
| 3  | 400  | 2004  | 317449   | 400  | 314441   | 0.00021415 | 0.00021415 | 0.128122 | 0.277795 | mm | rd | du0r1 | colobae | panT2 | panT2 | 0.277795  | Brush border |
| 7  | 2151 | 2223  | 347448   | 2144 | 346235   | 0.00021416 | 0.00021416 | 0.128122 | 0.277795 | mm | rd | du0r1 | colobae | panT2 | panT2 | 0.277795  | Brush border |
| 7  | 2386 | 1899  | 342749   | 2384 | 338849   | 0.00021417 | 0.00021417 | 0.128122 | 0.277795 | mm | rd | du0r1 | colobae | panT2 | panT2 | 0.277795  | Brush border |
| 10 | 207  | 2236  | 373014   | 206  | 370914   | 0.00021418 | 0.00021418 | 0.128122 | 0.277795 | mm | rd | du0r1 | colobae | panT2 | panT2 | 0.277795  | Brush border |
| 12 | 164  | 4633  | 364926   | 164  | 463329   | 0.00021419 | 0.00021419 | 0.128122 | 0.277795 | mm | rd | du0r1 | colobae | panT2 | panT2 | 0.277795  | Brush border |
| 1  | 187  | 3030  | 521748   | 186  | 520548   | 0.00021420 | 0.00021420 | 0.128122 | 0.277795 | mm | rd | du0r1 | colobae | panT2 | panT2 | 0.277795  | Brush border |
| 4  | 583  | 2043  | 403339   | 579  | 418274   | 0.00021421 | 0.00021421 | 0.128122 | 0.277795 | mm | rd | du0r1 | colobae | panT2 | panT2 | 0.277795  | Brush border |
| 1  | 4732 | 4732  | 4732     | 4732 | 4732     | 0.00021422 | 0.00021422 | 0.128122 | 0.277795 | mm | rd | du0r1 | colobae | panT2 | panT2 | 0.277795  | Brush border |
| 6  | 1859 | 2143  | 363395   | 1853 | 362525   | 0.00021423 | 0.00021423 | 0.128122 | 0.277795 | mm | rd | du0r1 | colobae | panT2 | panT2 | 0.277795  | Brush border |
| 4  | 54   | 204   | 483150   | 54   | 484115   | 0.00021424 | 0.00021424 | 0.128122 | 0.277795 | mm | rd | du0r1 | colobae | panT2 | panT2 | 0.277795  | Brush border |
| 5  | 1981 | 2578  | 439878   | 1976 | 437222   | 0.00021425 | 0.00021425 | 0.128122 | 0.277795 | mm | rd | du0r1 | colobae | panT2 | panT2 | 0.277795  | Brush border |
| 1  | 120  | 120   | 120      | 120  | 120      | 0.00021426 | 0.00021426 | 0.128122 | 0.277795 | mm | rd | du0r1 | colobae | panT2 | panT2 | 0.277795  | Brush border |
| 4  | 98   | 3036  | 567146   | 94   | 566990   | 0.00021427 | 0.00021427 | 0.128122 | 0.277795 | mm | rd | du0r1 | colobae | panT2 | panT2 | 0.277795  | Brush border |
| 12 | 2360 | 20718 | 248771   | 2348 | 248703   | 0.00021428 | 0.00021428 | 0.128122 | 0.277795 | mm | rd | du0r1 | colobae | panT2 | panT2 | 0.277795  | Brush border |
| 1  | 2014 | 17464 | 306827   | 2007 | 304893   | 0.00021429 | 0.00021429 | 0.128122 | 0.277795 | mm | rd | du0r1 | colobae | panT2 | panT2 | 0.277795  | Brush border |
| 2  | 1033 | 2913  | 460335   | 1031 | 460234   | 0.00021430 | 0.00021430 | 0.128122 | 0.277795 | mm | rd | du0r1 | colobae | panT2 | panT2 | 0.277795  | Brush border |
| 1  | 2044 | 1041  | 448123   | 2041 | 448123   | 0.00021431 | 0.00021431 | 0.128122 | 0.277795 | mm | rd | du0r1 | colobae | panT2 | panT2 | 0.277795  | Brush border |
| 8  | 1189 | 1466  | 274454   | 1181 | 274938   | 0.00021432 | 0.00021432 | 0.128122 | 0.277795 | mm | rd | du0r1 | colobae | panT2 | panT2 | 0.277795  | Brush border |
| 1  | 1197 | 1197  | 1197     | 1197 | 1197     | 0.00021433 | 0.00021433 | 0.128122 | 0.277795 | mm | rd | du0r1 | colobae | panT2 | panT2 | 0.277795  | Brush border |
| 7  | 1840 | 1800  | 278263   | 1833 | 277423   | 0.00021434 | 0.00021434 | 0.128122 | 0.277795 | mm | rd | du0r1 | colobae | panT2 | panT2 | 0.277795  | Brush border |
| 7  | 1627 | 1627  | 1627     | 1620 | 329440   | 0.00021435 | 0.00021435 | 0.128122 | 0.277795 | mm | rd | du0r1 | colobae | panT2 | panT2 | 0.277795  | Brush border |
| 1  | 1028 | 1028  | 1028     | 1020 | 370817   | 0.00021436 | 0.00021436 | 0.128122 | 0.277795 | mm | rd | du0r1 | colobae | panT2 | panT2 | 0.277795  | Brush border |
| 0  | 93   | 1158  | 271389   | 93   | 270481   | 0.00021437 | 0.00021437 | 0.128122 | 0.277795 | mm | rd | du0r1 | colobae | panT2 | panT2 | 0.277795  | Brush border |
| 1  | 156  | 156   | 156      | 156  | 156      | 0.00021438 | 0.00021438 | 0.128122 | 0.277795 | mm | rd | du0r1 | colobae | panT2 | panT2 | 0.277795  | Brush border |
| 4  | 1056 | 1884  | 181947   | 1052 | 180763   | 0.00021439 | 0.00021439 | 0.128122 | 0.277795 | mm | rd | du0r1 | colobae | panT2 | panT2 | 0.277795  | Brush border |
| 4  | 554  | 2106  | 420446   | 550  | 421440   | 0.00021440 | 0.00021440 | 0.128122 | 0.277795 | mm | rd | du0r1 | colobae | panT2 | panT2 | 0.277795  | Brush border |
| 1  | 308  | 308   | 308      | 302  | 321361   | 0.00021441 | 0.00021441 | 0.128122 | 0.277795 | mm | rd | du0r1 | colobae | panT2 | panT2 | 0.277795  | Brush border |
| 6  | 419  | 619   | 131328   | 405  | 130769   | 0.00021442 | 0.00021442 | 0.128122 | 0.277795 | mm | rd | du0r1 | colobae | panT2 | panT2 | 0.277795  | Brush border |
| 1  | 3025 | 1029  | 22007134 | 3024 | 22007134 | 0.00021443 | 0.00021443 | 0.128122 | 0.277795 | mm | rd | du0r1 | colobae | panT2 | panT2 | 0.277795  | Brush border |
| 1  | 433  | 798   | 176084   | 422  | 175288   | 0.00021444 | 0.00021444 | 0.128122 | 0.277795 | mm | rd | du0r1 | colobae | panT2 | panT2 | 0.277795  | Brush border |
| 1  | 483  | 1548  | 288470   | 480  | 288400   | 0.00021445 | 0.00021445 | 0.128122 | 0.277795 | mm | rd | du0r1 | colobae | panT2 | panT2 | 0.277795  | Brush border |
| 11 | 3255 | 10248 | 355224   | 3244 | 354817   | 0.00021446 | 0.00021446 | 0.128122 | 0.277795 | mm | rd | du0r1 | colobae | panT2 | panT2 | 0.277795  | Brush border |
| 5  | 627  | 1230  | 228109   | 622  | 228779   | 0.00021447 | 0.00021447 | 0.128122 | 0.277795 | mm | rd | du0r1 | colobae | panT2 | panT2 | 0.277795  | Brush border |
| 1  | 213  | 213   | 213      | 213  | 213      | 0.00021448 | 0.00021448 | 0.128122 | 0.277795 | mm | rd | du0r1 | colobae | panT2 | panT2 | 0.277795  | Brush border |
| 22 | 2186 | 16817 | 368221   | 2184 | 368221   | 0.00021449 | 0.00021449 | 0.128122 | 0.277795 | mm | rd | du0r1 | colobae | panT2 | panT2 | 0.277795  | Brush border |
| 1  | 1028 | 1028  | 1028     | 1028 | 1028     | 0.00021450 | 0.00021450 | 0.128122 | 0.277795 | mm | rd | du0r1 | colobae | panT2 | panT2 | 0.277795  | Brush border |
| 8  | 2033 | 925   | 198494   | 2032 | 199389   | 0.00021451 | 0.00021451 | 0.128122 | 0.277795 | mm | rd | du0r1 | colobae | panT2 | panT2 | 0.277795  | Brush border |
| 9  | 1882 | 1882  | 1882     | 1882 | 1882     | 0.00021452 | 0.00021452 | 0.128122 | 0.277795 | mm | rd | du0r1 | colobae | panT2 | panT2 | 0.277795  | Brush border |
| 8  | 807  | 1463  | 264375   | 806  | 264342   | 0.00021453 | 0.00021453 | 0.128122 | 0.277795 | mm | rd | du0r1 | colobae | panT2 | panT2 | 0.277795  | Brush border |
| 1  | 1048 | 1048  | 1048     | 1048 | 1048     | 0.00021454 | 0.00021454 | 0.128122 | 0.277795 | mm | rd | du0r1 | colobae | panT2 | panT2 | 0.277795  | Brush border |
| 0  | 216  | 1968  | 368028   | 216  | 368042   | 0.00021455 | 0.00021455 | 0.128122 | 0.277795 | mm | rd | du0r1 | colobae | panT2 | panT2 | 0.277795  | Brush border |
| 1  | 1411 | 1411  | 1411     | 1411 | 1411     | 0.00021456 |            |          |          |    |    |       |         |       |       |           |              |





|    |       |        |         |        |             |             |             |             |             |          |          |        |        |        |         |        |             |              |              |              |
|----|-------|--------|---------|--------|-------------|-------------|-------------|-------------|-------------|----------|----------|--------|--------|--------|---------|--------|-------------|--------------|--------------|--------------|
| 2  | 151   | 12375  | 279641  | 149    | 2776684     | 5.41327E-05 | 0           | 0           | 0.000516777 | 2.89554  | 154881   | rMmAd2 | pupMm1 | colobM | chomM   | dMmNoM | prcMm1      | 0.152300029  | Brush border |              |
| 5  | 152   | 12376  | 279642  | 150    | 2776685     | 5.41327E-05 | 0           | 0           | 0.000516777 | 2.89554  | 154882   | rMmAd2 | pupMm1 | colobM | chomM   | dMmNoM | prcMm1      | 0.152300029  | Brush border |              |
| 1  | 222   | 15369  | 3465267 | 221    | 3447578     | 4.45842E-05 | 0           | 0           | 6.44978E-05 | 1.004435 | 1        | rMmAd2 | pupMm1 | colobM | dMmNoM  | chomM  | hAdM1       | 1            | Brush border |              |
| 0  | 82    | 138070 | 2803870 | 82     | 279428      | 2.00202E-05 | 0           | 0           | 0           | 0        | 1        | rMmAd2 | pupMm1 | colobM | DaubMm1 | pupMm1 | dMmNoM      | dMmNoM       | Brush border |              |
| 1  | 84    | 138072 | 2803892 | 84     | 279428      | 1.99999E-05 | 0           | 0           | 0           | 0        | 1        | rMmAd2 | pupMm1 | colobM | dMmNoM  | chomM  | hAdM1       | 1            | Brush border |              |
| 0  | 426   | 30061  | 516621  | 426    | 508663      | 8.25381E-05 | 0           | 0           | 0           | 0.188917 | rMmAd2   | pupMm1 | colobM | dMmNoM | rMm1    | carMm1 | 0.189874643 | Brush border |              |              |
| 1  | 18068 | 60     | 124950  | 18068  | 60          | 124950      | 0           | 0           | 0           | 0        | 1        | rMmAd2 | pupMm1 | colobM | carMm1  | carMm1 | carMm1      | carMm1       | Brush border |              |
| 3  | 294   | 15940  | 317520  | 291    | 315563      | 9.26718E-05 | 0           | 0           | 0.00038206  | 2.03896  | rMmAd2   | pupMm1 | colobM | ehM1   | ehM1    | dMmNoM | 0.185144731 | Brush border |              |              |
| 6  | 30098 | 366    | 108540  | 30098  | 366         | 108540      | 0           | 0           | 6.64966E-05 | 0.181164 | rMmAd2   | pupMm1 | colobM | carMm1 | carMm1  | carMm1 | 0.176142773 | Brush border |              |              |
| 0  | 27    | 20410  | 382741  | 27     | 380331      | 7.04517E-04 | 0           | 0           | 0           | 0        | 1        | rMmAd2 | pupMm1 | colobM | leuMm2  | leuMm2 | leuMm2      | 1            | Brush border |              |
| 0  | 247   | 10398  | 288750  | 247    | 287225      | 8.55441E-05 | 0           | 0           | 0           | 0.048483 | rMmAd2   | pupMm1 | colobM | ehM1   | ehM1    | ehM1   | ehM1        | ehM1         | Brush border |              |
| 0  | 158   | 11885  | 273846  | 158    | 273846      | 5.99662E-05 | 0           | 0           | 0           | 0        | 1        | rMmAd2 | pupMm1 | colobM | ehM1    | ehM1   | ehM1        | ehM1         | Brush border |              |
| 5  | 334   | 30095  | 538335  | 329    | 538320      | 6.22181E-05 | 0           | 0           | 0.00066141  | 1.070739 | 0.042797 | rMmAd2 | pupMm1 | colobM | leuMm1  | leuMm1 | carMm1      | 0.140424384  | Brush border |              |
| 1  | 163   | 19903  | 457044  | 163    | 457044      | 4.18702E-05 | 0           | 0           | 8.93066E-05 | 0.119519 | rMmAd2   | pupMm1 | colobM | leuMm1 | leuMm1  | leuMm1 | leuMm1      | 0.143823614  | Brush border |              |
| 0  | 94    | 20440  | 584370  | 94     | 582228      | 2.48221E-05 | 0           | 0           | 0           | 0        | 1        | rMmAd2 | pupMm1 | colobM | gMm1    | gMm1   | gMm1        | gMm1         | 1            | Brush border |
| 0  | 94    | 20440  | 584370  | 94     | 582228      | 1.98680E-05 | 0           | 0           | 0           | 0        | 1        | rMmAd2 | pupMm1 | colobM | gMm1    | gMm1   | gMm1        | gMm1         | 1            | Brush border |
| 0  | 95    | 20441  | 584371  | 95     | 582229      | 4.30087E-05 | 0           | 0           | 0           | 0        | 1        | rMmAd2 | pupMm1 | colobM | gMm1    | gMm1   | gMm1        | gMm1         | 1            | Brush border |
| 0  | 155   | 20512  | 478278  | 155    | 474126      | 2.42228E-05 | 0           | 0           | 0           | 0        | 1        | rMmAd2 | pupMm1 | colobM | leuMm1  | leuMm1 | leuMm1      | leuMm1       | 1            | Brush border |
| 0  | 24989 | 36     | 438826  | 24989  | 36          | 438826      | 0           | 0           | 0           | 0        | 1        | rMmAd2 | pupMm1 | colobM | leuMm1  | leuMm1 | leuMm1      | leuMm1       | 1            | Brush border |
| 1  | 57    | 14028  | 280320  | 56     | 280308      | 1.97778E-05 | 0           | 0           | 6.69882E-05 | 0.378708 | 0.258933 | rMmAd2 | pupMm1 | colobM | leuMm1  | leuMm1 | ehM1        | 0.252323260  | Brush border |              |
| 1  | 2284  | 423265 | 220     | 423265 | 1.59825E-05 | 0           | 0           | 4.28376E-05 | 0.182854    | 1        | rMmAd2   | pupMm1 | colobM | leuMm1 | leuMm1  | leuMm1 | leuMm1      | 0.153190221  | Brush border |              |
| 1  | 185   | 423987 | 184     | 424648 | 1.96351E-05 | 0           | 0           | 4.30226E-05 | 0.197836    | 1        | rMmAd2   | pupMm1 | colobM | leuMm1 | leuMm1  | leuMm1 | leuMm1      | 0.153190221  | Brush border |              |
| 1  | 174   | 26477  | 483063  | 174    | 478436      | 3.61697E-05 | 0           | 0           | 3.77688E-05 | 1.044238 | 0.673176 | rMmAd2 | pupMm1 | colobM | leuMm1  | leuMm1 | leuMm1      | 0.167226266  | Brush border |              |
| 2  | 202   | 2929   | 49529   | 202    | 49286       | 6.39822E-05 | 0           | 0           | 6.82899E-05 | 0.198651 | 1        | rMmAd2 | pupMm1 | colobM | ehM1    | ehM1   | ehM1        | ehM1         | 1            | Brush border |
| 2  | 170   | 30313  | 532126  | 168    | 529993      | 3.24668E-05 | 0           | 0           | 6.63724E-05 | 0.20432  | 0.258411 | rMmAd2 | pupMm1 | colobM | mMm1    | rMm1   | ehM1        | 0.256243431  | Brush border |              |
| 2  | 222   | 29707  | 433045  | 222    | 431628      | 5.14620E-05 | 0           | 0           | 4.88286E-05 | 0.698937 | 1        | rMmAd2 | pupMm1 | colobM | mMm1    | mMm1   | mMm1        | 0.153190221  | Brush border |              |
| 0  | 232   | 13407  | 256329  | 232    | 255192      | 9.04871E-05 | 0           | 0           | 0           | 0.818377 | rMmAd2   | pupMm1 | colobM | mMm1   | mMm1    | mMm1   | mMm1        | 0.638513889  | Brush border |              |
| 0  | 37205 | 30     | 399860  | 37205  | 30          | 399860      | 2.11811E-05 | 0           | 0           | 0        | 1        | rMmAd2 | pupMm1 | colobM | leuMm1  | leuMm1 | leuMm1      | leuMm1       | 1            | Brush border |
| 0  | 339   | 20275  | 417225  | 339    | 414810      | 5.0         | 0           | 0           | 0.0729790   | rMmAd2   | pupMm1   | colobM | ehM1   | ehM1   | ehM1    | ehM1   | ehM1        | 0.274799951  | Brush border |              |
| 3  | 394   | 21729  | 400920  | 391    | 406827      | 9.63266E-05 | 0           | 0           | 0.000318071 | 1.431916 | 0.471888 | rMmAd2 | pupMm1 | colobM | ehM1    | ehM1   | ehM1        | 0.471745039  | Brush border |              |
| 1  | 107   | 10324  | 592676  | 107    | 590420      | 1.26448E-05 | 0           | 0           | 0           | 0        | 0.431920 | rMmAd2 | pupMm1 | colobM | ehM1    | ehM1   | ehM1        | 0.520760260  | Brush border |              |
| 1  | 141   | 18788  | 394662  | 140    | 379789      | 3.92440E-05 | 0           | 0           | 5.54866E-05 | 0.136839 | 0.521213 | rMmAd2 | pupMm1 | colobM | ehM1    | ehM1   | ehM1        | 0.520760260  | Brush border |              |
| 1  | 207   | 13254  | 592676  | 207    | 590420      | 1.26448E-05 | 0           | 0           | 0           | 0        | 0.431920 | rMmAd2 | pupMm1 | colobM | ehM1    | ehM1   | ehM1        | 0.520760260  | Brush border |              |
| 2  | 354   | 24937  | 434988  | 352    | 432661      | 8.18190E-05 | 0           | 0           | 8.41870E-05 | 1.03484  | 0.72005  | rMmAd2 | pupMm1 | colobM | prcMm1  | ehM1   | ehM1        | 0.720002051  | Brush border |              |
| 2  | 152   | 20359  | 540290  | 150    | 537485      | 7.81312E-05 | 0           | 0           | 7.00202E-05 | 0.248022 | 0.194443 | rMmAd2 | pupMm1 | colobM | PrMm1   | leuMm1 | leuMm1      | 0.191271238  | Brush border |              |
| 2  | 2029  | 18778  | 527718  | 2029   | 524767      | 6.84725E-05 | 0           | 0           | 6.84725E-05 | 0.120882 | 1        | rMmAd2 | pupMm1 | colobM | ehM1    | ehM1   | ehM1        | 0.451941614  | Brush border |              |
| 1  | 191   | 30021  | 534029  | 190    | 527428      | 3.84432E-05 | 0           | 0           | 3.31155E-05 | 0.908855 | 1        | rMmAd2 | pupMm1 | colobM | rMm1    | mMm1   | ehM1        | 1            | Brush border |              |
| 1  | 184   | 19481  | 438613  | 184    | 437023      | 8.48623E-05 | 0           | 0           | 0.000396419 | 1.04347  | 0.520073 | rMmAd2 | pupMm1 | colobM | ehM1    | ehM1   | ehM1        | 0.920455454  | Brush border |              |
| 1  | 437   | 22737  | 459889  | 437    | 457566      | 7.48806E-05 | 0           | 0           | 0           | 0        | 0        | 1      | rMmAd2 | pupMm1 | colobM  | ehM1   | ehM1        | ehM1         | 1            | Brush border |
| 1  | 409   | 22827  | 432071  | 409    | 430531      | 6.55241E-05 | 0           | 0           | 0           | 0        | 0        | 1      | rMmAd2 | pupMm1 | colobM  | ehM1   | ehM1        | ehM1         | 0.512042480  | Brush border |
| 2  | 385   | 24413  | 4505417 | 383    | 451004      | 7.17838E-05 | 0           | 0           | 1.93265E-05 | 1.11055  | 0.702009 | rMmAd2 | pupMm1 | colobM | ehM1    | ehM1   | ehM1        | 0.702468939  | Brush border |              |
| 1  | 167   | 32736  | 540290  | 166    | 547006      | 3.04446E-05 | 0           | 0           | 3.07523E-05 | 0.102407 | 0.628313 | rMmAd2 | pupMm1 | colobM | ehM1    | ehM1   | ehM1        | 0.628302610  | Brush border |              |
| 1  | 224   | 18286  | 445012  | 224    | 443188      | 5.30088E-05 | 0           | 0           | 4.09283E-05 | 0.182926 | 1        | rMmAd2 | pupMm1 | colobM | ehM1    | ehM1   | ehM1        | 0.471745039  | Brush border |              |
| 0  | 220   | 17546  | 347718  | 220    | 346925      | 6.22696E-05 | 0           | 0           | 0           | 0.633203 | 0.643718 | rMmAd2 | pupMm1 | colobM | ehM1    | ehM1   | ehM1        | 0.643404831  | Brush border |              |
| 1  | 181   | 13849  | 338499  | 181    | 337178      | 1.14855E-05 | 0           | 0           | 0           | 0        | 0        | 1      | rMmAd2 | pupMm1 | colobM  | ehM1   | ehM1        | ehM1         | 0.471745039  | Brush border |
| 6  | 1698  | 18116  | 347312  | 1692   | 346016      | 0.00040831  | 0           | 0           | 0.00027382  | 0.071203 | 0.402117 | rMmAd2 | pupMm1 | colobM | ehM1    | ehM1   | ehM1        | 0.402143603  | Brush border |              |
| 1  | 2076  | 22076  | 420714  | 2076   | 419024      | 0.00042432  | 0           | 0           | 0.00024242  | 0.127211 | 0.312163 | rMmAd2 | pupMm1 | colobM | ehM1    | ehM1   | ehM1        | 0.312163163  | Brush border |              |
| 10 | 1838  | 460628 | 460628  | 1838   | 459709      | 0.00041713  | 0           | 0           | 0.00037946  | 0.096134 | 0.880354 | rMmAd2 | pupMm1 | colobM | ehM1    | ehM1   | ehM1        | 0.88031822   | Brush border |              |
| 3  | 946   | 11037  | 222778  | 943    | 221611      | 0.00044753  | 0           | 0           | 0.00072306  | 0.041904 | 0.692924 | rMmAd2 | pupMm1 | colobM | ehM1    | ehM1   | ehM1        | 0.692404402  | Brush border |              |
| 3  | 1096  | 12064  | 23066   | 1096   | 23066       | 0.00041713  | 0           | 0           | 8.97847E-05 | 0.204219 | 0.520248 | rMmAd2 | pupMm1 | colobM | ehM1    | ehM1   | ehM1        | 0.520248000  | Brush border |              |
| 1  | 574   | 21318  | 379229  | 573    | 377601      | 0.00011308  | 0           | 0           | 4.22189E-05 | 0.28006  | 0.278312 | rMmAd2 | pupMm1 | colobM | ehM1    | ehM1   | ehM1        | 0.278305705  | Brush border |              |
| 1  | 104   | 104    | 104     | 104    | 104         | 0.00041713  | 0           | 0           | 0.00031673  | 0.00066  | 0.000265 | rMmAd2 | pupMm1 | colobM | ehM1    | ehM1   | ehM1        | 0.000265141  | Brush border |              |
| 3  | 1243  | 127086 | 1240    | 127084 | 0.00045483  | 0           | 0           | 0.000370734 | 1.55057     | 0.30382  | rMmAd2   | pupMm1 | colobM | ehM1   | ehM1    | ehM1   | 0.301290793 | Brush border |              |              |
| 2  | 388   | 11035  | 214287  | 388    | 213232      | 0.00027848  | 0           | 0           | 0.00018054  | 1.03181  | 0.72044  | rMmAd2 | pupMm1 | colobM | ehM1    | ehM1   | ehM1        | 0.720252007  | Brush border |              |
| 2  | 178   | 20538  | 378265  | 178    | 376805      | 0.00029612  | 0           | 0           | 0.00029612  | 1.38823  | 0.402713 | rMmAd2 | pupMm1 | colobM | ehM1    | ehM1   | ehM1        | 0.402713000  | Brush border |              |
| 7  | 1978  | 26158  | 460289  | 1971   | 460289      | 0.00017599  | 0           | 0           | 0.000205525 | 0.684262 | 0.354345 | rMmAd2 | pupMm1 | colobM | ehM1    | ehM1   | ehM1        | 0.3512447    | Brush border |              |
| 0  | 2054  | 460289 | 460289  | 2054   | 460289      | 0.00040831  | 0           | 0           | 0.00029612  | 1.38823  | 0.402713 | rMmAd2 | pupMm1 | colobM | ehM1    | ehM1   | ehM1        | 0.402713000  | Brush border |              |
| 0  | 163   | 26565  | 337151  | 163    | 336550      | 4.97388E-05 | 0           | 0           | 0           | 0        | 0.613209 | rMmAd2 | pupMm1 | colobM | ehM1    | ehM1   | ehM1        | 0.613147434  | Brush border |              |
| 0  | 1683  | 18085  | 245243  | 1683   | 245243      | 0.00041713  | 0           | 0           | 0.00039041  | 1.84817  | 0.74517  | rMmAd2 | pupMm1 | colobM | ehM1    | ehM1   | ehM1        | 0.745170000  | Brush border |              |
| 0  | 1972  | 20943  | 442473  | 1972   | 442473      | 0.00041713  | 0           | 0           | 0.00039041  | 1.84817  | 0.74517  | rMmAd2 | pupMm1 | colobM | ehM1    | ehM1   | ehM1        | 0.745170000  | Brush border |              |
| 3  | 628   | 2748   | 396479  | 625    | 393421      | 0.00019038  | 0           | 0           | 0.00029612  | 1.38823  | 0.402713 | rMmAd2 | pupMm1 | colobM | ehM1    | ehM1   | ehM1        | 0.402713000  | Brush border |              |
| 1  | 161   | 46043  | 46043   | 161    | 459525      | 4.14815E-05 | 0           | 0           | 7.88521E-05 | 0.427592 | 0.28362  | rMmAd2 | pupMm1 | colobM | ehM1    | ehM1   | ehM1        | 0.283620000  | Brush border |              |
| 0  | 161   | 28169  | 46043   | 161    | 46043       | 3.49756E-05 | 0           | 0           | 0           | 0        | 1        | rMmAd2 | pupMm1 | colobM | ehM1    | ehM1   | ehM1        | 1            | Brush border |              |
| 0  | 161   | 28169  | 46043   | 161    | 46043       | 3.49756E-05 | 0           | 0           | 0           | 0        | 1        | rMmAd2 | pupMm1 | colobM | ehM1    | ehM1   | ehM1        | 1            | Brush border |              |
| 4  | 53    | 2447   | 388280  | 540    | 388463      | 0.00013137  | 0           | 0           | 0.0007816   | 1        |          |        |        |        |         |        |             |              |              |              |



\*Proportion of genome-wide convergent sites to genome-wide possible sites" is based on the counts from column 2 and column 4  
\*Proportion of convergent sites convergent in the GO term to sites possible in the GO term" is based on the counts from column 1 and column 3  
\*Odds ratio" is the strength of the association between the GO term and number of convergent sites  
\*Pval" is the probability of association between the GO term and number of convergent sites  
\*Species1or\_group1[OUT1,OUT1]" and \*Species2or\_group2[OUT2,OUT2]" represent the comparison between Species 1 and Species 2 with respective outgroups  
\*Fisher pval" is the p-value from the Fisher's exact test  
\*GO pathway" is the data from the hydrolyase activity or brush border species comparisons



## SI References

1. R. S. Harris, "Improved pairwise alignment of genomic DNA," The Pennsylvania State University. (2007).
2. H. Jónsson, A. Ginolhac, M. Schubert, P. L. F. Johnson, L. Orlando, mapDamage2.0:fast approximate Bayesian estimates of ancient DNA damage parameters. *Bioinformatics* **29**, 1682–1684 (2013).
3. L. Salichos, A. Rokas, Inferring ancient divergences requires genes with strong phylogenetic signals. *Nature* **497**, 327–331 (2013).
4. E. Sayyari, S. Mirarab. Fast coalescent-based computation of local branch support from quartet frequencies. *Mol. Biol. Evol.* **33**, 1654–1668 (2016).
5. E. Sayyari, J. B. Whitfield, S. Mirarab, DiscoVista: Interpretable visualizations of gene tree discordance. *Mol. Phylogenet. Evol.* **122**, 110–115 (2018).
6. Z. Yang, PAML 4: Phylogenetic Analysis by Maximum Likelihood. *Mol. Biol. Evol.* **24**, 1586–1591 (2007).
7. UCSC Vertebrate Multiz Alignment & Conservation (46 Species) [WWW data]  
<http://hgdownload.soe.ucsc.edu/goldenPath/hg19/multiz46way/>.
8. X. Zhou, *et al.*, Whole-genome sequencing of the snub-nosed monkey provides insights into folivory and evolutionary history. *Nat. Genet.* **46**, 1303–1310 (2014).
9. J. Huerta-Cepas, F. Serra, P. Bork, ETE 3: reconstruction, analysis, and visualization of phylogenomic data. *Mol. Biol. Evol.* **33**, 1635–1638 (2016).
10. Y. Benjamini, Y. Hochberg, Controlling the false discovery rate: A practical and powerful approach to multiple testing. *J. R. Stat. Soc. Ser. B* **57**, 289–300 (1995).
11. Gene [Internet]. Bethesda (MD): National Library of Medicine (US), National Center for Biotechnology Information; 2004 – [cited 2021-01-20]. Available from: <https://www.ncbi.nlm.nih.gov/gene/>
